# Supplementary material for: Genetic architecture behind developmental and seasonal control of tree growth and wood properties in Norway spruce
Source: Front Plant Sci. 2022 Aug 9;13:927673. doi: 10.3389/fpls.2022.927673 (PMC9396349; doi:10.3389/fpls.2022.927673)
Supplement: Supplementary file 2 [file Table_1.XLSX]

## Sheet: Table S1 Heritability
Table S1 Pedigree-based and SNP-based narrow-sense heritabilities of different traits in different parts of wood.
Order	Trait (abbreiviation)	Pedigree-based heritability				SNP-based heritabilities
		Juvenile wood (JW)	Mature wood (MW)	Whole core wood (WCW)		Juvenile wood (JW)	Mature wood (JW)	Whole core wood (WCW)
1	Annual ring wood ring width (RW)	0.23 (0.05)	0.38 (0.05)	0.59 (0.06)		0.15 (0.08)	0.14 (0.07)	0.18 (0.08)
2	Earlywood ring width (ERW)	0.18 (0.05)	0.35 (0.05)	0.48 (0.06)		0.08 (0.07)	0.10 (0.07)	0.13 (0.07)
3	Transition wood ring width (TRW)	0.25 (0.05)	0.29 (0.05)	0.52 (0.06)		0.18 (0.08)	0.16 (0.07)	0.21 (0.08)
4	Latewood ring width (LRW)	0.13 (0.04)	0.26 (0.04)	0.49 (0.05)		0 (0)	0.21 (0.11)	0.20 (0.10)
5	Annual ring wood wood density (WD)	0.32 (0.05)	0.58 (0.06)	0.67 (0.06)		0.12 (0.09)	0.37 (0.10)	0.29 (0.10)
6	Earlywood density (EWD)	0.25 (0.04)	0.56 (0.06)	0.84 (0.06)		0.17 (0.11)	0.43 (0.11)	0.31 (0.10)
7	Transition wood density (TWD)	0.32 (0.05)	0.51 (0.06)	0.64 (0.06)		0.16 (0.10)	0.40 (0.10)	0.32 (0.09)
8	Latewood density (LWD)	0.30(0.05)	0.53 (0.05)	0.67 (0.06)		0.15 (0.08)	0.34 (0.09)	0.35 (0.09)
9	Annual ring wood radial tracheid width (RTW)	0.41 (0.05)	0.43 (0.05)	0.57 (0.06)		0.06 (0.09)	0.11 (0.11)	0.10 (0.10)
10	Earlywood radial tracheid width(ERTW)	0.31 (0.05)	0.42 (0.05)	0.61 (0.06)		0.06 (0.09)	0.09 (0.12)	0.06 (0.11)
11	Transition radial tracheid width(TWD)	0.38 (0.05)	0.40 (0.05)	0.57 (0.06)		0.04 (0.08)	0.11 (0.09)	0.18 (0.10)
12	Latewood radial tracheid width (LWD)	0.26 (0.04)	0.26 (0.05)	0.49 (0.05)		0.11 (0.11)	0.12 (0.10)	0.18 (0.11)
13	Annual ring wood tangential tracheid width (TTW)	0.11 (0.03)	0.32 (0.05)	0.37 (0.05)		0.35 (0.12)	0.03 (0.11)	0.10 (0.13)
14	Earlywood tangential tracheid width (ETTW)	0.03 (0.04)	0.28 (0.05)	0.38 (0.05)		0.33 (0.13)	0 (0)	0.12 (0.13)
15	Transition wood tangential tracheid width (TTTW)	0.12 (0.03)	0.28 (0.05)	0.34 (0.05)		0.15 (0.13)	0.11 (0.13)	0.01 (0.08)
16	Latewood tangential tracheid width (LTTW)	0.11 (0.03)	0.25 (0.05)	0.28 (0.05)		0.11 (0.11)	0.14 (0.11)	0.11 (0.10)
17	Annual ring wood wall thickness (WT)	0.26 (0.04)	0.51 (0.06)	0.54 (0.06)		0.11 (0.08)	0.34 (0.10)	0.28 (0.09)
18	Earlywood wall thickness (EWT)	0.18 (0.04)	0.49 (0.05)	0.60 (0.05)		0.10 (0.08)	0.38 (0.11)	0.28 (0.10)
19	Transition wood wall thickness (TWT)	0.26 (0.04)	0.39 (0.05)	0.47 (0.05)		0.13 (0.09)	0.34 (0.10)	0.30 (0.09)
20	Latewood wall thickness (LWT)	0.25 (0.04)	0.41 (0.05)	0.51 (0.05)		0.17 (0.10)	0.31 (0.09)	0.36 (0.10)
21	Annual ring wood coarseness ©	0.20 (0.04)	0.33 (0.05)	0.37 (0.05)		0.10 (0.09)	0.22 (0.09)	0.19 (0.09)
22	Earlywood coarseness (EC)	0.12 (0.04)	0.37 (0.05)	0.39 (0.05)		0.05 (0.07)	0.24 (0.10)	0.19 (0.09)
23	Transition wood coarseness (TC)	0.20 (0.04)	0.25 (0.05)	0.33 (0.05)		0.09 (0.09)	0.18 (0.08)	0.18 (0.09)
24	Latewood coarseness (LC)	0.17 (0.04)	0.22 (0.04)	0.29 (0.05)		0.17 (0.11)	0.24 (0.09)	0.26 (0.10)
25	Annual ring wood number of cells (NC)	0.27 (0.05)	0.38 (0.05)	0.50 (0.06)		0.18 (0.08)	0.15 (0.07)	0.22 (0.11)
26	Earlywood number of cells (ENC)	0.18 (0.05)	0.36 (0.05)	0.28 (0.05)		0.08 (0.07)	0.11 (0.07)	0.17 (0.07)
27	Transition wood number of cells (TNC)	0.28 (0.05)	0.27 (0.05)	0.36 (0.05)		0.20 (0.09)	0.16 (0.08)	0.13 (0.08)
28	Latewood number of cells (LNC)	0.14 (0.04)	0.26 (0.04)	0.14 (0.03)		0 (0)	0.23 (0.11)	0.21 (0.08)
29	Earlywood percentage (EP)	0.24 (0.04)	0.19 (0.04)	0.32 (0.05)		0.07 (0.09)	0.10 (0.09)	0.17 (0.11)
30	Transition wood percentage (TP)	0.15 (0.04)	0.09 (0.04)	0.29 (0.05)		0.13 (0.09)	0.13 (0.08)	0.19 (0.10)
31	Latewood percentage (LP)	0.06 (0.04)	0.17 (0.04)	0.2 0(0.05)		0.07 (0.07)	0.04 (0.06)	0.10 (0.09)
32	Earlywood/latewood percentage (EP/LP)	0.02 (0.02)	0.25 (0.04)	0.26 (0.05)		0.10 (0.08)	0.07 (0.08)	0.06 (0.08)
33	Annual ring wood microfibrial angle (MFA)	0.27 (0.04)	0.13 (0.04)	0.16 (0.04)		0.26 (0.10)	0.10 (0.08)	0.12 (0.08)
34	Annual ring wood modulus of elasticity (MOE)	0.31 (0.04)	0.38 (0.05)	0.43 (0.05)		0.27 (0.10)	0.21 (0.09)	0.19 (0.08)
Note that pedigree-based heritiablity is based on 505 half-sib families, SNP-based heritability based on 1303 unrelated individuals
The value in parenthesis is standard error

## Sheet: Table S2 GWAS SNPs LD
Table S2 Linkage disequilibrium (LD, r2) between candidate SNPs from genome-wide association study (GWAS).
Order of SNPs	Order of independent SNPs	SNP postion	MA_100689_23097	MA_10117117_4107	MA_10277463_4132	MA_10425958_1555	MA_10426292_14560	MA_10427326_2713	MA_10428113_5084	MA_10428274_929	MA_10428431_1990	MA_10428864_2972	MA_10431885_2231	MA_10432069_9424	MA_10432667_767	MA_10433057_20501	MA_10434168_1291	MA_10436600_2140	MA_106297_6413	MA_106297_6469	MA_108175_933	MA_108928_3179	MA_11005_24095	MA_113808_27662	MA_113962_5891	MA_114314_7847	MA_118436_1478	MA_125978_3122	MA_12842_2389	MA_12842_2476	MA_12842_2490	MA_128658_8024	MA_139242_9326	MA_14038_26748	MA_140464_12338	MA_141147_11247	MA_15237_12985	MA_15508_8004	MA_17597_20684	MA_183130_3773	MA_183273_8768	MA_184308_3458	MA_200163_3461	MA_20483_16380	MA_228591_5756	MA_228591_5904	MA_228591_6113	MA_228591_6152	MA_25654_27839
1	1	MA_100689_23097
2	2	MA_10117117_4107	0.000105641
3	3	MA_10277463_4132	0.000802179	2.52823e-05
4	4	MA_10425958_1555	0.00663422	0.00785207	0.00324596
5	5	MA_10426292_14560	0.00558695	0.00315459	0.000445584	0.0039766
6	6	MA_10427326_2713	0.00153748	0.0017581	0.00740631	0.0100125	0.00483915
7	7	MA_10428113_5084	0.000652069	0.000489277	1.49673e-05	0.00132161	0.000390325	1.32912e-06
8	8	MA_10428274_929	7.85304e-07	0.000143555	7.66615e-05	6.09932e-07	8.80848e-05	9.95199e-05	0.00229133
9	9	MA_10428431_1990	0.00106083	0.000165899	0.00378014	0.000366694	0.000367902	2.1382e-05	4.21865e-05	1.64062e-05
10	10	MA_10428864_2972	3.08025e-05	0.000105326	0.00304653	2.45169e-05	3.37756e-05	0.000525557	0.000116912	0.000184195	0.77529
11	11	MA_10431885_2231	0.00273382	0.000151678	0.0011844	0.00112233	4.8754e-05	0.000385206	0.00452715	0.000364476	0.00130107	0.0011364
12	12	MA_10432069_9424	0.00468991	3.80208e-05	0.000261557	0.00277683	0.00151676	0.000524712	0.00057557	0.00410198	0.00115549	0.000324736	0.00091681
13	13	MA_10432667_767	0.00783979	6.15756e-05	0.00775709	0.00445728	0.00517619	0.00474836	5.02503e-06	0.00470132	0.000795183	0.00139529	0.000141105	0.00339382
14	14	MA_10433057_20501	0.000637554	0.00180086	0.000744079	0.0041572	1.47988e-05	0.0157148	0.000911844	0.00616751	6.8345e-06	1.95575e-05	3.74743e-05	3.97264e-06	0.00529068
15	15	MA_10434168_1291	0.000378084	4.2982e-05	2.45665e-06	0.00372783	8.22126e-06	0.00254909	0.000140559	1.36468e-05	0.00545893	0.00373918	0.00106141	0.000877661	0.00437838	0.000959387
16	16	MA_10436600_2140	0.00105697	0.000126317	0.00214289	0.000607235	0.00243389	0.00127348	0.000198016	1.97356e-07	5.3226e-06	8.58285e-05	0.000434009	0.00205508	0.00586156	0.000932982	0.0124332
17	17	MA_106297_6413	0.0096157	0.0142248	5.06449e-05	0.00248955	0.00131806	7.9146e-05	0.00133888	0.000201445	0.00185621	0.00340335	0.00122766	0.00367189	0.000844793	0.00153794	6.87888e-10	0.00847194
18	17	MA_106297_6469	0.0084917	0.012902	9.21605e-05	0.00295065	0.00115854	7.77946e-06	0.00109606	0.000250421	0.00158415	0.00303527	0.00084797	0.00274546	0.00101213	0.00136776	8.78563e-07	0.00816846	0.979991
19	18	MA_108175_933	0.00103751	0.000388269	0.0010046	0.000298181	0.00036778	0.000351751	0.0018285	0.00112338	0.00262975	0.00150174	2.09222e-05	0.000298475	4.62642e-05	0.000145927	0.000939347	1.43559e-06	0.000760594	0.000806995
20	19	MA_108928_3179	0.000230301	0.000374351	0.000481258	0.00280273	0.00104127	0.000382973	0.0022344	6.41196e-07	0.00622604	0.006429	0.00126718	4.49037e-05	0.000670083	0.000811637	0.000603059	0.000901707	0.000127422	5.83337e-05	0.000457922
21	20	MA_11005_24095	0.00246674	0.000165889	0.000681555	0.000173572	0.000183557	0.0113033	0.000572752	7.25724e-05	0.00157038	0.00196492	0.000690953	9.98726e-05	0.00011912	0.00179424	0.00393524	2.49875e-05	0.000344636	0.000272818	2.0432e-05	0.00113223
22	21	MA_113808_27662	0.00146458	0.000176584	0.000474566	0.00255331	0.000214069	8.71281e-05	0.000793238	0.000130763	4.05272e-05	0.000238595	0.00132097	0.000193347	0.00063736	0.00153505	0.00204589	0.00120358	0.00318917	0.00242399	9.98936e-07	0.00117822	0.00121344
23	22	MA_113962_5891	0.000172207	6.29311e-05	0.000370496	0.00025954	0.000676865	0.00170294	0.000247192	0.000572603	0.000267396	0.000455782	0.000562736	5.00425e-07	0.000167362	0.000100841	2.97576e-05	0.000238541	5.886e-05	0.000134733	1.50233e-05	0.00038408	0.000712137	0.00217692
24	23	MA_114314_7847	3.23562e-06	0.000709297	0.000979332	0.001225	9.37376e-05	6.35255e-05	0.000187082	8.13128e-06	0.000458307	0.00125802	0.000146586	0.00208058	0.000270626	0.00339888	4.41153e-06	0.000139989	0.000634516	0.000808804	0.000691986	0.000599072	0.000519546	0.000293087	0.00286271
25	24	MA_118436_1478	0.000179905	5.39921e-05	0.000112623	0.00265212	0.00386065	0.00591898	0.0036021	0.000877309	0.000477304	1.20328e-05	0.00451774	0.00307598	0.00518414	0.000210824	0.000938753	0.00197213	0.00111368	0.00128258	6.35884e-06	5.58595e-05	0.00260291	0.00401843	0.00134148	0.000763926
26	25	MA_125978_3122	3.31435e-05	0.00041221	0.00104941	0.00295296	0.00239619	0.000824784	0.000510429	3.53465e-07	1.66941e-05	0.000122927	0.000569545	0.000401823	0.000627045	0.000477537	0.000299993	0.00198815	0.00172922	0.00152144	0.00012654	0.000994246	0.000312238	1.7517e-05	0.000346816	0.000136806	5.16216e-07
27	26	MA_12842_2389	0.0054016	0.183635	5.46661e-06	0.00128522	0.000543416	0.00113719	0.000135994	0.000466387	0.000576211	0.00150777	0.00346711	0.00307464	0.00167357	0.00056955	5.14354e-07	0.000669684	0.14371	0.138891	0.000832523	0.00417421	0.00193623	0.00195224	0.00109313	0.000116719	0.00458397	0.000194712
28	26	MA_12842_2476	0.00153174	0.259021	3.57629e-05	2.40022e-05	1.03093e-06	0.000776226	0.000259145	1.03887e-05	0.000765854	0.00115311	0.00389597	0.00141718	0.000114783	0.000158563	0.000714295	0.000158552	0.0706241	0.0657294	0.000549225	0.00138248	0.00124011	0.000254395	0.000298668	3.8588e-05	0.00118992	7.11756e-05	0.704121
29	26	MA_12842_2490	0.00504175	0.181683	6.21309e-05	0.00160903	0.000516057	0.00102215	0.00019573	0.000250372	0.000523439	0.00141444	0.00354034	0.00295439	0.00174103	0.000465361	9.87767e-06	0.00063917	0.144792	0.140004	0.000792277	0.00419124	0.00121986	0.00198026	0.00104442	0.000105932	0.00480297	0.000181748	0.988295	0.711481
30	27	MA_128658_8024	0.00166874	0.00328602	0.00353375	0.00618311	0.00281163	0.00358687	0.000676221	0.00125091	4.77195e-05	1.67312e-05	0.000464373	0.00425339	0.00280864	0.00551777	0.0047672	0.00153872	1.19095e-05	4.70994e-05	0.00174852	0.00030017	0.000659132	5.31277e-06	0.00235743	0.0001469	0.0349541	0.00070582	9.34053e-05	1.56044e-05	0.000146637
31	28	MA_139242_9326	0.00171988	0.000443363	6.49256e-06	0.00581378	0.00501634	0.0112493	0.00378451	0.0033901	0.000375795	0.000216344	0.00155102	0.00561206	0.00436303	0.000852406	0.000750439	0.000153361	0.000353045	0.00029178	0.00239297	0.000235383	0.000112757	5.57509e-05	6.12485e-07	0.000150373	0.00184231	0.00154819	0.000288137	0.000160633	0.000311029	0.000928227
32	29	MA_14038_26748	0.00160007	0.00105334	0.0035356	0.0036085	0.0012128	0.0087424	0.00475691	3.33881e-06	0.00106433	0.000614178	0.001183	0.000551332	0.00494738	0.00494148	0.00110323	0.000664547	0.0024024	0.00258156	0.000777246	0.000214302	0.00100998	9.93585e-07	0.00146567	9.81904e-05	0.00923642	7.61708e-06	9.77895e-05	0.00120462	0.000109063	0.00206158	0.000560267
33	30	MA_140464_12338	2.7184e-06	0.000127563	0.00170338	0.00114326	0.000810562	0.00124377	0.000117354	0.00342429	1.42216e-05	1.79127e-05	0.000288784	0.00568078	0.00838147	0.000751443	0.00327531	0.00167585	0.000382023	0.000408534	0.00237084	0.00101996	0.000524353	0.0078973	0.00289575	0.00179147	0.00366784	0.000301451	1.07072e-06	0.000102176	3.35883e-06	0.0118369	0.00649116	0.000535883
34	31	MA_141147_11247	0.00169172	0.00022686	6.67147e-05	0.00158794	0.000972796	0.000668186	3.08886e-05	0.00047299	0.002357	0.000984394	1.44583e-06	0.00109284	0.000214329	0.00237218	0.000138129	6.30008e-06	0.000476204	0.00050623	6.17108e-05	3.26498e-05	0.00199618	0.00435595	0.000205882	0.00126491	0.000969344	7.85899e-06	0.00579789	0.00348024	0.00569083	0.00497426	0.000860537	0.00124458	0.00359628
35	32	MA_15237_12985	0.000747237	4.61631e-05	0.000163298	6.16711e-05	8.70573e-05	0.00229625	0.000101571	4.65604e-06	0.00105388	5.65521e-05	3.55579e-05	0.00292056	0.00047368	0.000105477	0.00020714	2.6065e-05	0.000776528	0.000746022	1.80243e-05	0.000104005	0.00119148	0.000731722	0.000996889	0.00047473	0.000548862	0.000327021	0.00346711	0.00512304	0.00354034	8.36483e-05	1.69211e-06	0.0010016	3.84535e-08	0.000460036
36	33	MA_15508_8004	0.000101413	0.000204732	0.000581929	0.000166561	0.000551073	0.00121802	0.00330659	0.0017396	0.00357008	0.00574079	9.839e-05	0.00108973	0.000141283	2.43365e-06	0.000547326	1.94561e-06	0.00429257	0.00404259	3.45545e-05	0.000157371	1.95133e-05	0.0016115	8.20467e-05	0.0010732	6.05862e-05	0.000534292	0.00255785	0.00284523	0.00247652	0.000142936	0.00311875	2.02933e-05	0.000245231	0.000133018	0.000428243
37	34	MA_17597_20684	0.00772323	0.00455541	0.00564386	0.0262858	0.00628449	0.0136026	0.0025546	0.00371484	0.00151505	0.00146696	1.04529e-06	0.00655737	0.00443731	0.004895	0.007662	0.00252508	0.00719923	0.00800452	0.00378804	0.000635504	0.0021121	0.0040705	2.8981e-05	0.00206258	0.00137861	0.00126311	0.000332327	0.00189969	0.000404413	0.000943378	0.00374017	0.00831862	0.001067	0.00124561	4.79565e-05	5.68812e-07
38	35	MA_183130_3773	0.00676747	0.00202341	0.0039274	0.014834	0.00859316	0.00825362	0.00412102	0.00106917	1.74531e-05	2.05018e-05	0.000889792	0.003945	0.00365788	0.00206409	0.000784886	0.00135028	0.000197906	0.000258238	0.00226166	5.08628e-05	0.00260647	0.000337921	0.0051255	3.99612e-06	0.00169727	3.42894e-05	0.00269301	0.00118839	0.00354677	0.00190814	0.00472335	0.00833025	0.00826441	1.17237e-05	5.46422e-05	0.00170274	0.00923612
39	36	MA_183273_8768	0.000251215	0.000870557	0.00265233	0.000124831	0.00126121	0.000176708	0.00691677	0.00229483	0.000842093	0.000901966	5.45679e-06	0.000874248	0.0013325	0.00160813	3.45347e-05	0.00118452	2.23365e-06	2.94155e-05	2.51678e-06	0.000614953	0.000116078	0.00064319	0.0010872	0.000504465	0.00232377	6.49574e-06	0.000363152	0.00129901	0.000356026	0.00216548	0.00121718	0.00150545	6.48712e-05	1.57363e-05	0.00211426	0.000367064	0.00150724	0.00211808
40	37	MA_184308_3458	0.00358014	0.000350984	3.27953e-05	1.6494e-05	0.000742183	0.000120506	0.00181165	5.82199e-06	0.000338628	0.000468513	2.13657e-05	0.00569524	0.00033645	0.003309	6.583e-07	8.91381e-07	0.000250821	0.00014371	9.55747e-06	1.07453e-06	0.0020939	0.000603761	5.00468e-05	0.000589965	8.27891e-05	0.000292912	5.65026e-06	0.00013941	5.19669e-05	0.00169907	3.30554e-05	6.00923e-07	3.8887e-06	0.000500469	0.000360063	0.000106824	7.79039e-06	0.00115092	8.58932e-05
41	38	MA_200163_3461	0.000251052	0.000179214	0.000232326	0.00139726	1.49833e-06	9.98179e-08	0.00102977	0.000497725	4.47951e-05	3.02973e-05	5.15073e-06	0.000362266	0.000558909	3.29221e-06	0.00185192	0.000193167	0.00170478	0.0020648	0.000485265	0.0012761	0.00114069	0.000341382	0.000465307	0.000545717	9.34546e-08	0.000778945	0.000115244	0.000906491	0.000129806	0.00130804	0.000141087	0.000344674	4.62825e-07	3.30268e-06	0.00131474	1.98541e-07	0.00181484	1.17125e-05	0.00313495	0.000309541
42	39	MA_20483_16380	0.0123838	0.0025841	0.00236255	0.00610036	0.00837143	0.00295698	0.00230082	0.000883248	1.47006e-05	2.58118e-07	0.000157685	0.00110982	0.000774697	1.11591e-05	0.00149749	0.000513643	0.000493626	0.000673762	1.5248e-05	0.000513982	6.37117e-05	0.000465479	0.000611895	0.000530274	0.00187327	0.000828429	0.000785869	3.68022e-06	0.000996346	6.24882e-05	0.000137843	0.00122897	0.000129387	9.84914e-08	2.15462e-07	0.000314421	0.0098019	0.00467785	0.0139984	0.000954501	0.000450626
43	40	MA_228591_5756	0.00232196	0.000109085	6.0669e-05	0.00969826	0.00214833	0.00502116	0.00256554	0.00131281	0.000128167	0.00216428	0.000128652	0.00164812	0.00422428	0.00445684	0.000244852	0.0106964	0.0019144	0.00208622	0.00114037	6.95314e-05	0.00370887	0.00358473	0.00129247	0.00106946	0.00317907	0.00400073	0.00464797	0.00123033	0.00389168	0.00529602	0.00427842	0.000885191	0.00406052	0.00320725	0.000658134	0.000577115	0.0045478	0.00379187	0.00276686	0.000126625	0.000119711	0.00167563
44	40	MA_228591_5904	0.00262668	1.06182e-06	6.17572e-05	0.00975561	0.00208058	0.00685286	0.002143	0.00184131	0.000178071	0.00161285	0.000116984	0.00128676	0.00549234	0.0049961	0.000214764	0.0105269	0.00210376	0.00229522	0.00120724	7.62677e-05	0.00464524	0.0046898	0.000963813	0.00102673	0.0016999	0.00391425	0.00448599	0.00178265	0.003746	0.00565347	0.00353602	0.000726082	0.0043933	0.00302256	0.000631398	0.000613183	0.00430949	0.00430889	0.00323765	0.000140326	0.00022402	0.00161586	0.970415
45	40	MA_228591_6113	0.00208295	5.5545e-05	0.00014687	0.0105055	0.00243942	0.00737779	0.00350907	0.00169631	7.85323e-05	0.00169992	0.00034435	0.00180859	0.00592099	0.0036869	0.000317488	0.00852795	0.00163784	0.00178627	0.000744168	0.000179754	0.00603399	0.00349162	0.00096103	0.000931484	0.00424574	0.00333508	0.00414266	0.00244525	0.00345883	0.00485888	0.00299447	0.00107805	0.00425842	0.00126038	0.0015446	0.00135948	0.00442841	0.00511717	0.00228317	0.00022823	0.000389552	0.00177269	0.867046	0.894669
46	40	MA_228591_6152	0.00205223	1.39562e-08	2.02059e-05	0.00981301	0.00201431	0.00689304	0.00244895	0.00191885	8.5472e-05	0.00114237	0.000474448	0.00087737	0.00507023	0.00481878	0.000186758	0.00870707	0.00232189	0.00250215	0.00182522	0.000200565	0.00478753	0.00476506	0.000899614	0.000985119	0.00226685	0.00382916	0.00369222	0.00134952	0.0030336	0.00488138	0.00288982	0.000751118	0.00464678	0.00291663	0.00113946	0.000650328	0.00395258	0.00377734	0.0031045	5.36951e-05	0.000363976	0.00155749	0.929578	0.958745	0.900165
47	41	MA_25654_27839	0.00346385	0.00168866	0.000397301	0.00898722	0.00799953	0.00233541	0.00340905	0.00588067	0.000122376	6.66676e-06	7.46826e-07	0.00314989	0.0120355	0.01033	0.00242736	0.00719253	0.00845113	0.00858512	7.55445e-06	0.00234717	0.00941871	0.000932222	0.00114303	0.00219011	0.0175104	0.00028914	0.00717292	0.00102425	0.00626591	0.0141753	0.0061789	0.00501385	0.00569625	1.68266e-05	3.11039e-05	8.21621e-05	0.0222188	0.00618267	0.000824783	0.00189104	0.0031926	0.00885984	0.0107286	0.0108186	0.0098847	0.00871693
48	42	MA_27406_11793	0.00132652	0.000264348	0.00151357	1.62912e-05	0.00220321	0.000817487	6.37366e-05	8.2335e-05	9.30574e-06	0.000146191	0.000132627	0.000565194	3.72892e-10	4.10068e-05	0.00664442	0.000144715	0.00111214	0.000599279	5.10964e-05	0.000368927	1.26588e-06	0.00211701	0.000767809	0.000155858	8.38461e-05	0.000108607	0.000443068	0.000396302	0.000382539	0.00126929	5.67362e-05	3.84273e-06	0.00148362	0.000668417	0.00107778	0.000423963	0.000208609	0.0001731	6.1436e-06	0.000683161	3.79914e-07	0.00776581	0.0016188	0.00151105	0.00114384	0.00108783	0.000351609
49	42	MA_27406_11794	0.000934047	0.000141285	0.00186321	5.86397e-05	0.00220321	0.00105489	0.000268288	8.2335e-05	9.30574e-06	7.98342e-05	3.84679e-05	0.000565194	9.90273e-06	4.10068e-05	0.00664442	0.000287893	0.000629579	0.000266372	5.10964e-05	0.000368927	1.26588e-06	0.00211701	0.000767809	0.000155858	8.158e-05	0.000255691	0.000130733	0.000133699	0.000104018	0.00167129	9.62263e-05	4.06357e-05	0.00163272	0.00044036	0.000737962	0.000274576	0.000290954	0.000340164	6.1436e-06	0.000472631	3.79914e-07	0.00776581	0.0016188	0.00151105	0.00114384	0.00108783	0.000359684
50	42	MA_27406_11827	0.000835749	0.000111381	0.00113752	1.54294e-06	0.00236675	0.00102073	0.000169249	0.000247579	2.0944e-06	0.000155804	0.000400262	0.000598377	3.6908e-06	0.000107614	0.00606698	0.000192129	0.00128914	0.000729918	1.02217e-06	3.83878e-05	4.93199e-06	0.0019238	0.000527806	3.46987e-05	1.40451e-06	0.00014691	0.000389728	0.000100707	0.000337916	0.0016581	0.000424238	0.0001895	0.0011443	0.000196106	0.000835629	0.000685195	0.000465911	0.000266076	3.53903e-05	0.000579498	6.888e-05	0.00334348	0.00185557	0.00174422	0.00166833	0.00163699	0.000278473
51	43	MA_289646_3528	0.00101887	0.000958361	0.000808659	0.00351793	0.00336535	0.00824321	1.02688e-05	0.000771168	4.63357e-05	0.000150197	0.00287507	0.0051785	0.00657436	0.00638382	0.00252622	0.00355701	0.00358996	0.00448605	0.000871979	0.000267675	0.00573496	9.52148e-05	0.00138808	0.000521574	0.0169461	0.00080544	0.000223516	0.000332564	0.000199081	0.000215583	0.0137893	0.000225454	0.00344509	6.53352e-05	0.00120145	4.38883e-05	0.00564214	0.017196	0.00375845	0.000572254	0.00339623	0.00451153	0.00488583	0.00473146	0.00554116	0.00527781	0.00980674
52	44	MA_29357_4423	0.00227767	0.0548897	0.000492844	0.00436398	0.000309904	0.000173659	2.98219e-05	8.92622e-07	7.5527e-06	1.24195e-05	0.000506725	0.00748172	0.000963409	0.00321872	0.000874821	0.001638	0.076994	0.0729044	0.000346897	0.0015517	0.00612466	0.00130614	0.000340894	0.000559638	0.000777152	0.00511245	0.331865	0.209343	0.329955	0.00282333	0.00024085	9.45204e-05	8.84665e-05	0.00355893	0.000157184	9.09009e-05	0.00010914	0.00217852	0.0002961	0.000937714	2.29825e-06	0.0010058	0.000590584	0.000511666	0.000324449	0.000255982	0.00615427
53	45	MA_330891_664	0.000523349	0.000172733	4.17211e-05	0.00325304	0.000141593	0.000265075	0.000153983	0.00134125	3.63743e-05	0.000157332	4.80013e-05	0.00117308	0.000786252	0.0031063	4.83339e-07	0.000185804	0.000141875	0.000240958	0.000294216	0.00151997	0.000326352	0.000452507	1.36385e-05	9.38904e-05	8.80315e-05	7.57384e-06	0.000205771	0.000599664	0.000121226	9.23339e-05	0.00594405	0.000510737	0.000353994	0.00335336	0.00196081	0.0029458	0.00410753	0.000113884	8.08025e-06	0.00197203	9.88186e-06	2.02119e-06	4.36354e-05	5.74789e-05	0.000393776	7.30977e-05	6.6037e-06
54	46	MA_34433_11887	3.20954e-05	0.00166616	0.000283277	0.00146066	0.00116857	8.27988e-05	0.000784608	0.000211226	9.78974e-05	0.000477681	0.00252573	0.00333485	0.00377292	4.14873e-06	0.00144144	0.000460325	3.69559e-08	8.61483e-07	0.000316904	4.6539e-05	0.00254124	0.00245089	0.000252357	0.000638045	0.000944689	0.00195988	6.29441e-05	0.000237687	1.85882e-05	7.43358e-05	0.000723838	0.00183898	0.000150593	0.000314629	0.00291783	0.000452972	0.00132198	0.000387373	0.00375996	0.00123899	0.00025122	0.000293274	0.00118308	0.0015093	0.00119106	0.00145846	2.52231e-05
55	47	MA_360415_6124	5.81654e-07	0.000282949	5.17625e-06	0.00961102	0.000262516	0.00619348	0.00240303	3.53922e-06	2.3747e-05	0.000162886	4.71324e-05	0.00187842	0.000794647	0.00191801	0.00160114	0.000659014	0.00171676	0.001663	3.22882e-07	0.000299894	0.000454008	0.000346396	2.16808e-05	4.04388e-05	0.00102843	0.00105829	0.000275566	0.000115565	0.00053568	0.00427533	0.00861449	0.00194628	3.63084e-05	2.03149e-06	0.000406754	0.000169551	0.000354046	0.00102252	0.00036327	0.000421164	0.000534287	0.000201169	0.00134731	0.00139118	0.00200744	0.00221373	0.00311862
56	48	MA_42658_7332	0.00647732	4.29924e-06	0.00173647	0.00390254	0.0375386	0.00272137	0.00339397	0.00116707	0.000364159	0.000992074	3.55579e-05	0.00203317	0.00474317	0.00119798	0.000104253	0.00196026	0.00723387	0.00732469	0.00113445	0.000970396	0.000985419	0.00416277	0.0057566	0.00047473	0.00502013	0.00216001	0.00600114	0.002326	0.00592447	0.00665402	0.00916686	0.0020938	0.00250028	0.00113	3.55579e-05	0.000686388	0.00629646	0.00887253	0.00635477	1.99549e-05	3.36478e-06	0.00802295	0.00327567	0.00320014	0.0058278	0.00312588	0.00372763
57	49	MA_426944_681	0.00102085	0.00276708	0.00298942	0.00488281	0.00394994	0.00445645	0.00052051	0.000847872	0.000766028	0.00267727	0.00036338	1.8117e-06	0.00161638	0.000224354	0.0018843	0.000212068	8.34127e-05	1.86234e-05	0.000646629	1.1371e-05	0.00144572	0.000392767	0.000260376	0.000183356	0.0042391	0.000999518	5.98067e-05	3.64205e-05	4.98636e-05	0.00218185	0.000226368	0.000381243	0.00117136	0.000527674	0.00036338	0.000825272	0.00218211	0.00147306	0.000140009	0.000145005	0.000669414	0.00115931	0.00195637	0.00200283	0.00254848	0.00205076	0.00022152
58	50	MA_436199_1316	0.000230512	0.00172914	1.64521e-05	2.3393e-05	0.00444843	0.000627009	0.000174806	0.000884742	1.17294e-07	0.000641536	7.59771e-05	4.31391e-05	0.000400793	0.000206839	0.00152587	0.00121765	3.49203e-05	2.71826e-06	0.0022593	1.15865e-06	3.19491e-05	0.00105407	0.000104277	0.000624528	0.00551254	0.000455745	0.000163516	5.9009e-05	0.000312073	0.000674226	0.00087127	2.25744e-07	9.37374e-08	0.000406769	7.59771e-05	1.53918e-05	0.00107389	0.000900576	0.000553784	0.0017422	0.000626159	0.00116855	0.00180679	0.00142386	0.0026954	0.0013821	0.00199788
59	51	MA_464588_5453	0.00237149	0.00149162	0.00230262	0.0051781	0.00636708	0.000952597	0.000125849	0.00046317	7.29797e-05	0.000304415	9.23218e-05	0.00778163	0.00400005	0.00143846	0.00524823	0.00444759	0.00650586	0.00633721	0.00247599	0.0015997	0.00361101	0.000122934	0.000857317	0.00134656	0.00108245	0.00197727	0.000299974	0.000305602	0.000326945	0.00811066	0.000477695	0.000898305	0.00183223	2.85127e-06	0.000241357	9.00802e-06	0.013346	0.0034609	0.000880618	5.08136e-05	1.61751e-06	0.00218347	0.00492293	0.00499913	0.00510722	0.00525552	0.0137107
60	52	MA_47138_9803	0.0004173	0.00191761	0.00423931	0.00326094	0.00670981	0.00215374	0.000329254	0.00103	0.00141445	0.000274146	0.001183	0.00103585	0.00698467	0.00209449	0.000452231	0.000756183	0.00169922	0.00207419	0.00135056	0.000361754	0.00366046	0.00148772	0.000203892	0.000567798	0.00280197	0.00109461	0.000198455	0.000801604	0.0001779	0.00405632	0.00328008	0.00173972	0.00993612	0.0020338	0.000774347	2.74926e-07	0.00386903	9.29572e-05	0.000357688	2.11326e-07	0.000521178	0.00111079	0.00529207	0.00398827	0.0026538	0.00380273	0.0020312
61	53	MA_482092_7571	2.18046e-06	6.9496e-07	0.00138639	0.0034776	3.22473e-05	0.000140377	0.00175764	0.00020579	0.000290728	0.000266873	2.54116e-05	0.000151104	9.55666e-05	1.80324e-05	0.000925041	0.00058045	0.0070656	0.00573402	0.00120207	9.7361e-06	0.000229499	0.000874919	0.00282865	0.000485516	0.000913987	9.43068e-06	0.00201221	0.00107112	0.00244577	0.000841547	0.00727229	0.0032719	0.00378791	0.000179148	0.000315824	0.000533066	3.90007e-05	0.000855328	0.000184106	1.49229e-05	0.00126261	0.000128922	6.5672e-05	5.55608e-05	3.76979e-05	4.63529e-05	0.00203375
62	54	MA_5468_9193	0.00551737	4.55364e-05	0.00381503	0.00201964	0.00347833	0.00592284	6.96734e-05	6.92105e-05	0.233913	0.316182	1.91371e-05	0.00155508	0.00723396	0.00162163	0.000797334	9.35721e-05	0.00656105	0.00668695	0.000599087	5.52175e-05	2.95146e-06	0.0107842	0.00118831	0.00152895	0.00353526	0.000294711	0.00374036	0.000936018	0.0036487	0.00130171	0.00261485	0.00457276	1.14617e-05	0.000251065	1.93419e-05	0.000378666	0.0095922	0.0012716	5.34276e-05	0.000540737	0.000807747	0.00412308	0.000431416	0.000402019	0.000273651	0.000740453	0.00580937
63	55	MA_6124_7682	0.00120039	2.73478e-06	0.000957007	0.00784875	0.000747383	0.00218575	0.00413508	0.00194464	0.00156725	0.000924134	0.000294348	0.00027565	0.00139925	0.00306884	0.00340563	7.72817e-05	0.00163969	0.00169393	2.55261e-05	0.0018618	0.000545668	0.00609968	0.00118047	0.00155099	0.00472949	0.000458285	8.36918e-06	0.000191878	6.64796e-06	0.00043368	0.00479391	0.000314881	0.00113737	0.000898755	0.003246	9.67977e-05	0.00442214	0.00278669	0.00160582	0.000112593	0.000293638	0.00011121	0.000545896	0.000569621	0.000866679	0.000593723	0.00292706
64	56	MA_63888_14494	0.00423709	0.0743485	0.000502299	0.00318298	2.5617e-05	7.43251e-05	0.00024062	0.000473253	0.000495415	0.00110627	3.94764e-05	0.00736224	0.000221879	0.0043584	0.000267858	0.000288606	0.0928489	0.0892402	0.000918484	0.00142148	0.00242343	0.00020243	8.55647e-05	0.000587228	0.0012253	0.00484543	0.330026	0.211806	0.332989	0.000885878	2.07813e-05	7.78291e-05	0.000275913	0.000287876	4.94191e-05	2.87933e-05	0.000524094	0.00105133	0.00017646	0.00217089	2.97487e-05	0.000280609	0.00051915	0.00069347	0.000724312	0.000570573	0.0035659
65	56	MA_63888_14499	0.00438535	0.0754017	0.000479615	0.00310334	2.10163e-05	8.57169e-05	0.000230624	0.000511464	0.000544308	0.000945602	3.51815e-05	0.00755471	0.000199177	0.00420926	0.000247235	0.000275945	0.0922142	0.0886139	0.000962267	0.00140053	0.00230284	0.000170362	9.78742e-05	0.000611456	0.00126636	0.00491	0.331416	0.212979	0.334388	0.000876772	1.05234e-05	8.96368e-05	0.000249501	0.000307635	4.3846e-05	3.63776e-05	0.000475134	0.000973142	0.000199134	0.00223195	2.35036e-05	0.000298098	0.000550821	0.000730475	0.000762766	0.000602815	0.00385375
66	57	MA_64117_9434	0.00260931	0.00483728	0.00136282	0.0171778	0.00613662	0.00271204	0.00541888	0.00553175	0.00431854	0.00241699	2.10257e-06	0.00367213	0.00815982	0.0024662	0.00396892	0.00428446	0.000210191	0.000256948	0.00193424	0.000593214	0.00154245	0.00444146	0.00241812	0.000256587	0.00498427	0.000191285	0.000348591	0.000257745	0.000314623	0.00775216	0.00667404	0.000674396	0.00660132	9.1011e-05	0.00135051	0.00223031	0.0351193	0.00432015	0.00073852	0.000679268	1.68861e-05	0.000524249	0.00283744	0.00292868	0.0032177	0.00338578	0.00682237
67	58	MA_66354_1729	0.00311292	0.00129556	8.06277e-07	0.000242107	0.000575719	0.000673823	0.00040662	1.73253e-05	3.09259e-05	0.000188124	7.66998e-05	0.00234338	5.6573e-08	0.000256108	0.00494003	0.000407218	0.00132968	0.00105255	0.00157238	0.000622147	0.00162483	0.000654742	7.81019e-05	0.000639152	9.75766e-08	0.0010143	5.69832e-06	9.72415e-05	9.38582e-06	6.86221e-05	3.07191e-06	0.000629592	0.000675294	0.000214452	0.00102968	4.0846e-05	1.22937e-05	0.00224056	0.000408636	5.88818e-05	0.000721701	8.03315e-05	0.00493268	0.00496831	0.00533306	0.00209905	0.00122614
68	58	MA_66354_3299	0.00273582	0.000550416	8.06277e-07	0.00043203	0.000174369	0.000754933	0.000103718	1.73253e-05	1.30247e-05	2.61123e-05	1.75161e-06	0.00363176	0.000200404	6.20322e-05	0.00494003	0.000407218	0.000791448	0.000594007	0.00272085	0.00119466	0.00171826	0.000654742	0.000187318	0.000639152	5.33315e-05	0.0010143	5.56962e-05	0.000225243	6.59442e-05	3.11426e-06	3.07191e-06	0.000629592	0.00117498	5.72102e-05	0.00102968	4.79317e-05	2.90896e-05	0.00236631	0.00099698	1.60382e-05	0.000721701	8.03315e-05	0.00493268	0.00496831	0.00533306	0.00209905	0.0014832
69	59	MA_69436_29092	0.00139999	0.000789167	0.00255635	0.00805674	0.00196144	0.00318172	0.000912759	0.000688938	0.000824487	0.000636109	0.000172474	0.00789206	0.003628	0.00100806	0.000502237	0.00574698	0.00345729	0.0026946	0.0034607	9.76166e-11	0.00160081	0.00241106	0.00104154	0.000246863	0.0019366	0.000125449	0.00716251	0.00384972	0.00668068	0.00298718	0.00478176	0.00163447	0.000560977	0.00191643	6.85873e-05	0.000592441	0.00943927	0.0144199	0.00369681	0.00135669	0.000204412	0.00288982	0.00352289	0.00306355	0.00393909	0.00232698	0.00601886
70	60	MA_7188813_854	2.35136e-07	0.000282317	0.00103643	4.56984e-05	0.00281348	0.00562409	0.00200409	0.0020781	0.000658463	0.000291407	8.20663e-09	0.00273732	0.00316065	0.000204699	0.00284842	0.00193273	0.00354787	0.00350717	8.24146e-05	0.00241454	0.0038504	4.16805e-05	0.000135037	0.000588297	0.000830306	4.73168e-05	0.00144976	0.000290028	0.00147815	5.71653e-05	0.00318339	0.000958484	0.000284306	8.92037e-05	2.28075e-07	0.00215365	0.000794317	0.00642783	0.00243066	0.000106286	0.000166757	0.00248875	0.00395162	0.00397595	0.00429407	0.0040003	0.00483205
71	61	MA_7439660_2518	3.82014e-06	0.000406714	0.000636862	0.000208058	0.004804	0.000653336	0.00115808	3.86082e-05	0.000290436	0.000383471	2.26953e-05	0.000686581	7.95055e-05	0.000339177	3.38232e-05	0.000325318	0.000126354	2.53963e-05	0.00142792	0.00102453	8.11145e-06	0.00235341	1.50919e-06	0.000297779	0.000945207	0.000141927	9.14339e-05	2.23593e-06	2.13281e-05	0.00125208	0.000829887	0.00124185	0.00105739	0.000258105	0.00298782	5.87316e-05	1.41709e-05	4.03255e-05	0.00149939	0.000458036	0.000957887	2.66383e-07	0.000105467	0.000122619	6.71026e-05	6.58744e-07	0.000515201
72	62	MA_77420_25321	6.81758e-05	0.00135661	0.000547144	8.51474e-05	0.00182773	0.00133371	0.000420642	0.00428277	0.000599287	0.000839016	3.76153e-05	5.89547e-05	0.00052061	0.00280128	9.53097e-05	0.00111327	0.000314249	0.000333067	0.00204105	0.00039102	0.000210519	0.000719875	0.0014651	0.000590911	2.78024e-05	2.67665e-05	2.09672e-05	0.000521371	9.23605e-05	0.00279203	0.00157727	0.00478511	0.00133083	8.50308e-05	0.000380104	0.00347018	3.97115e-06	0.00117264	0.000407001	0.000150573	0.000466601	0.00159405	0.00259534	0.00261166	0.00282505	0.00262799	0.00288408
73	63	MA_8367646_2532	0.00808755	0.000602765	0.00230721	0.00520384	0.0139303	0.00362425	0.000552531	0.000157364	4.46511e-06	0.000120171	3.79718e-08	0.00575534	0.00138605	0.0039475	0.00148228	0.0130125	0.00121152	0.00125277	0.000475074	0.00126653	0.000896207	2.72128e-05	0.0068254	0.000239029	0.00479961	0.0071528	0.00803852	0.00264001	0.00792928	0.00481907	0.00635032	0.00163188	0.00266077	0.000820151	0.000163514	0.00048409	0.00840537	0.00553664	0.00206729	0.000282314	0.0014783	0.00514533	0.0213824	0.0206774	0.0223558	0.0233814	0.00586734
74	64	MA_876922_3616	0.000417797	0.481341	4.84455e-05	0.00771604	0.000289137	0.00181788	8.11831e-06	0.00051361	0.000126368	4.66387e-05	0.000731713	0.000324999	0.00374351	0.00113891	0.000579876	0.000597376	0.00889434	0.00820598	0.00100177	0.000777797	0.000649253	5.07951e-07	6.55907e-05	0.000889296	0.000123019	4.06537e-05	0.151102	0.221015	0.152086	0.00380951	0.00117515	0.000755341	0.000105433	0.00111944	0.000459404	0.000876737	0.00221537	0.000724571	1.49209e-05	0.000597611	0.000233419	0.000709356	9.68875e-05	0.000302856	0.00113506	0.00040648	7.11575e-05
75	65	MA_879701_2856	0.000301796	0.000321279	2.00738e-06	0.000484426	4.1595e-05	0.000509107	0.000741776	0.000261738	0.000293749	6.17922e-05	1.50593e-05	0.000156623	0.00034804	1.88631e-05	0.00124964	0.000504883	0.000111244	5.0735e-05	4.85139e-06	0.000240913	0.000662372	0.00021888	0.00084724	0.000997723	6.1764e-06	0.000378115	1.40796e-05	1.76425e-06	6.83376e-06	0.000274601	3.71046e-08	7.49319e-06	0.00283418	5.74577e-05	0.00285636	0.00146929	6.2947e-07	0.00150453	0.000349542	0.00334609	0.000873743	4.14158e-05	0.000540647	0.000658805	0.00205899	0.000726823	0.000335803
76	65	MA_879701_2922	0.000345743	0.00038517	0.000455479	0.000352369	3.5864e-06	0.000895679	0.000184679	0.000241805	0.000162517	3.92978e-05	0.000105019	0.000371257	0.000202493	1.16947e-05	0.000676928	5.843e-05	0.000148206	7.60448e-05	2.66519e-06	0.000249755	0.000917457	0.000540702	0.000488375	0.00101741	1.2909e-05	0.000707488	8.66882e-06	2.22722e-07	3.45293e-06	0.000464252	3.45781e-05	0.000126112	0.00231217	6.60126e-05	0.00256583	0.00113837	3.30504e-06	0.00190991	0.000968973	0.00350072	0.00134525	5.05867e-06	0.000863109	0.001039	0.00281587	0.00112693	0.000275618
77	66	MA_8861445_762	0.00125723	1.53739e-05	0.000150176	3.10868e-06	0.00245039	0.00336994	6.05077e-05	1.72623e-06	0.000811981	0.00126096	0.00121705	0.000629981	0.000616922	0.000316701	0.00177033	0.000212164	0.000191789	0.000173818	4.82378e-05	0.00102032	8.04617e-06	9.35579e-07	4.79175e-05	0.000219622	0.000774516	0.000196245	0.000131327	1.99077e-05	0.000119542	0.00850171	0.00424937	0.000854847	0.00404469	0.000249197	0.00134867	0.00150697	0.00560503	0.000839808	0.00225469	0.000330634	8.29018e-05	0.00132528	0.00344531	0.00346646	0.00178162	0.00144411	0.00377068
78	67	MA_8964699_5244	0.00334014	4.60339e-05	0.00821325	0.00476302	0.00163689	0.00184853	0.000892593	0.000623015	0.000669328	0.000723448	0.00213734	0.00324999	0.00571082	0.00446971	0.00128709	0.00507023	0.00383059	0.00304517	0.00314594	0.000575221	0.00341865	0.00573995	0.00157477	0.00101264	0.00204695	0.000446713	0.00626389	0.0028919	0.00567092	0.00824952	0.00144588	0.00736423	0.00282928	0.00116805	0.00178623	0.000341473	0.000737794	0.00581691	0.000582934	0.00279292	1.14385e-05	0.000557812	0.00571576	0.00603429	0.00599701	0.00851011	0.0119116
79	68	MA_9035900_2277	1.1069e-05	0.000511335	0.000193346	0.000574953	0.000485535	3.38019e-05	0.00447654	0.000101843	1.39538e-05	0.000180939	0.000358443	0.000244302	0.000143512	0.000188296	8.91754e-06	0.000203444	5.3142e-05	2.5211e-06	9.89922e-05	0.000108381	5.92031e-05	0.000264726	3.4606e-05	0.00110706	0.000133686	0.000360222	5.47945e-05	0.000147303	3.32395e-05	0.000828487	0.0021822	6.33932e-05	5.7893e-06	0.000125987	1.0921e-06	0.00158029	0.00048373	0.00397425	0.000154407	0.00262041	0.000242661	0.000272331	0.0032001	0.00263196	0.001706	0.00300827	3.65998e-05
80	69	MA_912814_5780	0.00120963	8.54832e-05	8.75424e-05	0.00201615	3.76878e-06	0.00223258	0.00076134	0.000202941	4.66706e-06	3.1931e-05	0.000379907	0.000749093	0.000280589	1.33944e-05	0.00384691	1.38222e-06	0.00132413	0.00108993	0.000398874	0.000167346	0.0024846	0.00342128	0.00153377	0.000560273	0.00065975	7.5125e-06	0.00252987	0.00132808	0.0024686	0.000948688	0.000684984	3.11336e-05	0.000771928	0.00272302	0.000883365	0.000179443	0.000143509	0.00139228	3.28863e-05	0.00518133	0.000607438	2.07038e-08	0.000101384	0.000248347	0.000377801	0.000392039	0.000660239
81	70	MA_9146503_3946	0.000345401	0.00155343	0.00114551	0.00428063	6.2277e-07	8.44969e-05	0.00096803	0.000550399	1.44755e-06	0.000497038	0.000379175	0.000240805	0.00251902	0.000764488	0.00149294	0.0010898	0.000391108	0.000494649	0.000254136	4.94111e-05	0.000237057	0.00121641	0.000164002	0.00153532	0.0044797	0.000546554	0.000610848	0.00154967	0.000585231	0.00789422	0.000140749	0.000347578	0.000112372	0.00206415	0.000379175	0.00203243	1.09221e-10	0.000937118	6.81963e-05	0.00239427	2.8052e-05	0.000492247	0.0012694	0.000512269	0.000550077	0.00052378	0.00192596
82	71	MA_9349488_789	0.00177551	0.00111209	0.00228486	0.00323233	0.00394994	0.0101061	0.0046578	0.00104572	4.59571e-05	3.82815e-08	4.85495e-05	2.48151e-06	0.00174261	0.0022527	0.000158449	0.00166071	0.00146551	0.0015239	0.000157312	1.46807e-05	0.00290873	8.70623e-06	0.00063647	0.00108428	0.00865096	0.000218247	0.00144218	0.000368147	0.00174021	0.00361061	0.00150966	0.00282815	0.00403372	0.000504809	3.80584e-07	0.000461341	0.00379444	0.00388666	1.52347e-05	0.00025678	0.000387223	0.00115931	0.00195637	0.00171532	0.00168272	0.00176038	0.00959789
83	72	MA_9448764_2532	7.80405e-05	0.000514695	8.95106e-06	0.00026626	0.0023605	0.000287759	8.87345e-05	1.93535e-05	0.000535345	0.00035742	0.000790171	0.0010336	0.00131203	6.39471e-05	0.00067947	0.000208352	9.46321e-05	2.43916e-05	0.000859348	0.00288667	0.000475007	0.000152414	0.00123674	0.000952414	1.57434e-05	7.54497e-05	0.000308212	5.95214e-05	0.000289358	6.56724e-05	0.00020174	0.00365294	0.000274571	8.00573e-07	0.00121855	0.00105009	6.12219e-05	0.000652142	0.000265413	6.49258e-06	0.00119538	3.29949e-05	0.000577783	0.000449044	8.60651e-05	0.000405919	3.79646e-06
84	73	MA_95898_47466	0.00173909	0.000159848	0.000996119	0.0109959	0.00699971	0.00988295	0.00152766	0.00482321	0.000234487	0.00017334	0.000237497	0.0169351	0.0108021	0.0107846	0.00251121	0.0040685	0.00179276	0.00181719	0.00121872	0.00174077	0.000686435	7.35015e-05	0.00141621	0.000857388	0.00408763	0.000395266	0.00599333	0.000378428	0.00578316	0.0035011	0.00699698	0.00246528	0.00199607	0.000143932	0.000121377	3.24929e-07	0.0151466	0.00921694	0.000999115	0.00231662	1.31104e-05	0.00455816	0.00784309	0.00789078	0.0102703	0.00783798	0.0187448
85	74	MA_9831023_767	0.000366042	0.00241672	0.00352656	0.0027603	0.00712425	0.00282585	0.00109297	0.000466267	0.000962786	0.000568289	0.000375043	0.00143831	0.0075597	0.00198788	0.000531521	0.000556115	0.00193218	0.00235025	0.000750977	0.00175679	0.00175159	0.00221339	0.000748116	0.00032337	0.00160902	0.000985708	0.000177872	0.000746155	0.000161738	0.00629163	0.00151472	0.000965328	0.00673332	0.000485106	0.000601096	9.42777e-08	0.00274489	0.000121857	4.10567e-05	0.000172438	0.000314611	0.000530963	0.00584744	0.00448521	0.00323028	0.00598858	0.000394291
86	74	MA_9831023_768	0.000366042	0.00241672	0.00352656	0.0027603	0.00712425	0.00282585	0.00109297	0.000466267	0.000962786	0.000568289	0.000375043	0.00143831	0.0075597	0.00198788	0.000531521	0.000556115	0.00193218	0.00235025	0.000750977	0.00175679	0.00175159	0.00221339	0.000748116	0.00032337	0.00160902	0.000985708	0.000177872	0.000746155	0.000161738	0.00629163	0.00151472	0.000965328	0.00673332	0.000485106	0.000601096	9.42777e-08	0.00274489	0.000121857	4.10567e-05	0.000172438	0.000314611	0.000530963	0.00584744	0.00448521	0.00323028	0.00598858	0.000394291
[truncated: 39 more columns]

## Sheet: Table S3 GWA SNPs
Table S3 Results of genome-wide association study (GWAS) for all wood quality traits.
order	Trait	Abbreviation	Wood type	Model type	Method	SNP	contig	Alleles	MAF	p-value	FDR p-value	Effect size	Vadd	Ve	Vphe	Traits_UV/MV	PVE (%)	p-value*	MFA*
1	Earlywood tangential tracheid width	ETTW	JW	Univariate	BLINK	MA_228591_5756	MA_228591	A/G	0.069	2.048e-07	0.0268557	-0.643385	0.789534	1.9368	2.72633	EW tangential tracheid width	1.95071	0.720225	0.08
2	Earlywood tangential tracheid width	ETTW	JW	Univariate	BLINK	MA_228591_5904	MA_228591	C/G	0.069	7.80812e-07	0.0420832	-0.619437	0.789534	1.9368	2.72633	EW tangential tracheid width	1.80819	0.675196	0.07
3	Earlywood tangential tracheid width	ETTW	JW	Univariate	BLINK	MA_228591_6113	MA_228591	G/C	0.074	1.2837e-06	0.0420832	-0.586625	0.789534	1.9368	2.72633	EW tangential tracheid width	1.72988	0.872154	0.08
4	Earlywood tangential tracheid width	ETTW	JW	Univariate	BLINK	MA_228591_6152	MA_228591	T/C	0.07	1.13454e-06	0.0420832	-0.599572	0.789534	1.9368	2.72633	EW tangential tracheid width	1.71678	0.720225	0.08
5	Latewood density	LWD	JW	Univariate	BLINK	MA_11005_24095	MA_11005	A/G	0.243	2.61372e-07	0.017137	9.42576	409.998	2042.61	2452.61	LW density	1.33271	0.747061	0.23
6	Latewood density	LWD	JW	Univariate	BLINK	MA_118436_1478	MA_118436	G/A	0.36	1.71516e-06	0.044982	-8.38015	409.998	2042.61	2452.61	LW density	1.31943	0.41047	0.64
7	Latewood density	LWD	JW	Univariate	BLINK	MA_14038_26748	MA_14038	A/G	0.068	5.3732e-07	0.0176148	15.6839	409.998	2042.61	2452.61	LW density	1.27127	0.340297	0.04
8	Latewood density	LWD	JW	Univariate	BLINK	MA_183273_8768	MA_183273	G/C	0.099	1.24972e-07	0.0163877	-16.3179	409.998	2042.61	2452.61	LW density	1.93682	0.579276	0.12
9	Latewood density	LWD	JW	Univariate	BLINK	MA_69436_29092	MA_69436	C/T	0.185	5.20344e-07	0.0176148	-9.35889	409.998	2042.61	2452.61	LW density	1.07691	0.436471	0.17
10	Annual ring wood microfibril angle	MFA	JW	Univariate	BLINK	MA_140464_12338	MA_140464	C/T	0.337	1.096e-07	0.014372	-0.814584	5.84703	14.0579	19.9049	ARW microfibril angle	1.48965	0.765697	0.67
11	Transition wood density	TWD	JW	Univariate	BLINK	MA_10277463_4132	MA_10277463	A/G	0.057	9.66045e-08	0.0126678	14.0517	257.967	1103.94	1361.91	TW density	1.55857	0.0468699	0.05
12	Earlywood density	EWD	JW	Univariate	UV_GEMMA	MA_12842_2389	MA_12842	T/A	0.109	9.22734e-08	0.00403327	12.1107	211.447	1093.41	1304.86	EW density	2.18328	0.121314	0.09
13	Earlywood density	EWD	JW	Univariate	UV_GEMMA	MA_12842_2476	MA_12842	C/G	0.147	5.1907e-08	0.00403327	10.8541	211.447	1093.41	1304.86	EW density	2.26423	0.160984	0.13
14	Earlywood density	EWD	JW	Univariate	UV_GEMMA	MA_12842_2490	MA_12842	C/G	0.109	6.61397e-08	0.00403327	12.1397	211.447	1093.41	1304.86	EW density	2.19374	0.175737	0.09
15	Latewood coarseness	LC	JW	Univariate	UV_GEMMA	MA_426944_681	MA_426944	C/T	0.071	1.27507e-06	0.0417999	14.4037	368.513	1202.73	1571.24	LW coarseness	1.74184	NA	0.49
16	Latewood coarseness	LC	JW	Univariate	UV_GEMMA	MA_482092_7571	MA_482092	G/A	0.049	4.25224e-08	0.00557596	19.0913	368.513	1202.73	1571.24	LW coarseness	2.1619	NA	0.36
17	Latewood wall thickness	LWT	JW	Univariate	UV_GEMMA	MA_482092_7571	MA_482092	G/A	0.049	1.66805e-07	0.0218731	0.124532	0.0155579	0.057654	0.0732119	LW wall thickness	1.97418	0.7801	0.05
18	Latewood coarseness	LC	JW	Univariate	UV_GEMMA	MA_66354_1729	MA_66354	A/G	0.064	6.46597e-07	0.0283939	15.8872	368.513	1202.73	1571.24	LW coarseness	1.92459	NA	0.46
19	Latewood coarseness	LC	JW	Univariate	UV_GEMMA	MA_66354_3299	MA_66354	A/C	0.064	6.49598e-07	0.0283939	15.9547	368.513	1202.73	1571.24	LW coarseness	1.94097	NA	0.5
20	Annual ring wood (Modulus of elasticity, wood density, microfibril angle)	ARW(MOE_WD_MFA)	JW	Multivariate	MV_GEMMA	MA_12842_2389	MA_12842	T/A	0.109	6.81203e-10	4.46631e-05	9.26621	185.409	964.079	1149.49	ARW density	1.45089	0.0926051	0.09
21	Annual ring wood (Modulus of elasticity, wood density, microfibril angle)	ARW(MOE_WD_MFA)	JW	Multivariate	MV_GEMMA	MA_12842_2389	MA_12842	T/A	0.109	6.81203e-10	4.46631e-05	1.07456	5.24144	10.8776	16.119	ARW microfibril angle	1.39143	0.088991	0.09
22	Annual ring wood (Modulus of elasticity, wood density, microfibril angle)	ARW(MOE_WD_MFA)	JW	Multivariate	MV_GEMMA	MA_12842_2389	MA_12842	T/A	0.109	6.81203e-10	4.46631e-05	-0.041679	0.472238	0.948619	1.42086	ARW modulus of elasticity	0.0237476	0.498198	0.09
23	Annual ring wood (Modulus of elasticity, wood density, microfibril angle)	ARW(MOE_WD_MFA)	JW	Multivariate	MV_GEMMA	MA_12842_2476	MA_12842	C/G	0.147	1.62169e-08	0.00070884	9.49093	185.409	964.079	1149.49	ARW density	1.96521	0.805476	0.13
24	Annual ring wood (Modulus of elasticity, wood density, microfibril angle)	ARW(MOE_WD_MFA)	JW	Multivariate	MV_GEMMA	MA_12842_2476	MA_12842	C/G	0.147	1.62169e-08	0.00070884	0.628775	5.24144	10.8776	16.119	ARW microfibril angle	0.615103	0.236344	0.13
25	Annual ring wood (Modulus of elasticity, wood density, microfibril angle)	ARW(MOE_WD_MFA)	JW	Multivariate	MV_GEMMA	MA_12842_2476	MA_12842	C/G	0.147	1.62169e-08	0.00070884	0.0494354	0.472238	0.948619	1.42086	ARW modulus of elasticity	0.0431343	0.765674	0.13
26	Annual ring wood (Modulus of elasticity, wood density, microfibril angle)	ARW(MOE_WD_MFA)	JW	Multivariate	MV_GEMMA	MA_12842_2490	MA_12842	C/G	0.109	3.00251e-10	3.93719e-05	9.41224	185.409	964.079	1149.49	ARW density	1.49698	0.950436	0.09
27	Annual ring wood (Modulus of elasticity, wood density, microfibril angle)	ARW(MOE_WD_MFA)	JW	Multivariate	MV_GEMMA	MA_12842_2490	MA_12842	C/G	0.109	3.00251e-10	3.93719e-05	1.03686	5.24144	10.8776	16.119	ARW microfibril angle	1.2955	0.194599	0.09
28	Annual ring wood (Modulus of elasticity, wood density, microfibril angle)	ARW(MOE_WD_MFA)	JW	Multivariate	MV_GEMMA	MA_12842_2490	MA_12842	C/G	0.109	3.00251e-10	3.93719e-05	-0.0243419	0.472238	0.948619	1.42086	ARW modulus of elasticity	0.00810015	0.671973	0.09
29	Wood density (Annual ring wood, earlywood, transition wood, latewood)	WD(ARW_EW_TW_LW)	JW	Multivariate	MV_GEMMA	MA_879701_2856	MA_879701	A/C	0.16	6.4541e-07	0.0423163	1.23078	175.6	942.662	1118.26	ARW density	0.0364123	0.0376085	0.15
30	Wood density (Annual ring wood, earlywood, transition wood, latewood)	WD(ARW_EW_TW_LW)	JW	Multivariate	MV_GEMMA	MA_879701_2856	MA_879701	A/C	0.16	6.4541e-07	0.0423163	0.890728	212.279	874.396	1086.67	EW density	0.0196255	0.682055	0.15
31	Wood density (Annual ring wood, earlywood, transition wood, latewood)	WD(ARW_EW_TW_LW)	JW	Multivariate	MV_GEMMA	MA_879701_2856	MA_879701	A/C	0.16	6.4541e-07	0.0423163	3.34916	457.924	1614.99	2072.91	LW density	0.145452	0.607536	0.15
32	Wood density (Annual ring wood, earlywood, transition wood, latewood)	WD(ARW_EW_TW_LW)	JW	Multivariate	MV_GEMMA	MA_879701_2856	MA_879701	A/C	0.16	6.4541e-07	0.0423163	-2.11475	198.503	888.732	1087.23	TW density	0.110567	0.95517	0.15
33	Wood density (Annual ring wood, earlywood, transition wood, latewood)	WD(ARW_EW_TW_LW)	JW	Multivariate	MV_GEMMA	MA_879701_2922	MA_879701	T/G	0.16	3.91109e-07	0.0423163	0.80353	175.6	942.662	1118.26	ARW density	0.0155199	0.108378	0.16
34	Wood density (Annual ring wood, earlywood, transition wood, latewood)	WD(ARW_EW_TW_LW)	JW	Multivariate	MV_GEMMA	MA_879701_2922	MA_879701	T/G	0.16	3.91109e-07	0.0423163	0.553796	212.279	874.396	1086.67	EW density	0.00758629	0.503877	0.16
35	Wood density (Annual ring wood, earlywood, transition wood, latewood)	WD(ARW_EW_TW_LW)	JW	Multivariate	MV_GEMMA	MA_879701_2922	MA_879701	T/G	0.16	3.91109e-07	0.0423163	2.64322	457.924	1614.99	2072.91	LW density	0.0905973	0.850303	0.16
36	Wood density (Annual ring wood, earlywood, transition wood, latewood)	WD(ARW_EW_TW_LW)	JW	Multivariate	MV_GEMMA	MA_879701_2922	MA_879701	T/G	0.16	3.91109e-07	0.0423163	-2.74137	198.503	888.732	1087.23	TW density	0.185798	0.69368	0.16
37	Annual ring wood (Number of cells, ring width, radial tracheid width)	ARW(NC_RW_RTW)	JW	Multivariate	MV_GEMMA	MA_77420_25321	MA_77420	C/T	0.036	1.39458e-07	0.0182871	2.26494	168.113	476.006	644.119	ARW number of cells	0.0552788	NA	0.05
38	Annual ring wood (Number of cells, ring width, radial tracheid width)	ARW(NC_RW_RTW)	JW	Multivariate	MV_GEMMA	MA_77420_25321	MA_77420	C/T	0.036	1.39458e-07	0.0182871	0.382243	0.0197193	1.85296	1.87268	ARW radial tracheid width	0.541533	0.57998	0.05
39	Annual ring wood (Number of cells, ring width, radial tracheid width)	ARW(NC_RW_RTW)	JW	Multivariate	MV_GEMMA	MA_77420_25321	MA_77420	C/T	0.036	1.39458e-07	0.0182871	0.0646581	0.113967	0.430265	0.544232	ARW Ring width	0.0533177	0.636239	0.05
40	Earlywood density	EWD	MW	Univariate	BLINK	MA_10428113_5084	MA_10428113	A/G	0.44	5.97021e-07	0.0156576	1.06316	368.744	550.419	919.163	EW density	0.0606008	0.558173	0.42
41	Earlywood density	EWD	MW	Univariate	BLINK	MA_113808_27662	MA_113808	G/A	0.289	1.32789e-06	0.0290213	-2.71605	368.744	550.419	919.163	EW density	0.329823	0.495682	0.28
42	Earlywood density	EWD	MW	Univariate	BLINK	MA_113962_5891	MA_113962	T/G	0.089	2.99096e-08	0.00130736	3.30552	368.744	550.419	919.163	EW density	0.192764	0.36414	0.1
43	Earlywood density	EWD	MW	Univariate	BLINK	MA_12842_2389	MA_12842	T/A	0.109	6.07306e-09	0.000796367	3.67259	368.744	550.419	919.163	EW density	0.285027	0.543942	0.09
44	Earlywood radial tracheid width	ERTW	MW	Univariate	BLINK	MA_12842_2389	MA_12842	T/A	0.109	5.88339e-10	7.71495e-05	-0.289861	4.62209e-05	4.62209	4.62214	EW radial tracheid width	0.353079	0.48433	0.09
45	Earlywood density	EWD	MW	Univariate	BLINK	MA_17597_20684	MA_17597	A/G	0.174	1.59837e-07	0.00523988	-0.834735	368.744	550.419	919.163	EW density	0.0217903	0.943622	0.85
46	Earlywood density	EWD	MW	Univariate	BLINK	MA_25654_27839	MA_25654	A/G	0.493	1.2766e-08	0.000837007	-0.24184	368.744	550.419	919.163	EW density	0.00318089	0.225061	0.5
47	Annual ring wood density	WD	MW	Univariate	BLINK	MA_25654_27839	MA_25654	A/G	0.493	5.36568e-08	0.00703606	0.353639	922.847	1784.26	2707.11	ARW density	0.0023094	0.421211	0.5
48	Earlywood radial tracheid width	ERTW	MW	Univariate	BLINK	MA_7439660_2518	MA_7439660	G/A	0.068	2.18504e-07	0.0143264	-0.063373	4.62209e-05	4.62209	4.62214	EW radial tracheid width	0.0110134	0.251272	0.07
49	Earlywood wall thickness	EWT	MW	Univariate	BLINK	MA_7188813_854	MA_7188813	G/A	0.052	4.50746e-07	0.0295534	0.0055678	0.00848175	0.0154533	0.023935	EW wall thickness	0.0127695	0.388672	0.05
50	Earlywood wall thickness	EWT	MW	Univariate	BLINK	MA_9448764_2532	MA_9448764	C/A	0.48	2.29015e-07	0.0295534	-0.0102676	0.00848175	0.0154533	0.023935	EW wall thickness	0.219875	0.424475	0.54
51	Latewood coarseness	LC	MW	Univariate	BLINK	MA_8964699_5244	MA_8964699	C/T	0.472	6.06671e-09	0.000795534	-3.2205	822.052	2832.07	3654.12	LW coarseness	0.141471	0.0378255	0.47
52	Latewood coarseness	LC	MW	Univariate	BLINK	MA_95898_47466	MA_95898	A/G	0.419	9.8084e-08	0.00643093	-1.09817	822.052	2832.07	3654.12	LW coarseness	0.0160685	0.161979	0.41
53	Latewood density	LWD	MW	Univariate	BLINK	MA_360415_6124	MA_360415	G/A	0.036	1.86332e-07	0.0244338	-5.61064	1457.14	2713.42	4170.56	LW density	0.052389	0.85849	0.04
54	Latewood ring width	LRW	MW	Univariate	BLINK	MA_10432667_767	MA_10432667	G/A	0.138	4.79698e-07	0.0314517	-0.0051909	0.00176654	0.00544972	0.00721626	LW ring width	0.0888359	0.136265	0.12
55	Latewood ring width	LRW	MW	Univariate	BLINK	MA_139242_9326	MA_139242	G/A	0.271	1.0894e-08	0.00142854	-0.00423549	0.00176654	0.00544972	0.00721626	LW ring width	0.0982248	0.608985	0.27
56	Transition wood density	TWD	MW	Univariate	BLINK	MA_9146503_3946	MA_9146503	C/G	0.042	2.91219e-07	0.0381878	2.37889	880.823	1395.71	2276.53	TW density	0.0200041	0.431991	0.04
57	Transition wood wall thickness	TWT	MW	Univariate	BLINK	MA_10432069_9424	MA_10432069	C/T	0.147	1.22944e-07	0.0161217	0.0170555	0.019592	0.041178	0.06077	TW wall thickness	0.120043	0.851586	0.16
58	Earlywood ring width	ERW	MW	Univariate	UV_GEMMA	MA_125978_3122	MA_125978	A/G	0.03	1.99114e-07	0.0261099	0.34368	0.0321492	0.284506	0.316655	EW radial tracheid width	2.17093	0.924355	0.04
59	Earlywood number of cells	ENC	MW	Univariate	UV_GEMMA	MA_125978_3122	MA_125978	A/G	0.03	6.07915e-08	0.00797159	9.9438	26.4032	218.207	244.61	EW number of cells	2.35263	0.989721	0.04
60	Latewood ring width	LRW	MW	Univariate	UV_GEMMA	MA_10431885_2231	MA_10431885	C/T	0.03	6.56374e-08	0.00860704	0.0540928	0.00176654	0.00544972	0.00721626	LW ring width	2.35988	0.803098	0.04
61	Latewood number of cells	LNC	MW	Univariate	UV_GEMMA	MA_10431885_2231	MA_10431885	C/T	0.03	3.48779e-07	0.0174315	2.21422	3.63297	9.96668	13.5997	LW number of cells	2.09814	0.176976	0.04
62	Latewood ring width	LRW	MW	Univariate	UV_GEMMA	MA_108175_933	MA_108175	T/C	0.075	2.13681e-06	0.0467	0.0300256	0.00176654	0.00544972	0.00721626	LW ring width	1.73342	0.90855	0.07
63	Latewood ring width	LRW	MW	Univariate	UV_GEMMA	MA_108928_3179	MA_108928	A/C	0.034	6.88514e-07	0.0225712	0.0441098	0.00176654	0.00544972	0.00721626	LW ring width	1.7711	0.513371	0.05
64	Latewood ring width	LRW	MW	Univariate	UV_GEMMA	MA_184308_3458	MA_184308	G/A	0.068	4.78494e-07	0.020915	0.0326981	0.00176654	0.00544972	0.00721626	LW ring width	1.87796	0.672654	0.07
65	Latewood number of cells	LNC	MW	Univariate	UV_GEMMA	MA_184308_3458	MA_184308	G/A	0.068	3.988e-07	0.0174315	1.42817	3.63297	9.96668	13.5997	LW number of cells	1.90102	0.697143	0.07
66	Latewood ring width	LRW	MW	Univariate	UV_GEMMA	MA_330891_664	MA_330891	G/A	0.104	1.781e-06	0.0467	0.025504	0.00176654	0.00544972	0.00721626	LW ring width	1.67987	0.296677	0.11
67	Latewood ring width	LRW	MW	Univariate	UV_GEMMA	MA_6124_7682	MA_6124	A/G	0.043	2.4608e-07	0.0161342	0.0419811	0.00176654	0.00544972	0.00721626	LW ring width	2.01005	0.197484	0.04
68	Latewood number of cells	LNC	MW	Univariate	UV_GEMMA	MA_6124_7682	MA_6124	A/G	0.043	3.89165e-08	0.00510313	1.93868	3.63297	9.96668	13.5997	LW number of cells	2.27454	0.159164	0.04
69	Annual ring wood wall thickness	WT	MW	Univariate	UV_GEMMA	MA_8861445_762	MA_8861445	T/C	0.046	3.03774e-07	0.0398338	0.122337	0.0192693	0.041517	0.0607863	ARW wall thickness	2.16095	0.282615	0.04
70	Earlywood (Coarseness, wood density, radial tracheid width, tangential tracheid width)	EW(C_WD_RTW_TTW)	MW	Multivariate	MV_GEMMA	MA_12842_2389	MA_12842	T/A	0.109	3.55692e-10	3.27153e-05	0.233054	231.013	749.956	980.969	EW coarseness	0.00107546	0.869957	0.09
71	Earlywood (Coarseness, wood density, radial tracheid width, tangential tracheid width)	EW(C_WD_RTW_TTW)	MW	Multivariate	MV_GEMMA	MA_12842_2389	MA_12842	T/A	0.109	3.55692e-10	3.27153e-05	11.1928	285.964	629.469	915.433	EW density	2.65817	0.543942	0.09
72	Earlywood (Coarseness, wood density, radial tracheid width, tangential tracheid width)	EW(C_WD_RTW_TTW)	MW	Multivariate	MV_GEMMA	MA_12842_2389	MA_12842	T/A	0.109	3.55692e-10	3.27153e-05	-0.743606	4.62248e-05	4.62209	4.62214	EW radial tracheid width	2.32369	0.48433	0.09
73	Earlywood (Coarseness, wood density, radial tracheid width, tangential tracheid width)	EW(C_WD_RTW_TTW)	MW	Multivariate	MV_GEMMA	MA_12842_2389	MA_12842	T/A	0.109	3.55692e-10	3.27153e-05	-0.42344	2.91714e-05	2.91112	2.91115	EW tangential tracheid width	1.19633	0.755991	0.09
74	Earlywood (Coarseness, wood density, radial tracheid width, tangential tracheid width)	EW(C_WD_RTW_TTW)	MW	Multivariate	MV_GEMMA	MA_12842_2476	MA_12842	C/G	0.147	1.56849e-08	0.000685588	-4.13957	231.013	749.956	980.969	EW coarseness	0.438078	0.919613	0.13
75	Earlywood (Coarseness, wood density, radial tracheid width, tangential tracheid width)	EW(C_WD_RTW_TTW)	MW	Multivariate	MV_GEMMA	MA_12842_2476	MA_12842	C/G	0.147	1.56849e-08	0.000685588	-6.10725	285.964	629.469	915.433	EW density	1.02179	0.524841	0.13
76	Earlywood (Coarseness, wood density, radial tracheid width, tangential tracheid width)	EW(C_WD_RTW_TTW)	MW	Multivariate	MV_GEMMA	MA_12842_2476	MA_12842	C/G	0.147	1.56849e-08	0.000685588	0.154939	4.62248e-05	4.62209	4.62214	EW radial tracheid width	0.130249	0.349869	0.13
77	Earlywood (Coarseness, wood density, radial tracheid width, tangential tracheid width)	EW(C_WD_RTW_TTW)	MW	Multivariate	MV_GEMMA	MA_12842_2476	MA_12842	C/G	0.147	1.56849e-08	0.000685588	0.0244978	2.91714e-05	2.91112	2.91115	EW tangential tracheid width	0.00516996	0.592951	0.13
78	Earlywood (Coarseness, wood density, radial tracheid width, tangential tracheid width)	EW(C_WD_RTW_TTW)	MW	Multivariate	MV_GEMMA	MA_12842_2490	MA_12842	C/G	0.109	4.98975e-10	3.27153e-05	0.372898	231.013	749.956	980.969	EW coarseness	0.00275333	0.939414	0.09
79	Earlywood (Coarseness, wood density, radial tracheid width, tangential tracheid width)	EW(C_WD_RTW_TTW)	MW	Multivariate	MV_GEMMA	MA_12842_2490	MA_12842	C/G	0.109	4.98975e-10	3.27153e-05	11.069	285.964	629.469	915.433	EW density	2.59969	0.582573	0.09
80	Earlywood (Coarseness, wood density, radial tracheid width, tangential tracheid width)	EW(C_WD_RTW_TTW)	MW	Multivariate	MV_GEMMA	MA_12842_2490	MA_12842	C/G	0.109	4.98975e-10	3.27153e-05	-0.72982	4.62248e-05	4.62209	4.62214	EW radial tracheid width	2.23832	0.38607	0.09
81	Earlywood (Coarseness, wood density, radial tracheid width, tangential tracheid width)	EW(C_WD_RTW_TTW)	MW	Multivariate	MV_GEMMA	MA_12842_2490	MA_12842	C/G	0.109	4.98975e-10	3.27153e-05	-0.409533	2.91714e-05	2.91112	2.91115	EW tangential tracheid width	1.11904	0.901077	0.09
82	Earlywood (Ring width, wood density, coarseness, number of cells)	EW(RW_WD_C_NC)	MW	Multivariate	MV_GEMMA	MA_12842_2389	MA_12842	T/A	0.109	1.98349e-09	0.000260095	0.127753	192.094	563.963	756.057	EW coarseness	0.000419297	0.869957	0.09
83	Earlywood (Ring width, wood density, coarseness, number of cells)	EW(RW_WD_C_NC)	MW	Multivariate	MV_GEMMA	MA_12842_2389	MA_12842	T/A	0.109	1.98349e-09	0.000260095	11.3801	354.493	783.012	1137.5	EW density	2.21141	0.543942	0.09
84	Earlywood (Ring width, wood density, coarseness, number of cells)	EW(RW_WD_C_NC)	MW	Multivariate	MV_GEMMA	MA_12842_2389	MA_12842	T/A	0.109	1.98349e-09	0.000260095	-2.25066	23.8759	219.945	243.821	EW number of cells	0.403537	0.590667	0.09
85	Earlywood (Ring width, wood density, coarseness, number of cells)	EW(RW_WD_C_NC)	MW	Multivariate	MV_GEMMA	MA_12842_2389	MA_12842	T/A	0.109	1.98349e-09	0.000260095	-0.0972512	0.0296968	0.286002	0.315699	EW ring width	0.581904	0.523698	0.09
86	Earlywood (Ring width, wood density, coarseness, number of cells)	EW(RW_WD_C_NC)	MW	Multivariate	MV_GEMMA	MA_12842_2476	MA_12842	C/G	0.147	1.3624e-08	0.000595506	0.29791	192.094	563.963	756.057	EW coarseness	0.00294383	0.919613	0.13
87	Earlywood (Ring width, wood density, coarseness, number of cells)	EW(RW_WD_C_NC)	MW	Multivariate	MV_GEMMA	MA_12842_2476	MA_12842	C/G	0.147	1.3624e-08	0.000595506	9.76537	354.493	783.012	1137.5	EW density	2.10243	0.524841	0.13
88	Earlywood (Ring width, wood density, coarseness, number of cells)	EW(RW_WD_C_NC)	MW	Multivariate	MV_GEMMA	MA_12842_2476	MA_12842	C/G	0.147	1.3624e-08	0.000595506	-1.82573	23.8759	219.945	243.821	EW number of cells	0.342844	0.0548146	0.13
89	Earlywood (Ring width, wood density, coarseness, number of cells)	EW(RW_WD_C_NC)	MW	Multivariate	MV_GEMMA	MA_12842_2476	MA_12842	C/G	0.147	1.3624e-08	0.000595506	-0.078398	0.0296968	0.286002	0.315699	EW ring width	0.48824	0.044944	0.13
90	Earlywood (Ring width, wood density, coarseness, number of cells)	EW(RW_WD_C_NC)	MW	Multivariate	MV_GEMMA	MA_12842_2490	MA_12842	C/G	0.109	5.29739e-09	0.000347323	0.271019	192.094	563.963	756.057	EW coarseness	0.00188703	0.939414	0.09
91	Earlywood (Ring width, wood density, coarseness, number of cells)	EW(RW_WD_C_NC)	MW	Multivariate	MV_GEMMA	MA_12842_2490	MA_12842	C/G	0.109	5.29739e-09	0.000347323	11.2652	354.493	783.012	1137.5	EW density	2.16699	0.582573	0.09
92	Earlywood (Ring width, wood density, coarseness, number of cells)	EW(RW_WD_C_NC)	MW	Multivariate	MV_GEMMA	MA_12842_2490	MA_12842	C/G	0.109	5.29739e-09	0.000347323	-2.25069	23.8759	219.945	243.821	EW number of cells	0.403548	0.547676	0.09
93	Earlywood (Ring width, wood density, coarseness, number of cells)	EW(RW_WD_C_NC)	MW	Multivariate	MV_GEMMA	MA_12842_2490	MA_12842	C/G	0.109	5.29739e-09	0.000347323	-0.0968181	0.0296968	0.286002	0.315699	EW ring width	0.576732	0.470116	0.09
94	Earlywood (Number of cells, ring width, radial tracheid width)	EW(NC_RW_RTW)	MW	Multivariate	MV_GEMMA	MA_12842_2389	MA_12842	T/A	0.109	9.08248e-08	0.00830477	-2.37502	33.3183	135.245	168.563	EW number of cells	0.649988	0.590667	0.09
95	Earlywood (Number of cells, ring width, radial tracheid width)	EW(NC_RW_RTW)	MW	Multivariate	MV_GEMMA	MA_12842_2389	MA_12842	T/A	0.109	9.08248e-08	0.00830477	-0.761491	0.49359	3.70652	4.20011	EW radial tracheid width	2.68166	0.869957	0.09
96	Earlywood (Number of cells, ring width, radial tracheid width)	EW(NC_RW_RTW)	MW	Multivariate	MV_GEMMA	MA_12842_2389	MA_12842	T/A	0.109	9.08248e-08	0.00830477	-0.100449	0.0365143	3.70652	3.74303	EW ring width	0.0523607	0.523698	0.09
97	Earlywood (Number of cells, ring width, radial tracheid width)	EW(NC_RW_RTW)	MW	Multivariate	MV_GEMMA	MA_12842_2490	MA_12842	C/G	0.109	1.26665e-07	0.00830477	-2.36958	33.3183	135.245	168.563	EW number of cells	0.647014	0.547676	0.09
98	Earlywood (Number of cells, ring width, radial tracheid width)	EW(NC_RW_RTW)	MW	Multivariate	MV_GEMMA	MA_12842_2490	MA_12842	C/G	0.109	1.26665e-07	0.00830477	-0.74637	0.49359	3.70652	4.20011	EW radial tracheid width	2.57621	0.939414	0.09
99	Earlywood (Number of cells, ring width, radial tracheid width)	EW(NC_RW_RTW)	MW	Multivariate	MV_GEMMA	MA_12842_2490	MA_12842	C/G	0.109	1.26665e-07	0.00830477	-0.0998181	0.0365143	3.70652	3.74303	EW ring width	0.0517045	0.470116	0.09
100	Wood density (Annual ring wood, earlywood, transition wood, latewood)	WD(ARW_EW_TW_LW)	MW	Multivariate	MV_GEMMA	MA_12842_2389	MA_12842	T/A	0.109	4.48083e-08	0.00322924	8.67239	794.157	1475.91	2270.07	TW density	0.643537	0.95629	0.09
101	Wood density (Annual ring wood, earlywood, transition wood, latewood)	WD(ARW_EW_TW_LW)	MW	Multivariate	MV_GEMMA	MA_12842_2389	MA_12842	T/A	0.109	4.48083e-08	0.00322924	14.0616	756.851	1940.47	2697.32	ARW density	1.42388	0.771382	0.09
102	Wood density (Annual ring wood, earlywood, transition wood, latewood)	WD(ARW_EW_TW_LW)	MW	Multivariate	MV_GEMMA	MA_12842_2389	MA_12842	T/A	0.109	4.48083e-08	0.00322924	11.4068	298.936	616.381	915.317	EW density	2.76117	0.543942	0.09
103	Wood density (Annual ring wood, earlywood, transition wood, latewood)	WD(ARW_EW_TW_LW)	MW	Multivariate	MV_GEMMA	MA_12842_2389	MA_12842	T/A	0.109	4.48083e-08	0.00322924	9.1798	1467.98	2700.29	4168.27	LW density	0.392686	0.942165	0.09
104	Wood density (Annual ring wood, earlywood, transition wood, latewood)	WD(ARW_EW_TW_LW)	MW	Multivariate	MV_GEMMA	MA_12842_2476	MA_12842	C/G	0.147	3.57523e-07	0.0156273	8.32636	794.157	1475.91	2270.07	TW density	0.765893	0.869944	0.13
105	Wood density (Annual ring wood, earlywood, transition wood, latewood)	WD(ARW_EW_TW_LW)	MW	Multivariate	MV_GEMMA	MA_12842_2476	MA_12842	C/G	0.147	3.57523e-07	0.0156273	12.4752	756.851	1940.47	2697.32	ARW density	1.44697	0.420423	0.13
106	Wood density (Annual ring wood, earlywood, transition wood, latewood)	WD(ARW_EW_TW_LW)	MW	Multivariate	MV_GEMMA	MA_12842_2476	MA_12842	C/G	0.147	3.57523e-07	0.0156273	9.70857	298.936	616.381	915.317	EW density	2.58247	0.524841	0.13
107	Wood density (Annual ring wood, earlywood, transition wood, latewood)	WD(ARW_EW_TW_LW)	MW	Multivariate	MV_GEMMA	MA_12842_2476	MA_12842	C/G	0.147	3.57523e-07	0.0156273	8.63577	1467.98	2700.29	4168.27	LW density	0.448686	0.673761	0.13
108	Wood density (Annual ring wood, earlywood, transition wood, latewood)	WD(ARW_EW_TW_LW)	MW	Multivariate	MV_GEMMA	MA_12842_2490	MA_12842	C/G	0.109	4.92525e-08	0.00322924	8.6106	794.157	1475.91	2270.07	TW density	0.634399	0.721748	0.09
109	Wood density (Annual ring wood, earlywood, transition wood, latewood)	WD(ARW_EW_TW_LW)	MW	Multivariate	MV_GEMMA	MA_12842_2490	MA_12842	C/G	0.109	4.92525e-08	0.00322924	13.9065	756.851	1940.47	2697.32	ARW density	1.39263	0.741423	0.09
110	Wood density (Annual ring wood, earlywood, transition wood, latewood)	WD(ARW_EW_TW_LW)	MW	Multivariate	MV_GEMMA	MA_12842_2490	MA_12842	C/G	0.109	4.92525e-08	0.00322924	11.2871	298.936	616.381	915.317	EW density	2.7035	0.582573	0.09
111	Wood density (Annual ring wood, earlywood, transition wood, latewood)	WD(ARW_EW_TW_LW)	MW	Multivariate	MV_GEMMA	MA_12842_2490	MA_12842	C/G	0.109	4.92525e-08	0.00322924	9.17839	1467.98	2700.29	4168.27	LW density	0.392565	0.859542	0.09
112	Annual ring wood (Coarseness, wood density, radial tracheid width, tangential tracheid width)	ARW(C_WD_RTW_TTW)	MW	Multivariate	MV_GEMMA	MA_12842_2389	MA_12842	T/A	0.109	3.53643e-07	0.0226099	-1.27436	319.305	1055.5	1374.81	ARW coarseness	0.0229445	0.61494	0.09
113	Annual ring wood (Coarseness, wood density, radial tracheid width, tangential tracheid width)	ARW(C_WD_RTW_TTW)	MW	Multivariate	MV_GEMMA	MA_12842_2389	MA_12842	T/A	0.109	3.53643e-07	0.0226099	13.5889	996.872	1714.61	2711.48	ARW density	1.32281	0.771382	0.09
114	Annual ring wood (Coarseness, wood density, radial tracheid width, tangential tracheid width)	ARW(C_WD_RTW_TTW)	MW	Multivariate	MV_GEMMA	MA_12842_2389	MA_12842	T/A	0.109	3.53643e-07	0.0226099	-0.672418	0.178975	4.82232	5.0013	ARW radial tracheid width	1.75603	0.357841	0.09
115	Annual ring wood (Coarseness, wood density, radial tracheid width, tangential tracheid width)	ARW(C_WD_RTW_TTW)	MW	Multivariate	MV_GEMMA	MA_12842_2389	MA_12842	T/A	0.109	3.53643e-07	0.0226099	-0.391293	0.34535	2.22826	2.57361	ARW tangential tracheid width	1.15557	0.669035	0.09
116	Annual ring wood (Coarseness, wood density, radial tracheid width, tangential tracheid width)	ARW(C_WD_RTW_TTW)	MW	Multivariate	MV_GEMMA	MA_12842_2490	MA_12842	C/G	0.109	5.17271e-07	0.0226099	-1.12568	319.305	1055.5	1374.81	ARW coarseness	0.0179028	0.659133	0.09
117	Annual ring wood (Coarseness, wood density, radial tracheid width, tangential tracheid width)	ARW(C_WD_RTW_TTW)	MW	Multivariate	MV_GEMMA	MA_12842_2490	MA_12842	C/G	0.109	5.17271e-07	0.0226099	13.4559	996.872	1714.61	2711.48	ARW density	1.29705	0.741423	0.09
118	Annual ring wood (Coarseness, wood density, radial tracheid width, tangential tracheid width)	ARW(C_WD_RTW_TTW)	MW	Multivariate	MV_GEMMA	MA_12842_2490	MA_12842	C/G	0.109	5.17271e-07	0.0226099	-0.659908	0.178975	4.82232	5.0013	ARW radial tracheid width	1.69129	0.29455	0.09
119	Annual ring wood (Coarseness, wood density, radial tracheid width, tangential tracheid width)	ARW(C_WD_RTW_TTW)	MW	Multivariate	MV_GEMMA	MA_12842_2490	MA_12842	C/G	0.109	5.17271e-07	0.0226099	-0.380786	0.34535	2.22826	2.57361	ARW tangential tracheid width	1.09435	0.85128	0.09
120	Earlywood (Coarseness, wood density, radial tracheid width, tangential tracheid width)	EW(C_WD_RTW_TTW)	MW	Multivariate	MV_GEMMA	MA_114314_7847	MA_114314	C/T	0.044	1.8601e-06	0.0487829	-7.87964	231.013	749.956	980.969	EW coarseness	0.532473	0.233525	0.03
121	Earlywood (Coarseness, wood density, radial tracheid width, tangential tracheid width)	EW(C_WD_RTW_TTW)	MW	Multivariate	MV_GEMMA	MA_114314_7847	MA_114314	C/T	0.044	1.8601e-06	0.0487829	0.747572	285.964	629.469	915.433	EW density	0.00513595	0.579508	0.03
122	Earlywood (Coarseness, wood density, radial tracheid width, tangential tracheid width)	EW(C_WD_RTW_TTW)	MW	Multivariate	MV_GEMMA	MA_114314_7847	MA_114314	C/T	0.044	1.8601e-06	0.0487829	-0.566186	4.62248e-05	4.62209	4.62214	EW radial tracheid width	0.583467	0.123901	0.03
123	Earlywood (Coarseness, wood density, radial tracheid width, tangential tracheid width)	EW(C_WD_RTW_TTW)	MW	Multivariate	MV_GEMMA	MA_114314_7847	MA_114314	C/T	0.044	1.8601e-06	0.0487829	-0.140105	2.91714e-05	2.91112	2.91115	EW tangential tracheid width	0.0567265	0.432048	0.03
124	Earlywood (Coarseness, wood density, radial tracheid width, tangential tracheid width)	EW(C_WD_RTW_TTW)	MW	Multivariate	MV_GEMMA	MA_15237_12985	MA_15237	C/G	0.029	2.97765e-07	0.00976148	3.2222	231.013	749.956	980.969	EW coarseness	0.059607	0.599929	0.03
125	Earlywood (Coarseness, wood density, radial tracheid width, tangential tracheid width)	EW(C_WD_RTW_TTW)	MW	Multivariate	MV_GEMMA	MA_15237_12985	MA_15237	C/G	0.029	2.97765e-07	0.00976148	-8.93954	285.964	629.469	915.433	EW density	0.491645	0.149351	0.03
126	Earlywood (Coarseness, wood density, radial tracheid width, tangential tracheid width)	EW(C_WD_RTW_TTW)	MW	Multivariate	MV_GEMMA	MA_15237_12985	MA_15237	C/G	0.029	2.97765e-07	0.00976148	1.08493	4.62248e-05	4.62209	4.62214	EW radial tracheid width	1.43421	0.376947	0.03
127	Earlywood (Coarseness, wood density, radial tracheid width, tangential tracheid width)	EW(C_WD_RTW_TTW)	MW	Multivariate	MV_GEMMA	MA_15237_12985	MA_15237	C/G	0.029	2.97765e-07	0.00976148	0.434313	2.91714e-05	2.91112	2.91115	EW tangential tracheid width	0.364913	0.0862414	0.03
128	Annual ring wood (Coarseness, wood density, radial tracheid width, tangential tracheid width)	ARW(C_WD_RTW_TTW)	MW	Multivariate	MV_GEMMA	MA_912814_5780	MA_912814	G/A	0.043	2.27866e-07	0.0226099	12.5318	319.305	1055.5	1374.81	ARW coarseness	0.940142	0.270658	0.04
129	Annual ring wood (Coarseness, wood density, radial tracheid width, tangential tracheid width)	ARW(C_WD_RTW_TTW)	MW	Multivariate	MV_GEMMA	MA_912814_5780	MA_912814	G/A	0.043	2.27866e-07	0.0226099	14.1585	996.872	1714.61	2711.48	ARW density	0.608464	0.473368	0.04
130	Annual ring wood (Coarseness, wood density, radial tracheid width, tangential tracheid width)	ARW(C_WD_RTW_TTW)	MW	Multivariate	MV_GEMMA	MA_912814_5780	MA_912814	G/A	0.043	2.27866e-07	0.0226099	-0.464916	0.178975	4.82232	5.0013	ARW radial tracheid width	0.355694	0.880901	0.04
131	Annual ring wood (Coarseness, wood density, radial tracheid width, tangential tracheid width)	ARW(C_WD_RTW_TTW)	MW	Multivariate	MV_GEMMA	MA_912814_5780	MA_912814	G/A	0.043	2.27866e-07	0.0226099	0.423923	0.34535	2.22826	2.57361	ARW tangential tracheid width	0.574702	0.93814	0.04
132	Transition wood (Ring width, wood density, coarseness, number of cells)	TW(RW_WD_C_NC)	MW	Multivariate	MV_GEMMA	MA_8367646_2532	MA_8367646	T/C	0.038	2.0012e-07	0.0262417	-11.7736	229.701	1634.01	1863.71	TW coarseness	0.543786	0.203243	0.04
133	Transition wood (Ring width, wood density, coarseness, number of cells)	TW(RW_WD_C_NC)	MW	Multivariate	MV_GEMMA	MA_8367646_2532	MA_8367646	T/C	0.038	2.0012e-07	0.0262417	-15.4659	1038.18	1246.7	2284.88	TW density	0.76538	0.290552	0.04
134	Transition wood (Ring width, wood density, coarseness, number of cells)	TW(RW_WD_C_NC)	MW	Multivariate	MV_GEMMA	MA_8367646_2532	MA_8367646	T/C	0.038	2.0012e-07	0.0262417	1.90703	33.3656	198.176	231.542	TW number of cells	0.114835	0.162692	0.04
135	Transition wood (Ring width, wood density, coarseness, number of cells)	TW(RW_WD_C_NC)	MW	Multivariate	MV_GEMMA	MA_8367646_2532	MA_8367646	T/C	0.038	2.0012e-07	0.0262417	0.0851804	0.0297246	0.193573	0.223298	TW ring width	0.237566	0.159964	0.04
136	Earlywood density	EWD	WCW	Univariate	BLINK	MA_12842_2389	MA_12842	T/A	0.109	1.05022e-15	1.37717e-10	11.471	198.3	426.022	624.322	EW density	4.09381	0.804825	0.09
137	Earlywood tangential tracheid width	ETTW	WCW	Univariate	BLINK	MA_12842_2389	MA_12842	T/A	0.109	2.20329e-07	0.0195859	-0.46981	0.478228	1.61552	2.09375	EW tangential tracheid width	2.04764	0.143399	0.09
138	Earlywood tangential tracheid width	ETTW	WCW	Univariate	BLINK	MA_12842_2476	MA_12842	C/G	0.147	1.10635e-06	0.0483588	-0.388114	0.478228	1.61552	2.09375	EW tangential tracheid width	1.80422	0.275194	0.13
139	Earlywood tangential tracheid width	ETTW	WCW	Univariate	BLINK	MA_12842_2490	MA_12842	C/G	0.109	2.98723e-07	0.0195859	-0.46088	0.478228	1.61552	2.09375	EW tangential tracheid width	1.97054	0.0971181	0.09
140	Annual ring wood ring width	RW	WCW	Univariate	BLINK	MA_12842_2476	MA_12842	C/G	0.147	1.63488e-06	0.0428768	-3.12053	30.0558	130.267	160.323	ARW ring width	1.52321	0.568291	0.13
141	Transition wood ring width	TRW	WCW	Univariate	BLINK	MA_12842_2476	MA_12842	C/G	0.147	3.04793e-07	0.0199839	-1.33133	6.34105	22.3387	28.6797	TW ring width	1.54986	0.0200907	0.13
142	Earlywood wall thickness	EWT	WCW	Univariate	BLINK	MA_10427326_2713	MA_10427326	G/A	0.085	6.1588e-08	0.00807609	0.0385688	0.00382544	0.0102699	0.0140953	EW wall thickness	1.6416	0.40366	0.09
143	Latewood number of cells	LNC	WCW	Univariate	BLINK	MA_10426292_14560	MA_10426292	G/A	0.051	2.55159e-07	0.0334593	0.925252	3.85896	12.6978	16.5568	LW number of cells	0.500508	0.718711	0.08
144	Annual ring wood number of cells	NC	WCW	Univariate	BLINK	MA_10425958_1555	MA_10425958	A/T	0.117	1.07172e-07	0.00468451	-2.88028	89.1775	412.426	501.603	ARW number of cells	0.341733	0.0416321	0.1
145	Annual ring wood number of cells	NC	WCW	Univariate	BLINK	MA_10434168_1291	MA_10434168	T/C	0.081	2.04527e-06	0.038314	-1.89216	89.1775	412.426	501.603	ARW number of cells	0.106264	0.592067	0.09
146	Annual ring wood number of cells	NC	WCW	Univariate	BLINK	MA_128658_8024	MA_128658	A/T	0.487	3.23493e-08	0.002121	0.681859	89.1775	412.426	501.603	ARW number of cells	0.0463133	0.894378	0.49
147	Annual ring wood number of cells	NC	WCW	Univariate	BLINK	MA_141147_11247	MA_141147	T/C	0.059	6.25949e-07	0.0164163	-0.929423	89.1775	412.426	501.603	ARW number of cells	0.0191222	0.45439	0.06
148	Annual ring wood number of cells	NC	WCW	Univariate	BLINK	MA_15508_8004	MA_15508	T/C	0.091	1.53649e-06	0.0335802	-0.956164	89.1775	412.426	501.603	ARW number of cells	0.0301536	0.0954363	0.09
149	Annual ring wood number of cells	NC	WCW	Univariate	BLINK	MA_20483_16380	MA_20483	C/T	0.045	1.20041e-09	0.000157411	3.01887	89.1775	412.426	501.603	ARW number of cells	0.156162	0.646061	0.05
150	Annual ring wood ring width	RW	WCW	Univariate	BLINK	MA_20483_16380	MA_20483	C/T	0.045	1.53771e-08	0.00201642	5.5629	30.0558	130.267	160.323	ARW ring width	1.65902	0.516533	0.05
151	Annual ring wood number of cells	NC	WCW	Univariate	BLINK	MA_34433_11887	MA_34433	T/C	0.336	3.2397e-07	0.0106206	-0.428948	89.1775	412.426	501.603	ARW number of cells	0.0163677	0.410487	0.33
152	Annual ring wood modulus of elasticity	MOE	WCW	Univariate	BLINK	MA_9349488_789	MA_9349488	C/T	0.071	1.54144e-08	0.0020213	0.735074	0.834718	3.49711	4.33183	ARW modulus of elasticity	1.64549	0.680037	0.06
153	Earlywood percentage	EP	WCW	Univariate	BLINK	MA_100689_23097	MA_100689	C/T	0.159	1.955e-07	0.0128181	1.44316	6.41988	25.8135	32.2334	EW percentage	1.72802	0.972379	0.15
154	Earlywood percentage	EP	WCW	Univariate	BLINK	MA_289646_3528	MA_289646	G/A	0.089	5.52453e-07	0.0241479	1.68361	6.41988	25.8135	32.2334	EW percentage	1.42599	0.336379	0.08
155	Earlywood percentage	EP	WCW	Univariate	BLINK	MA_5468_9193	MA_5468	G/T	0.061	1.40845e-10	1.84691e-05	-2.58452	6.41988	25.8135	32.2334	EW percentage	2.37399	0.146161	0.06
156	Transition wood percentage	TC	WCW	Univariate	BLINK	MA_5468_9193	MA_5468	G/T	0.061	1.3526e-07	0.0177368	1.98811	4.8064	19.0048	23.8112	TW percentage	1.90163	0.249475	0.06
157	Transition wood number of cells	TNC	WCW	Univariate	BLINK	MA_10428274_929	MA_10428274	G/A	0.089	1.37653e-07	0.0180506	-1.25582	32.3015	118.048	150.35	TW number of cells	0.170094	0.115255	0.1
158	Transition wood coarseness	TC	WCW	Univariate	BLINK	MA_10433057_20501	MA_10433057	T/A	0.257	1.44323e-06	0.0473131	6.7503	203.895	959.309	1163.2	TW coarseness	1.49604	0.274739	0.25
159	Transition wood coarseness	TC	WCW	Univariate	BLINK	MA_10436600_2140	MA_10436600	A/G	0.036	1.06422e-08	0.00139553	-16.7681	203.895	959.309	1163.2	TW coarseness	1.67772	0.382098	0.03
160	Transition wood coarseness	TC	WCW	Univariate	BLINK	MA_200163_3461	MA_200163	T/G	0.076	8.57543e-07	0.0374835	11.5916	203.895	959.309	1163.2	TW coarseness	1.62236	0.487271	0.07
161	Transition wood coarseness	TC	WCW	Univariate	BLINK	MA_27406_11793	MA_27406	A/G	0.144	3.59338e-07	0.0235602	-8.68297	203.895	959.309	1163.2	TW coarseness	1.59789	0.594073	0.13
162	Annual ring wood ring width	RW	WCW	Univariate	BLINK	MA_464588_5453	MA_464588	G/T	0.109	5.76664e-08	0.00378092	-3.47846	30.0558	130.267	160.323	ARW ring width	1.46593	0.0149344	0.08
163	Annual ring wood ring width	RW	WCW	Univariate	BLINK	MA_64117_9434	MA_64117	A/G	0.105	3.42456e-07	0.0112267	-3.31129	30.0558	130.267	160.323	ARW ring width	1.28541	0.576806	0.09
164	Annual ring wood ring width	RW	WCW	Univariate	BLINK	MA_9035900_2277	MA_9035900	A/G	0.254	1.4418e-07	0.00630217	2.64031	30.0558	130.267	160.323	ARW ring width	1.64785	0.827427	0.25
165	Transition wood ring width	TRW	WCW	Univariate	BLINK	MA_42658_7332	MA_42658	C/T	0.03	1.45276e-07	0.0190502	2.68151	6.34105	22.3387	28.6797	TW ring width	1.45917	0.0987779	0.02
166	Earlywood density	EWD	WCW	Univariate	UV_GEMMA	MA_12842_2389	MA_12842	T/A	0.109	2.84447e-13	2.74809e-08	11.471	198.3	426.022	624.322	EW density	4.09381	0.804825	0.09
167	Earlywood density	EWD	WCW	Univariate	UV_GEMMA	MA_12842_2476	MA_12842	C/G	0.147	2.54695e-11	1.11327e-06	9.23824	198.3	426.022	624.322	EW density	3.4282	0.044231	0.13
168	Earlywood density	EWD	WCW	Univariate	UV_GEMMA	MA_12842_2490	MA_12842	C/G	0.109	4.19139e-13	2.74809e-08	11.2954	198.3	426.022	624.322	EW density	3.96946	0.0387903	0.09
169	Earlywood tangential tracheid width	ETTW	WCW	Univariate	UV_GEMMA	MA_12842_2389	MA_12842	T/A	0.109	2.59832e-07	0.0228324	-0.46981	0.478228	1.61552	2.09375	EW tangential tracheid width	2.04764	0.143399	0.09
170	Earlywood tangential tracheid width	ETTW	WCW	Univariate	UV_GEMMA	MA_12842_2490	MA_12842	C/G	0.109	3.48241e-07	0.0228324	-0.46088	0.478228	1.61552	2.09375	EW tangential tracheid width	1.97054	0.0971181	0.09
171	Earlywood percentage	EP	WCW	Univariate	UV_GEMMA	MA_5468_9193	MA_5468	G/T	0.061	5.38508e-08	0.00706145	-2.58452	6.41988	25.8135	32.2334	EW percentage	2.37399	0.146161	0.06
172	Annual ring wood coarseness	C	WCW	Univariate	UV_GEMMA	MA_200163_3461	MA_200163	T/G	0.076	1.44097e-06	0.0472386	10.103	150.213	652.309	802.522	ARW coarseness	1.78631	0.915514	0.07
173	Annual ring wood coarseness	C	WCW	Univariate	UV_GEMMA	MA_27406_11793	MA_27406	A/G	0.144	5.70484e-07	0.0249359	-7.82768	150.213	652.309	802.522	ARW coarseness	1.88224	0.955317	0.13
174	Annual ring wood coarseness	C	WCW	Univariate	UV_GEMMA	MA_27406_11794	MA_27406	G/A	0.144	5.43296e-07	0.0249359	-7.83564	150.213	652.309	802.522	ARW coarseness	1.88607	0.144503	0.13
175	Annual ring wood coarseness	C	WCW	Univariate	UV_GEMMA	MA_27406_11827	MA_27406	G/T	0.145	3.8758e-07	0.0249359	-7.8155	150.213	652.309	802.522	ARW coarseness	1.88721	0.999371	0.13
176	Annual ring wood wall thickness	WT	WCW	Univariate	UV_GEMMA	MA_27406_11793	MA_27406	A/G	0.144	7.86187e-07	0.0343642	-0.0468697	0.00850503	0.0208864	0.0293914	ARW wall thickness	1.84259	0.29485	0.13
177	Annual ring wood wall thickness	WT	WCW	Univariate	UV_GEMMA	MA_27406_11794	MA_27406	G/A	0.144	6.14768e-07	0.0343642	-0.0472611	0.00850503	0.0208864	0.0293914	ARW wall thickness	1.8735	0.302026	0.13
178	Annual ring wood wall thickness	WT	WCW	Univariate	UV_GEMMA	MA_27406_11827	MA_27406	G/T	0.145	6.30876e-07	0.0343642	-0.0464984	0.00850503	0.0208864	0.0293914	ARW wall thickness	1.82398	0.531068	0.13
179	Earlywood density	EWD	WCW	Univariate	UV_GEMMA	MA_10117117_4107	MA_10117117	T/C	0.341	3.76959e-07	0.00560919	-5.22662	198.3	426.022	624.322	EW density	1.96654	0.763521	0.34
180	Earlywood density	EWD	WCW	Univariate	UV_GEMMA	MA_106297_6413	MA_106297	A/G	0.356	3.84982e-07	0.00560919	5.17249	198.3	426.022	624.322	EW density	1.96497	0.0688237	0.34
181	Earlywood density	EWD	WCW	Univariate	UV_GEMMA	MA_106297_6469	MA_106297	T/C	0.355	2.26746e-07	0.00424761	5.26444	198.3	426.022	624.322	EW density	2.03289	0.0356028	0.34
182	Earlywood density	EWD	WCW	Univariate	UV_GEMMA	MA_29357_4423	MA_29357	T/C	0.187	9.95011e-08	0.00313176	6.74943	198.3	426.022	624.322	EW density	2.21864	0.0983679	0.17
183	Earlywood density	EWD	WCW	Univariate	UV_GEMMA	MA_63888_14494	MA_63888	A/C	0.137	1.19415e-07	0.00313176	7.63008	198.3	426.022	624.322	EW density	2.20501	0.204315	0.13
184	Earlywood density	EWD	WCW	Univariate	UV_GEMMA	MA_63888_14499	MA_63888	G/C	0.136	2.22318e-07	0.00424761	7.47807	198.3	426.022	624.322	EW density	2.105	0.276281	0.13
185	Earlywood percentage	EP	WCW	Univariate	UV_GEMMA	MA_10428431_1990	MA_10428431	C/A	0.155	7.15357e-07	0.0469024	-1.55715	6.41988	25.8135	32.2334	EW percentage	1.97048	0.293302	0.16
186	Earlywood (Coarseness, wood density, radial tracheid width, tangential tracheid width)	EW(C_WD_RTW_TTW)	WCW	Multivariate	MV_GEMMA	MA_12842_2389	MA_12842	T/A	0.109	2.80997e-12	3.26604e-07	0.371412	91.2858	512.745	604.031	EW coarseness	0.00443596	0.937576	0.09
187	Earlywood (Coarseness, wood density, radial tracheid width, tangential tracheid width)	EW(C_WD_RTW_TTW)	WCW	Multivariate	MV_GEMMA	MA_12842_2389	MA_12842	T/A	0.109	2.80997e-12	3.26604e-07	11.5012	191.848	432.171	624.019	EW density	4.11738	0.804825	0.09
188	Earlywood (Coarseness, wood density, radial tracheid width, tangential tracheid width)	EW(C_WD_RTW_TTW)	WCW	Multivariate	MV_GEMMA	MA_12842_2389	MA_12842	T/A	0.109	2.80997e-12	3.26604e-07	-0.606207	0.277489	3.45233	3.72982	EW radial tracheid width	1.91377	0.372566	0.09
189	Earlywood (Coarseness, wood density, radial tracheid width, tangential tracheid width)	EW(C_WD_RTW_TTW)	WCW	Multivariate	MV_GEMMA	MA_12842_2389	MA_12842	T/A	0.109	2.80997e-12	3.26604e-07	-0.473502	0.47358	1.61955	2.09313	EW tangential tracheid width	2.08057	0.143399	0.09
190	Earlywood (Coarseness, wood density, radial tracheid width, tangential tracheid width)	EW(C_WD_RTW_TTW)	WCW	Multivariate	MV_GEMMA	MA_12842_2476	MA_12842	C/G	0.147	2.42535e-10	1.06012e-05	0.0887899	91.2858	512.745	604.031	EW coarseness	0.000327314	0.974374	0.13
191	Earlywood (Coarseness, wood density, radial tracheid width, tangential tracheid width)	EW(C_WD_RTW_TTW)	WCW	Multivariate	MV_GEMMA	MA_12842_2476	MA_12842	C/G	0.147	2.42535e-10	1.06012e-05	9.29098	191.848	432.171	624.019	EW density	3.46914	0.044231	0.13
192	Earlywood (Coarseness, wood density, radial tracheid width, tangential tracheid width)	EW(C_WD_RTW_TTW)	WCW	Multivariate	MV_GEMMA	MA_12842_2476	MA_12842	C/G	0.147	2.42535e-10	1.06012e-05	-0.490839	0.277489	3.45233	3.72982	EW radial tracheid width	1.6199	0.241574	0.13
193	Earlywood (Coarseness, wood density, radial tracheid width, tangential tracheid width)	EW(C_WD_RTW_TTW)	WCW	Multivariate	MV_GEMMA	MA_12842_2476	MA_12842	C/G	0.147	2.42535e-10	1.06012e-05	-0.391828	0.47358	1.61955	2.09313	EW tangential tracheid width	1.83947	0.275194	0.13
194	Earlywood (Coarseness, wood density, radial tracheid width, tangential tracheid width)	EW(C_WD_RTW_TTW)	WCW	Multivariate	MV_GEMMA	MA_12842_2490	MA_12842	C/G	0.109	4.98138e-12	3.26604e-07	0.35788	91.2858	512.745	604.031	EW coarseness	0.00411861	0.904094	0.09
195	Earlywood (Coarseness, wood density, radial tracheid width, tangential tracheid width)	EW(C_WD_RTW_TTW)	WCW	Multivariate	MV_GEMMA	MA_12842_2490	MA_12842	C/G	0.109	4.98138e-12	3.26604e-07	11.3256	191.848	432.171	624.019	EW density	3.99266	0.0387903	0.09
196	Earlywood (Coarseness, wood density, radial tracheid width, tangential tracheid width)	EW(C_WD_RTW_TTW)	WCW	Multivariate	MV_GEMMA	MA_12842_2490	MA_12842	C/G	0.109	4.98138e-12	3.26604e-07	-0.598895	0.277489	3.45233	3.72982	EW radial tracheid width	1.86788	0.341263	0.09
197	Earlywood (Coarseness, wood density, radial tracheid width, tangential tracheid width)	EW(C_WD_RTW_TTW)	WCW	Multivariate	MV_GEMMA	MA_12842_2490	MA_12842	C/G	0.109	4.98138e-12	3.26604e-07	-0.464616	0.47358	1.61955	2.09313	EW tangential tracheid width	2.00321	0.0971181	0.09
198	Number of cells (Annual ring wood, earlywood, transition wood, latewood)	NC(ARW_EW_TW_LW)	WCW	Multivariate	MV_GEMMA	MA_12842_2389	MA_12842	T/A	0.109	4.32049e-09	0.000566545	-5.4238	25.8357	421.367	447.203	ARW number of cells	1.27772	0.207748	0.09
199	Number of cells (Annual ring wood, earlywood, transition wood, latewood)	NC(ARW_EW_TW_LW)	WCW	Multivariate	MV_GEMMA	MA_12842_2389	MA_12842	T/A	0.109	4.32049e-09	0.000566545	-2.67534	20.4958	222.717	243.213	EW number of cells	0.571617	0.302318	0.09
200	Number of cells (Annual ring wood, earlywood, transition wood, latewood)	NC(ARW_EW_TW_LW)	WCW	Multivariate	MV_GEMMA	MA_12842_2389	MA_12842	T/A	0.109	4.32049e-09	0.000566545	-0.122099	2.68258	12.3092	14.9918	LW number of cells	0.0193156	0.985445	0.09
201	Number of cells (Annual ring wood, earlywood, transition wood, latewood)	NC(ARW_EW_TW_LW)	WCW	Multivariate	MV_GEMMA	MA_12842_2389	MA_12842	T/A	0.109	4.32049e-09	0.000566545	-1.60769	12.8019	113.984	126.786	TW number of cells	0.395977	0.958962	0.09
202	Number of cells (Annual ring wood, earlywood, transition wood, latewood)	NC(ARW_EW_TW_LW)	WCW	Multivariate	MV_GEMMA	MA_12842_2476	MA_12842	C/G	0.148	2.26655e-06	0.042459	-4.4106	25.8357	421.367	447.203	ARW number of cells	1.09704	0.443071	0.13
203	Number of cells (Annual ring wood, earlywood, transition wood, latewood)	NC(ARW_EW_TW_LW)	WCW	Multivariate	MV_GEMMA	MA_12842_2476	MA_12842	C/G	0.148	2.26655e-06	0.042459	-2.40016	20.4958	222.717	243.213	EW number of cells	0.597346	0.586702	0.13
204	Number of cells (Annual ring wood, earlywood, transition wood, latewood)	NC(ARW_EW_TW_LW)	WCW	Multivariate	MV_GEMMA	MA_12842_2476	MA_12842	C/G	0.148	2.26655e-06	0.042459	-0.0943889	2.68258	12.3092	14.9918	LW number of cells	0.0149872	0.556191	0.13
205	Number of cells (Annual ring wood, earlywood, transition wood, latewood)	NC(ARW_EW_TW_LW)	WCW	Multivariate	MV_GEMMA	MA_12842_2476	MA_12842	C/G	0.148	2.26655e-06	0.042459	-1.2533	12.8019	113.984	126.786	TW number of cells	0.312443	0.97289	0.13
206	Number of cells (Annual ring wood, earlywood, transition wood, latewood)	NC(ARW_EW_TW_LW)	WCW	Multivariate	MV_GEMMA	MA_12842_2490	MA_12842	C/G	0.11	1.12058e-08	0.00073471	-5.13225	25.8357	421.367	447.203	ARW number of cells	1.15325	0.456664	0.09
207	Number of cells (Annual ring wood, earlywood, transition wood, latewood)	NC(ARW_EW_TW_LW)	WCW	Multivariate	MV_GEMMA	MA_12842_2490	MA_12842	C/G	0.11	1.12058e-08	0.00073471	-2.50769	20.4958	222.717	243.213	EW number of cells	0.50626	0.57446	0.09
208	Number of cells (Annual ring wood, earlywood, transition wood, latewood)	NC(ARW_EW_TW_LW)	WCW	Multivariate	MV_GEMMA	MA_12842_2490	MA_12842	C/G	0.11	1.12058e-08	0.00073471	-0.11315	2.68258	12.3092	14.9918	LW number of cells	0.0167212	0.832727	0.09
209	Number of cells (Annual ring wood, earlywood, transition wood, latewood)	NC(ARW_EW_TW_LW)	WCW	Multivariate	MV_GEMMA	MA_12842_2490	MA_12842	C/G	0.11	1.12058e-08	0.00073471	-1.49483	12.8019	113.984	126.786	TW number of cells	0.345085	0.753904	0.09
210	Wood density (Annual ring wood, earlywood, transition wood, latewood)	WD(ARW_EW_TW_LW)	WCW	Multivariate	MV_GEMMA	MA_12842_2389	MA_12842	T/A	0.109	3.92445e-14	3.8697e-09	10.5956	378.022	1032.07	1410.09	ARW density	1.54646	0.573408	0.09
211	Wood density (Annual ring wood, earlywood, transition wood, latewood)	WD(ARW_EW_TW_LW)	WCW	Multivariate	MV_GEMMA	MA_12842_2389	MA_12842	T/A	0.109	3.92445e-14	3.8697e-09	11.5512	163.293	459.533	622.826	EW density	4.16126	0.804825	0.09
212	Wood density (Annual ring wood, earlywood, transition wood, latewood)	WD(ARW_EW_TW_LW)	WCW	Multivariate	MV_GEMMA	MA_12842_2389	MA_12842	T/A	0.109	3.92445e-14	3.8697e-09	3.28112	922.494	1761.79	2684.28	LW density	0.0779021	0.395816	0.09
213	Wood density (Annual ring wood, earlywood, transition wood, latewood)	WD(ARW_EW_TW_LW)	WCW	Multivariate	MV_GEMMA	MA_12842_2389	MA_12842	T/A	0.109	3.92445e-14	3.8697e-09	6.92792	421.929	944.396	1366.32	TW density	0.682316	0.325683	0.09
214	Wood density (Annual ring wood, earlywood, transition wood, latewood)	WD(ARW_EW_TW_LW)	WCW	Multivariate	MV_GEMMA	MA_12842_2476	MA_12842	C/G	0.147	1.39106e-10	6.08031e-06	9.43346	378.022	1032.07	1410.09	ARW density	1.58267	0.516621	0.13
215	Wood density (Annual ring wood, earlywood, transition wood, latewood)	WD(ARW_EW_TW_LW)	WCW	Multivariate	MV_GEMMA	MA_12842_2476	MA_12842	C/G	0.147	1.39106e-10	6.08031e-06	9.27994	163.293	459.533	622.826	EW density	3.46753	0.044231	0.13
216	Wood density (Annual ring wood, earlywood, transition wood, latewood)	WD(ARW_EW_TW_LW)	WCW	Multivariate	MV_GEMMA	MA_12842_2476	MA_12842	C/G	0.147	1.39106e-10	6.08031e-06	3.78499	922.494	1761.79	2684.28	LW density	0.133843	0.94257	0.13
217	Wood density (Annual ring wood, earlywood, transition wood, latewood)	WD(ARW_EW_TW_LW)	WCW	Multivariate	MV_GEMMA	MA_12842_2476	MA_12842	C/G	0.147	1.39106e-10	6.08031e-06	6.95136	421.929	944.396	1366.32	TW density	0.886916	0.291049	0.13
218	Wood density (Annual ring wood, earlywood, transition wood, latewood)	WD(ARW_EW_TW_LW)	WCW	Multivariate	MV_GEMMA	MA_12842_2490	MA_12842	C/G	0.109	5.90208e-14	3.8697e-09	10.4337	378.022	1032.07	1410.09	ARW density	1.49957	0.434009	0.09
219	Wood density (Annual ring wood, earlywood, transition wood, latewood)	WD(ARW_EW_TW_LW)	WCW	Multivariate	MV_GEMMA	MA_12842_2490	MA_12842	C/G	0.109	5.90208e-14	3.8697e-09	11.3834	163.293	459.533	622.826	EW density	4.04118	0.0387903	0.09
220	Wood density (Annual ring wood, earlywood, transition wood, latewood)	WD(ARW_EW_TW_LW)	WCW	Multivariate	MV_GEMMA	MA_12842_2490	MA_12842	C/G	0.109	5.90208e-14	3.8697e-09	3.30612	922.494	1761.79	2684.28	LW density	0.0790938	0.501414	0.09
221	Wood density (Annual ring wood, earlywood, transition wood, latewood)	WD(ARW_EW_TW_LW)	WCW	Multivariate	MV_GEMMA	MA_12842_2490	MA_12842	C/G	0.109	5.90208e-14	3.8697e-09	6.88813	421.929	944.396	1366.32	TW density	0.674501	0.463216	0.09
222	Annual ring wood (Coarseness, wood density, radial tracheid width, tangential tracheid width)	ARW(C_WD_RTW_TTW)	WCW	Multivariate	MV_GEMMA	MA_12842_2389	MA_12842	T/A	0.109	6.2612e-09	0.0006823	-1.78102	117.873	684.118	801.991	ARW coarseness	0.0768249	0.539548	0.09
223	Annual ring wood (Coarseness, wood density, radial tracheid width, tangential tracheid width)	ARW(C_WD_RTW_TTW)	WCW	Multivariate	MV_GEMMA	MA_12842_2389	MA_12842	T/A	0.109	6.2612e-09	0.0006823	10.4457	511.116	905.506	1416.62	ARW density	1.49608	0.573408	0.09
224	Annual ring wood (Coarseness, wood density, radial tracheid width, tangential tracheid width)	ARW(C_WD_RTW_TTW)	WCW	Multivariate	MV_GEMMA	MA_12842_2389	MA_12842	T/A	0.109	6.2612e-09	0.0006823	-0.568461	0.156915	3.45736	3.61428	ARW radial tracheid width	1.73666	0.336307	0.09
225	Annual ring wood (Coarseness, wood density, radial tracheid width, tangential tracheid width)	ARW(C_WD_RTW_TTW)	WCW	Multivariate	MV_GEMMA	MA_12842_2389	MA_12842	T/A	0.109	6.2612e-09	0.0006823	-0.394573	0.414937	1.48685	1.90179	ARW tangential tracheid width	1.59011	0.211326	0.09
226	Annual ring wood (Coarseness, wood density, radial tracheid width, tangential tracheid width)	ARW(C_WD_RTW_TTW)	WCW	Multivariate	MV_GEMMA	MA_12842_2476	MA_12842	C/G	0.147	2.78366e-07	0.0121674	-1.2858	117.873	684.118	801.991	ARW coarseness	0.0516978	0.863552	0.13
227	Annual ring wood (Coarseness, wood density, radial tracheid width, tangential tracheid width)	ARW(C_WD_RTW_TTW)	WCW	Multivariate	MV_GEMMA	MA_12842_2476	MA_12842	C/G	0.147	2.78366e-07	0.0121674	9.3985	511.116	905.506	1416.62	ARW density	1.56372	0.516621	0.13
228	Annual ring wood (Coarseness, wood density, radial tracheid width, tangential tracheid width)	ARW(C_WD_RTW_TTW)	WCW	Multivariate	MV_GEMMA	MA_12842_2476	MA_12842	C/G	0.147	2.78366e-07	0.0121674	-0.480019	0.156915	3.45736	3.61428	ARW radial tracheid width	1.59879	0.162972	0.13
229	Annual ring wood (Coarseness, wood density, radial tracheid width, tangential tracheid width)	ARW(C_WD_RTW_TTW)	WCW	Multivariate	MV_GEMMA	MA_12842_2476	MA_12842	C/G	0.147	2.78366e-07	0.0121674	-0.329889	0.414937	1.48685	1.90179	ARW tangential tracheid width	1.43506	0.150081	0.13
230	Annual ring wood (Coarseness, wood density, radial tracheid width, tangential tracheid width)	ARW(C_WD_RTW_TTW)	WCW	Multivariate	MV_GEMMA	MA_12842_2490	MA_12842	C/G	0.109	1.04065e-08	0.0006823	-1.78078	117.873	684.118	801.991	ARW coarseness	0.0768045	0.57077	0.09
231	Annual ring wood (Coarseness, wood density, radial tracheid width, tangential tracheid width)	ARW(C_WD_RTW_TTW)	WCW	Multivariate	MV_GEMMA	MA_12842_2490	MA_12842	C/G	0.109	1.04065e-08	0.0006823	10.2746	511.116	905.506	1416.62	ARW density	1.44746	0.434009	0.09
232	Annual ring wood (Coarseness, wood density, radial tracheid width, tangential tracheid width)	ARW(C_WD_RTW_TTW)	WCW	Multivariate	MV_GEMMA	MA_12842_2490	MA_12842	C/G	0.109	1.04065e-08	0.0006823	-0.560688	0.156915	3.45736	3.61428	ARW radial tracheid width	1.68949	0.29791	0.09
233	Annual ring wood (Coarseness, wood density, radial tracheid width, tangential tracheid width)	ARW(C_WD_RTW_TTW)	WCW	Multivariate	MV_GEMMA	MA_12842_2490	MA_12842	C/G	0.109	1.04065e-08	0.0006823	-0.387702	0.414937	1.48685	1.90179	ARW tangential tracheid width	1.53521	0.375221	0.09
234	Tangential tracheid width (Annual ring wood, earlywood, transition wood, latewood)	TTW(ARW_EW_TW_LW)	WCW	Multivariate	MV_GEMMA	MA_12842_2389	MA_12842	T/A	0.109	1.71319e-07	0.0185282	-0.384587	0.486869	1.41628	1.90315	ARW tangential tracheid width	1.50956	0.211326	0.09
235	Tangential tracheid width (Annual ring wood, earlywood, transition wood, latewood)	TTW(ARW_EW_TW_LW)	WCW	Multivariate	MV_GEMMA	MA_12842_2389	MA_12842	T/A	0.109	1.71319e-07	0.0185282	-0.467013	0.526726	1.5669	2.09363	EW tangential tracheid width	2.02345	0.143399	0.09
236	Tangential tracheid width (Annual ring wood, earlywood, transition wood, latewood)	TTW(ARW_EW_TW_LW)	WCW	Multivariate	MV_GEMMA	MA_12842_2389	MA_12842	T/A	0.109	1.71319e-07	0.0185282	-0.171701	0.361663	1.26022	1.62188	LW tangential tracheid width	0.353071	0.078896	0.09
237	Tangential tracheid width (Annual ring wood, earlywood, transition wood, latewood)	TTW(ARW_EW_TW_LW)	WCW	Multivariate	MV_GEMMA	MA_12842_2389	MA_12842	T/A	0.109	1.71319e-07	0.0185282	-0.315027	0.387127	1.52004	1.90717	TW tangential tracheid width	1.01075	0.30547	0.09
238	Tangential tracheid width (Annual ring wood, earlywood, transition wood, latewood)	TTW(ARW_EW_TW_LW)	WCW	Multivariate	MV_GEMMA	MA_12842_2490	MA_12842	C/G	0.109	2.82593e-07	0.0185282	-0.377867	0.486869	1.41628	1.90315	ARW tangential tracheid width	1.45727	0.375221	0.09
239	Tangential tracheid width (Annual ring wood, earlywood, transition wood, latewood)	TTW(ARW_EW_TW_LW)	WCW	Multivariate	MV_GEMMA	MA_12842_2490	MA_12842	C/G	0.109	2.82593e-07	0.0185282	-0.458235	0.526726	1.5669	2.09363	EW tangential tracheid width	1.9481	0.0971181	0.09
240	Tangential tracheid width (Annual ring wood, earlywood, transition wood, latewood)	TTW(ARW_EW_TW_LW)	WCW	Multivariate	MV_GEMMA	MA_12842_2490	MA_12842	C/G	0.109	2.82593e-07	0.0185282	-0.177562	0.361663	1.26022	1.62188	LW tangential tracheid width	0.377586	0.984401	0.09
241	Tangential tracheid width (Annual ring wood, earlywood, transition wood, latewood)	TTW(ARW_EW_TW_LW)	WCW	Multivariate	MV_GEMMA	MA_12842_2490	MA_12842	C/G	0.109	2.82593e-07	0.0185282	-0.309228	0.387127	1.52004	1.90717	TW tangential tracheid width	0.973872	0.511478	0.09
242	Wall thickness (Annual ring wood, earlywood, transition wood, latewood)	WT(ARW_EW_TW_LW)	WCW	Multivariate	MV_GEMMA	MA_12842_2389	MA_12842	T/A	0.109	4.44375e-08	0.0056237	0.0255104	0.0073803	0.0219637	0.029344	ARW wall thickness	0.430773	0.840326	0.09
243	Wall thickness (Annual ring wood, earlywood, transition wood, latewood)	WT(ARW_EW_TW_LW)	WCW	Multivariate	MV_GEMMA	MA_12842_2389	MA_12842	T/A	0.109	4.44375e-08	0.0056237	0.0347101	0.00365029	0.0104376	0.0140879	EW wall thickness	1.66112	0.232583	0.09
244	Wall thickness (Annual ring wood, earlywood, transition wood, latewood)	WT(ARW_EW_TW_LW)	WCW	Multivariate	MV_GEMMA	MA_12842_2389	MA_12842	T/A	0.109	4.44375e-08	0.0056237	-0.00580997	0.0375251	0.0682721	0.105797	LW wall thickness	0.00619736	0.412277	0.09
245	Wall thickness (Annual ring wood, earlywood, transition wood, latewood)	WT(ARW_EW_TW_LW)	WCW	Multivariate	MV_GEMMA	MA_12842_2389	MA_12842	T/A	0.109	4.44375e-08	0.0056237	0.00331234	0.00932251	0.024346	0.0336685	TW wall thickness	0.00632964	0.828883	0.09
246	Wall thickness (Annual ring wood, earlywood, transition wood, latewood)	WT(ARW_EW_TW_LW)	WCW	Multivariate	MV_GEMMA	MA_12842_2490	MA_12842	C/G	0.109	8.57729e-08	0.0056237	0.0249364	0.0073803	0.0219637	0.029344	ARW wall thickness	0.411608	0.896356	0.09
247	Wall thickness (Annual ring wood, earlywood, transition wood, latewood)	WT(ARW_EW_TW_LW)	WCW	Multivariate	MV_GEMMA	MA_12842_2490	MA_12842	C/G	0.109	8.57729e-08	0.0056237	0.0339772	0.00365029	0.0104376	0.0140879	EW wall thickness	1.59171	0.262456	0.09
248	Wall thickness (Annual ring wood, earlywood, transition wood, latewood)	WT(ARW_EW_TW_LW)	WCW	Multivariate	MV_GEMMA	MA_12842_2490	MA_12842	C/G	0.109	8.57729e-08	0.0056237	-0.00616645	0.0375251	0.0682721	0.105797	LW wall thickness	0.0069812	0.571453	0.09
249	Wall thickness (Annual ring wood, earlywood, transition wood, latewood)	WT(ARW_EW_TW_LW)	WCW	Multivariate	MV_GEMMA	MA_12842_2490	MA_12842	C/G	0.109	8.57729e-08	0.0056237	0.00360323	0.00932251	0.024346	0.0336685	TW wall thickness	0.0074902	0.840485	0.09
250	Earlywood (Ring width, wood density, coarseness, number of cells)	EW(RW_WD_C_NC)	WCW	Multivariate	MV_GEMMA	MA_12842_2389	MA_12842	T/A	0.109	3.68064e-12	3.45201e-07	0.522742	91.3801	511.064	602.444	EW coarseness	0.00881033	0.937576	0.09
251	Earlywood (Ring width, wood density, coarseness, number of cells)	EW(RW_WD_C_NC)	WCW	Multivariate	MV_GEMMA	MA_12842_2389	MA_12842	T/A	0.109	3.68064e-12	3.45201e-07	11.4494	197.452	426.802	624.254	EW density	4.07887	0.804825	0.09
252	Earlywood (Ring width, wood density, coarseness, number of cells)	EW(RW_WD_C_NC)	WCW	Multivariate	MV_GEMMA	MA_12842_2389	MA_12842	T/A	0.109	3.68064e-12	3.45201e-07	-2.74842	32.6416	226.231	258.873	EW number of cells	0.56678	0.302318	0.09
253	Earlywood (Ring width, wood density, coarseness, number of cells)	EW(RW_WD_C_NC)	WCW	Multivariate	MV_GEMMA	MA_12842_2389	MA_12842	T/A	0.109	3.68064e-12	3.45201e-07	-1.92047	8.26653	55.4405	63.707	EW ring width	1.12451	0.0574109	0.09
254	Earlywood (Ring width, wood density, coarseness, number of cells)	EW(RW_WD_C_NC)	WCW	Multivariate	MV_GEMMA	MA_12842_2476	MA_12842	C/G	0.147	4.59444e-10	2.00823e-05	0.119703	91.3801	511.064	602.444	EW coarseness	0.000596466	0.974374	0.13
255	Earlywood (Ring width, wood density, coarseness, number of cells)	EW(RW_WD_C_NC)	WCW	Multivariate	MV_GEMMA	MA_12842_2476	MA_12842	C/G	0.147	4.59444e-10	2.00823e-05	9.19844	197.452	426.802	624.254	EW density	3.39909	0.044231	0.13
256	Earlywood (Ring width, wood density, coarseness, number of cells)	EW(RW_WD_C_NC)	WCW	Multivariate	MV_GEMMA	MA_12842_2476	MA_12842	C/G	0.147	4.59444e-10	2.00823e-05	-2.47984	32.6416	226.231	258.873	EW number of cells	0.595742	0.586702	0.13
257	Earlywood (Ring width, wood density, coarseness, number of cells)	EW(RW_WD_C_NC)	WCW	Multivariate	MV_GEMMA	MA_12842_2476	MA_12842	C/G	0.147	4.59444e-10	2.00823e-05	-1.72334	8.26653	55.4405	63.707	EW ring width	1.16909	0.00971746	0.13
258	Earlywood (Ring width, wood density, coarseness, number of cells)	EW(RW_WD_C_NC)	WCW	Multivariate	MV_GEMMA	MA_12842_2490	MA_12842	C/G	0.109	5.26501e-12	3.45201e-07	0.499553	91.3801	511.064	602.444	EW coarseness	0.00804599	0.904094	0.09
259	Earlywood (Ring width, wood density, coarseness, number of cells)	EW(RW_WD_C_NC)	WCW	Multivariate	MV_GEMMA	MA_12842_2490	MA_12842	C/G	0.109	5.26501e-12	3.45201e-07	11.272	197.452	426.802	624.254	EW density	3.95347	0.0387903	0.09
260	Earlywood (Ring width, wood density, coarseness, number of cells)	EW(RW_WD_C_NC)	WCW	Multivariate	MV_GEMMA	MA_12842_2490	MA_12842	C/G	0.109	5.26501e-12	3.45201e-07	-2.58356	32.6416	226.231	258.873	EW number of cells	0.500826	0.57446	0.09
261	Earlywood (Ring width, wood density, coarseness, number of cells)	EW(RW_WD_C_NC)	WCW	Multivariate	MV_GEMMA	MA_12842_2490	MA_12842	C/G	0.109	5.26501e-12	3.45201e-07	-1.86896	8.26653	55.4405	63.707	EW ring width	1.06499	0.07113	0.09
262	Transition wood (Number of cells, ring width, radial tracheid width)	TW(NC_RW_RTW)	WCW	Multivariate	MV_GEMMA	MA_12842_2389	MA_12842	T/A	0.109	7.65624e-07	0.0448628	-1.6379	29.0867	121.155	150.242	TW number of cells	0.346829	0.958962	0.09
263	Transition wood (Number of cells, ring width, radial tracheid width)	TW(NC_RW_RTW)	WCW	Multivariate	MV_GEMMA	MA_12842_2389	MA_12842	T/A	0.109	7.65624e-07	0.0448628	-0.520807	0.390753	3.10633	3.49708	TW radial tracheid width	1.50655	0.1351	0.09
264	Transition wood (Number of cells, ring width, radial tracheid width)	TW(NC_RW_RTW)	WCW	Multivariate	MV_GEMMA	MA_12842_2389	MA_12842	T/A	0.109	7.65624e-07	0.0448628	-1.57753	6.33856	22.4402	28.7788	TW ring width	1.67965	0.0200143	0.09
265	Transition wood (Number of cells, ring width, radial tracheid width)	TW(NC_RW_RTW)	WCW	Multivariate	MV_GEMMA	MA_12842_2476	MA_12842	C/G	0.148	1.02637e-06	0.0448628	-1.26887	29.0867	121.155	150.242	TW number of cells	0.270255	0.97289	0.13
266	Transition wood (Number of cells, ring width, radial tracheid width)	TW(NC_RW_RTW)	WCW	Multivariate	MV_GEMMA	MA_12842_2476	MA_12842	C/G	0.148	1.02637e-06	0.0448628	-0.44685	0.390753	3.10633	3.49708	TW radial tracheid width	1.43995	0.168255	0.13
267	Transition wood (Number of cells, ring width, radial tracheid width)	TW(NC_RW_RTW)	WCW	Multivariate	MV_GEMMA	MA_12842_2476	MA_12842	C/G	0.148	1.02637e-06	0.0448628	-1.33713	6.33856	22.4402	28.7788	TW ring width	1.56677	0.0200907	0.13
268	Transition wood (Number of cells, ring width, radial tracheid width)	TW(NC_RW_RTW)	WCW	Multivariate	MV_GEMMA	MA_12842_2490	MA_12842	C/G	0.11	8.57036e-07	0.0448628	-1.52977	29.0867	121.155	150.242	TW number of cells	0.304981	0.753904	0.09
269	Transition wood (Number of cells, ring width, radial tracheid width)	TW(NC_RW_RTW)	WCW	Multivariate	MV_GEMMA	MA_12842_2490	MA_12842	C/G	0.11	8.57036e-07	0.0448628	-0.512888	0.390753	3.10633	3.49708	TW radial tracheid width	1.47283	0.0848969	0.09
270	Transition wood (Number of cells, ring width, radial tracheid width)	TW(NC_RW_RTW)	WCW	Multivariate	MV_GEMMA	MA_12842_2490	MA_12842	C/G	0.11	8.57036e-07	0.0448628	-1.53683	6.33856	22.4402	28.7788	TW ring width	1.60691	0.938132	0.09
271	Tangential tracheid width (Annual ring wood, earlywood, transition wood, latewood)	TTW(ARW_EW_TW_LW)	WCW	Multivariate	MV_GEMMA	MA_5468_9193	MA_5468	G/T	0.061	8.20501e-07	0.0358641	0.094408	0.486869	1.41628	1.90315	ARW tangential tracheid width	0.0536501	0.890342	0.06
272	Tangential tracheid width (Annual ring wood, earlywood, transition wood, latewood)	TTW(ARW_EW_TW_LW)	WCW	Multivariate	MV_GEMMA	MA_5468_9193	MA_5468	G/T	0.061	8.20501e-07	0.0358641	0.130582	0.526726	1.5669	2.09363	EW tangential tracheid width	0.0933027	0.765192	0.06
273	Tangential tracheid width (Annual ring wood, earlywood, transition wood, latewood)	TTW(ARW_EW_TW_LW)	WCW	Multivariate	MV_GEMMA	MA_5468_9193	MA_5468	G/T	0.061	8.20501e-07	0.0358641	0.164607	0.361663	1.26022	1.62188	LW tangential tracheid width	0.191382	0.852707	0.06
274	Tangential tracheid width (Annual ring wood, earlywood, transition wood, latewood)	TTW(ARW_EW_TW_LW)	WCW	Multivariate	MV_GEMMA	MA_5468_9193	MA_5468	G/T	0.061	8.20501e-07	0.0358641	0.137037	0.387127	1.52004	1.90717	TW tangential tracheid width	0.1128	0.977937	0.06
275	Wood density (Annual ring wood, earlywood, transition wood, latewood)	WD(ARW_EW_TW_LW)	WCW	Multivariate	MV_GEMMA	MA_106297_6413	MA_106297	A/G	0.356	1.42593e-06	0.0233727	4.74309	378.022	1032.07	1410.09	ARW density	0.731545	0.145112	0.34
276	Wood density (Annual ring wood, earlywood, transition wood, latewood)	WD(ARW_EW_TW_LW)	WCW	Multivariate	MV_GEMMA	MA_106297_6413	MA_106297	A/G	0.356	1.42593e-06	0.0233727	5.23804	163.293	459.533	622.826	EW density	2.01993	0.0688237	0.34
277	Wood density (Annual ring wood, earlywood, transition wood, latewood)	WD(ARW_EW_TW_LW)	WCW	Multivariate	MV_GEMMA	MA_106297_6413	MA_106297	A/G	0.356	1.42593e-06	0.0233727	4.48006	922.494	1761.79	2684.28	LW density	0.342851	0.277337	0.34
278	Wood density (Annual ring wood, earlywood, transition wood, latewood)	WD(ARW_EW_TW_LW)	WCW	Multivariate	MV_GEMMA	MA_106297_6413	MA_106297	A/G	0.356	1.42593e-06	0.0233727	3.88087	421.929	944.396	1366.32	TW density	0.505439	0.484833	0.34
279	Wood density (Annual ring wood, earlywood, transition wood, latewood)	WD(ARW_EW_TW_LW)	WCW	Multivariate	MV_GEMMA	MA_106297_6469	MA_106297	T/C	0.355	9.10528e-07	0.0170568	4.87969	378.022	1032.07	1410.09	ARW density	0.773312	0.51832	0.34
280	Wood density (Annual ring wood, earlywood, transition wood, latewood)	WD(ARW_EW_TW_LW)	WCW	Multivariate	MV_GEMMA	MA_106297_6469	MA_106297	T/C	0.355	9.10528e-07	0.0170568	5.31772	163.293	459.533	622.826	EW density	2.07923	0.0356028	0.34
281	Wood density (Annual ring wood, earlywood, transition wood, latewood)	WD(ARW_EW_TW_LW)	WCW	Multivariate	MV_GEMMA	MA_106297_6469	MA_106297	T/C	0.355	9.10528e-07	0.0170568	4.61368	922.494	1761.79	2684.28	LW density	0.363149	0.842869	0.34
282	Wood density (Annual ring wood, earlywood, transition wood, latewood)	WD(ARW_EW_TW_LW)	WCW	Multivariate	MV_GEMMA	MA_106297_6469	MA_106297	T/C	0.355	9.10528e-07	0.0170568	3.85783	421.929	944.396	1366.32	TW density	0.498826	0.823872	0.34
283	Wood density (Annual ring wood, earlywood, transition wood, latewood)	WD(ARW_EW_TW_LW)	WCW	Multivariate	MV_GEMMA	MA_29357_4423	MA_29357	T/C	0.187	2.00433e-09	6.5707e-05	5.12894	378.022	1032.07	1410.09	ARW density	0.567244	0.726822	0.17
284	Wood density (Annual ring wood, earlywood, transition wood, latewood)	WD(ARW_EW_TW_LW)	WCW	Multivariate	MV_GEMMA	MA_29357_4423	MA_29357	T/C	0.187	2.00433e-09	6.5707e-05	6.78746	163.293	459.533	622.826	EW density	2.24911	0.0983679	0.17
285	Wood density (Annual ring wood, earlywood, transition wood, latewood)	WD(ARW_EW_TW_LW)	WCW	Multivariate	MV_GEMMA	MA_29357_4423	MA_29357	T/C	0.187	2.00433e-09	6.5707e-05	0.0139105	922.494	1761.79	2684.28	LW density	2.1919e-06	0.651002	0.17
286	Wood density (Annual ring wood, earlywood, transition wood, latewood)	WD(ARW_EW_TW_LW)	WCW	Multivariate	MV_GEMMA	MA_29357_4423	MA_29357	T/C	0.187	2.00433e-09	6.5707e-05	2.06455	421.929	944.396	1366.32	TW density	0.094855	0.578122	0.17
287	Wall thickness (Annual ring wood, earlywood, transition wood, latewood)	WT(ARW_EW_TW_LW)	WCW	Multivariate	MV_GEMMA	MA_29357_4423	MA_29357	T/C	0.187	5.75024e-07	0.0251343	0.014841	0.0073803	0.0219637	0.029344	ARW wall thickness	0.228229	0.398452	0.17
288	Wall thickness (Annual ring wood, earlywood, transition wood, latewood)	WT(ARW_EW_TW_LW)	WCW	Multivariate	MV_GEMMA	MA_29357_4423	MA_29357	T/C	0.187	5.75024e-07	0.0251343	0.0241192	0.00365029	0.0104376	0.0140879	EW wall thickness	1.25558	0.28887	0.17
289	Wall thickness (Annual ring wood, earlywood, transition wood, latewood)	WT(ARW_EW_TW_LW)	WCW	Multivariate	MV_GEMMA	MA_29357_4423	MA_29357	T/C	0.187	5.75024e-07	0.0251343	-0.00690503	0.0375251	0.0682721	0.105797	LW wall thickness	0.0137031	0.434196	0.17
290	Wall thickness (Annual ring wood, earlywood, transition wood, latewood)	WT(ARW_EW_TW_LW)	WCW	Multivariate	MV_GEMMA	MA_29357_4423	MA_29357	T/C	0.187	5.75024e-07	0.0251343	-0.000817508	0.00932251	0.024346	0.0336685	TW wall thickness	0.000603563	0.351001	0.17
291	Wood density (Annual ring wood, earlywood, transition wood, latewood)	WD(ARW_EW_TW_LW)	WCW	Multivariate	MV_GEMMA	MA_63888_14494	MA_63888	A/C	0.137	5.43849e-08	0.0014263	7.2899	378.022	1032.07	1410.09	ARW density	0.891163	0.752568	0.13
292	Wood density (Annual ring wood, earlywood, transition wood, latewood)	WD(ARW_EW_TW_LW)	WCW	Multivariate	MV_GEMMA	MA_63888_14494	MA_63888	A/C	0.137	5.43849e-08	0.0014263	7.67422	163.293	459.533	622.826	EW density	2.23596	0.204315	0.13
293	Wood density (Annual ring wood, earlywood, transition wood, latewood)	WD(ARW_EW_TW_LW)	WCW	Multivariate	MV_GEMMA	MA_63888_14494	MA_63888	A/C	0.137	5.43849e-08	0.0014263	0.675886	922.494	1761.79	2684.28	LW density	0.00402421	0.663957	0.13
294	Wood density (Annual ring wood, earlywood, transition wood, latewood)	WD(ARW_EW_TW_LW)	WCW	Multivariate	MV_GEMMA	MA_63888_14494	MA_63888	A/C	0.137	5.43849e-08	0.0014263	3.46403	421.929	944.396	1366.32	TW density	0.207669	0.448476	0.13
295	Wood density (Annual ring wood, earlywood, transition wood, latewood)	WD(ARW_EW_TW_LW)	WCW	Multivariate	MV_GEMMA	MA_63888_14499	MA_63888	G/C	0.136	1.14443e-07	0.00250114	7.19892	378.022	1032.07	1410.09	ARW density	0.863715	0.752568	0.13
296	Wood density (Annual ring wood, earlywood, transition wood, latewood)	WD(ARW_EW_TW_LW)	WCW	Multivariate	MV_GEMMA	MA_63888_14499	MA_63888	G/C	0.136	1.14443e-07	0.00250114	7.53793	163.293	459.533	622.826	EW density	2.14398	0.276281	0.13
297	Wood density (Annual ring wood, earlywood, transition wood, latewood)	WD(ARW_EW_TW_LW)	WCW	Multivariate	MV_GEMMA	MA_63888_14499	MA_63888	G/C	0.136	1.14443e-07	0.00250114	0.746177	922.494	1761.79	2684.28	LW density	0.00487458	0.663957	0.13
298	Wood density (Annual ring wood, earlywood, transition wood, latewood)	WD(ARW_EW_TW_LW)	WCW	Multivariate	MV_GEMMA	MA_63888_14499	MA_63888	G/C	0.136	1.14443e-07	0.00250114	3.41147	421.929	944.396	1366.32	TW density	0.200176	0.448476	0.13
299	Latewood (Coarseness, wood density, radial tracheid width, tangential tracheid width)	LW(C_WD_RTW_TTW)	WCW	Multivariate	MV_GEMMA	MA_436199_1316	MA_436199	G/A	0.028	2.01535e-08	0.00264273	-2.15511	444.803	1773.37	2218.17	LW coarseness	0.0113972	0.429797	0.03
300	Latewood (Coarseness, wood density, radial tracheid width, tangential tracheid width)	LW(C_WD_RTW_TTW)	WCW	Multivariate	MV_GEMMA	MA_436199_1316	MA_436199	G/A	0.028	2.01535e-08	0.00264273	-6.91439	984.929	1703.64	2688.57	LW density	0.0967922	0.376818	0.03
301	Latewood (Coarseness, wood density, radial tracheid width, tangential tracheid width)	LW(C_WD_RTW_TTW)	WCW	Multivariate	MV_GEMMA	MA_436199_1316	MA_436199	G/A	0.028	2.01535e-08	0.00264273	0.265818	0.344381	1.06066	1.40504	LW radial tracheid width	0.273737	0.281171	0.03
302	Latewood (Coarseness, wood density, radial tracheid width, tangential tracheid width)	LW(C_WD_RTW_TTW)	WCW	Multivariate	MV_GEMMA	MA_436199_1316	MA_436199	G/A	0.028	2.01535e-08	0.00264273	0.0868862	0.129391	1.48787	1.61726	LW tangential tracheid width	0.0254083	0.0239763	0.03
303	Number of cells (Annual ring wood, earlywood, transition wood, latewood)	NC(ARW_EW_TW_LW)	WCW	Multivariate	MV_GEMMA	MA_10428864_2972	MA_10428864	T/C	0.161	2.21115e-06	0.042459	-3.08831	25.8357	421.367	447.203	ARW number of cells	0.576174	0.850763	0.17
304	Number of cells (Annual ring wood, earlywood, transition wood, latewood)	NC(ARW_EW_TW_LW)	WCW	Multivariate	MV_GEMMA	MA_10428864_2972	MA_10428864	T/C	0.161	2.21115e-06	0.042459	-4.04664	20.4958	222.717	243.213	EW number of cells	1.81895	0.772709	0.17
305	Number of cells (Annual ring wood, earlywood, transition wood, latewood)	NC(ARW_EW_TW_LW)	WCW	Multivariate	MV_GEMMA	MA_10428864_2972	MA_10428864	T/C	0.161	2.21115e-06	0.042459	0.617341	2.68258	12.3092	14.9918	LW number of cells	0.686777	0.469883	0.17
306	Number of cells (Annual ring wood, earlywood, transition wood, latewood)	NC(ARW_EW_TW_LW)	WCW	Multivariate	MV_GEMMA	MA_10428864_2972	MA_10428864	T/C	0.161	2.21115e-06	0.042459	0.0711616	12.8019	113.984	126.786	TW number of cells	0.00107904	0.0334143	0.17
307	Number of cells (Annual ring wood, earlywood, transition wood, latewood)	NC(ARW_EW_TW_LW)	WCW	Multivariate	MV_GEMMA	MA_47138_9803	MA_47138	A/G	0.067	2.6976e-07	0.0117912	3.17573	25.8357	421.367	447.203	ARW number of cells	0.281948	0.231385	0.07
308	Number of cells (Annual ring wood, earlywood, transition wood, latewood)	NC(ARW_EW_TW_LW)	WCW	Multivariate	MV_GEMMA	MA_47138_9803	MA_47138	A/G	0.067	2.6976e-07	0.0117912	-1.04234	20.4958	222.717	243.213	EW number of cells	0.0558491	0.621724	0.07
309	Number of cells (Annual ring wood, earlywood, transition wood, latewood)	NC(ARW_EW_TW_LW)	WCW	Multivariate	MV_GEMMA	MA_47138_9803	MA_47138	A/G	0.067	2.6976e-07	0.0117912	1.64745	2.68258	12.3092	14.9918	LW number of cells	2.26339	0.434438	0.07
310	Number of cells (Annual ring wood, earlywood, transition wood, latewood)	NC(ARW_EW_TW_LW)	WCW	Multivariate	MV_GEMMA	MA_47138_9803	MA_47138	A/G	0.067	2.6976e-07	0.0117912	3.82313	12.8019	113.984	126.786	TW number of cells	1.4413	0.390746	0.07
311	Number of cells (Annual ring wood, earlywood, transition wood, latewood)	NC(ARW_EW_TW_LW)	WCW	Multivariate	MV_GEMMA	MA_9831023_767	MA_9831023	A/G	0.056	2.05495e-06	0.042459	2.66311	25.8357	421.367	447.203	ARW number of cells	0.167673	0.115429	0.07
312	Number of cells (Annual ring wood, earlywood, transition wood, latewood)	NC(ARW_EW_TW_LW)	WCW	Multivariate	MV_GEMMA	MA_9831023_767	MA_9831023	A/G	0.056	2.05495e-06	0.042459	-1.37113	20.4958	222.717	243.213	EW number of cells	0.0817266	0.265983	0.07
313	Number of cells (Annual ring wood, earlywood, transition wood, latewood)	NC(ARW_EW_TW_LW)	WCW	Multivariate	MV_GEMMA	MA_9831023_767	MA_9831023	A/G	0.056	2.05495e-06	0.042459	1.57707	2.68258	12.3092	14.9918	LW number of cells	1.75404	0.718103	0.07
314	Number of cells (Annual ring wood, earlywood, transition wood, latewood)	NC(ARW_EW_TW_LW)	WCW	Multivariate	MV_GEMMA	MA_9831023_767	MA_9831023	A/G	0.056	2.05495e-06	0.042459	3.68836	12.8019	113.984	126.786	TW number of cells	1.13445	0.239246	0.07
315	Number of cells (Annual ring wood, earlywood, transition wood, latewood)	NC(ARW_EW_TW_LW)	WCW	Multivariate	MV_GEMMA	MA_9831023_768	MA_9831023	A/G	0.056	2.05495e-06	0.042459	2.66311	25.8357	421.367	447.203	ARW number of cells	0.167673	0.115429	0.07
316	Number of cells (Annual ring wood, earlywood, transition wood, latewood)	NC(ARW_EW_TW_LW)	WCW	Multivariate	MV_GEMMA	MA_9831023_768	MA_9831023	A/G	0.056	2.05495e-06	0.042459	-1.37113	20.4958	222.717	243.213	EW number of cells	0.0817266	0.265983	0.07
317	Number of cells (Annual ring wood, earlywood, transition wood, latewood)	NC(ARW_EW_TW_LW)	WCW	Multivariate	MV_GEMMA	MA_9831023_768	MA_9831023	A/G	0.056	2.05495e-06	0.042459	1.57707	2.68258	12.3092	14.9918	LW number of cells	1.75404	0.718103	0.07
318	Number of cells (Annual ring wood, earlywood, transition wood, latewood)	NC(ARW_EW_TW_LW)	WCW	Multivariate	MV_GEMMA	MA_9831023_768	MA_9831023	A/G	0.056	2.05495e-06	0.042459	3.68836	12.8019	113.984	126.786	TW number of cells	1.13445	0.179776	0.07
319	Wood density (Annual ring wood, earlywood, transition wood, latewood)	WD(ARW_EW_TW_LW)	WCW	Multivariate	MV_GEMMA	MA_876922_3616	MA_876922	A/G	0.389	3.41263e-06	0.049722	4.06311	378.022	1032.07	1410.09	ARW density	0.556532	0.358643	0.37
320	Wood density (Annual ring wood, earlywood, transition wood, latewood)	WD(ARW_EW_TW_LW)	WCW	Multivariate	MV_GEMMA	MA_876922_3616	MA_876922	A/G	0.389	3.41263e-06	0.049722	4.60594	163.293	459.533	622.826	EW density	1.61916	0.276281	0.37
321	Wood density (Annual ring wood, earlywood, transition wood, latewood)	WD(ARW_EW_TW_LW)	WCW	Multivariate	MV_GEMMA	MA_876922_3616	MA_876922	A/G	0.389	3.41263e-06	0.049722	0.0270792	922.494	1761.79	2684.28	LW density	1.29856e-05	0.944988	0.37
322	Wood density (Annual ring wood, earlywood, transition wood, latewood)	WD(ARW_EW_TW_LW)	WCW	Multivariate	MV_GEMMA	MA_876922_3616	MA_876922	A/G	0.389	3.41263e-06	0.049722	1.58035	421.929	944.396	1366.32	TW density	0.0868902	0.673846	0.37
323	Transition wood (Ring width, wood density, coarseness, number of cells)	TW(RW_WD_C_NC)	WCW	Multivariate	MV_GEMMA	MA_12842_2389	MA_12842	T/A	0.109	9.58302e-07	0.0333135	-5.37631	95.1011	1065.4	1160.5	TW coarseness	0.483791	0.306234	0.09
324	Transition wood (Ring width, wood density, coarseness, number of cells)	TW(RW_WD_C_NC)	WCW	Multivariate	MV_GEMMA	MA_12842_2389	MA_12842	T/A	0.109	9.58302e-07	0.0333135	6.97523	362.257	1002.27	1364.53	TW density	0.692578	0.325683	0.09
325	Transition wood (Ring width, wood density, coarseness, number of cells)	TW(RW_WD_C_NC)	WCW	Multivariate	MV_GEMMA	MA_12842_2389	MA_12842	T/A	0.109	9.58302e-07	0.0333135	-1.67157	18.8835	130.951	149.834	TW number of cells	0.362218	0.958962	0.09
326	Transition wood (Ring width, wood density, coarseness, number of cells)	TW(RW_WD_C_NC)	WCW	Multivariate	MV_GEMMA	MA_12842_2389	MA_12842	T/A	0.109	9.58302e-07	0.0333135	-1.59804	4.08881	24.571	28.6598	TW ring width	1.73076	0.0200143	0.09
327	Transition wood (Ring width, wood density, coarseness, number of cells)	TW(RW_WD_C_NC)	WCW	Multivariate	MV_GEMMA	MA_12842_2476	MA_12842	C/G	0.148	7.21626e-07	0.0333135	-3.78392	95.1011	1065.4	1160.5	TW coarseness	0.31115	0.699834	0.13
328	Transition wood (Ring width, wood density, coarseness, number of cells)	TW(RW_WD_C_NC)	WCW	Multivariate	MV_GEMMA	MA_12842_2476	MA_12842	C/G	0.148	7.21626e-07	0.0333135	6.8591	362.257	1002.27	1364.53	TW density	0.869528	0.291049	0.13
329	Transition wood (Ring width, wood density, coarseness, number of cells)	TW(RW_WD_C_NC)	WCW	Multivariate	MV_GEMMA	MA_12842_2476	MA_12842	C/G	0.148	7.21626e-07	0.0333135	-1.3275	18.8835	130.951	149.834	TW number of cells	0.296613	0.97289	0.13
330	Transition wood (Ring width, wood density, coarseness, number of cells)	TW(RW_WD_C_NC)	WCW	Multivariate	MV_GEMMA	MA_12842_2476	MA_12842	C/G	0.148	7.21626e-07	0.0333135	-1.36778	4.08881	24.571	28.6598	TW ring width	1.64623	0.0200907	0.13
331	Transition wood (Ring width, wood density, coarseness, number of cells)	TW(RW_WD_C_NC)	WCW	Multivariate	MV_GEMMA	MA_12842_2490	MA_12842	C/G	0.11	1.0162e-06	0.0333135	-5.25842	95.1011	1065.4	1160.5	TW coarseness	0.466528	0.0622267	0.09
332	Transition wood (Ring width, wood density, coarseness, number of cells)	TW(RW_WD_C_NC)	WCW	Multivariate	MV_GEMMA	MA_12842_2490	MA_12842	C/G	0.11	1.0162e-06	0.0333135	6.92277	362.257	1002.27	1364.53	TW density	0.687686	0.463216	0.09
333	Transition wood (Ring width, wood density, coarseness, number of cells)	TW(RW_WD_C_NC)	WCW	Multivariate	MV_GEMMA	MA_12842_2490	MA_12842	C/G	0.11	1.0162e-06	0.0333135	-1.56621	18.8835	130.951	149.834	TW number of cells	0.320552	0.753904	0.09
334	Transition wood (Ring width, wood density, coarseness, number of cells)	TW(RW_WD_C_NC)	WCW	Multivariate	MV_GEMMA	MA_12842_2490	MA_12842	C/G	0.11	1.0162e-06	0.0333135	-1.5586	4.08881	24.571	28.6598	TW ring width	1.65962	0.938132	0.09
335	Transition wood (Ring width, wood density, coarseness, number of cells)	TW(RW_WD_C_NC)	WCW	Multivariate	MV_GEMMA	MA_183130_3773	MA_183130	T/C	0.228	5.21176e-07	0.0333135	-2.16907	95.1011	1065.4	1160.5	TW coarseness	0.142719	0.940171	0.23
336	Transition wood (Ring width, wood density, coarseness, number of cells)	TW(RW_WD_C_NC)	WCW	Multivariate	MV_GEMMA	MA_183130_3773	MA_183130	T/C	0.228	5.21176e-07	0.0333135	1.78748	362.257	1002.27	1364.53	TW density	0.0824291	0.313483	0.23
337	Transition wood (Ring width, wood density, coarseness, number of cells)	TW(RW_WD_C_NC)	WCW	Multivariate	MV_GEMMA	MA_183130_3773	MA_183130	T/C	0.228	5.21176e-07	0.0333135	-0.777033	4.08881	24.571	28.6598	TW ring width	0.74163	0.753151	0.23
338	Transition wood (Ring width, wood density, coarseness, number of cells)	TW(RW_WD_C_NC)	WCW	Multivariate	MV_GEMMA	MA_183130_3773	MA_183130	T/C	0.228	5.21176e-07	0.0333135	-0.698547	18.8835	130.951	149.834	TW number of cells	0.114647	0.179776	0.23
Wood type: including the whole core wood (WCW), Juvenile wood (JW), and mature wood (MW); Model type: including Univariate and Multivariate GWAS; Method: including BLINK, univariate GEMMA (UV_GEMMA); multivariate GEMMA (MV-GEMMA); SNP in each contig and their relevant allele frequency (MAF) in GWAS population;
FDR_Ajusted_P value: False discovery corrected P value; PVE: proportion of variance explianed; Trait_UV/MV: the trait matching to PEV in univariate models or multivariate GEMMA; Vadd: additive variance estimated in relevant GWAS; Ve: residual variance estimated in the relevant GWAS; Vphe: Phenotypic variance estimated the relevant GWAS model
The colors of shade represent the results from different wood types.
* presents that the results from the validation population (476 parental individuals).

## Sheet: Table S4 gene and annotation
Table S4 Candiate genes detected by GWAS. Associated SNPs and candiate genes and detected by BLINK and univariate GEMMA (UV-GEMMA) and multivariate GEMMA (MV-GEMMA) GWAS from the whole core wood (WCW), juvenile wood (JW), and mature wood (MW) based on an adjusted FDR P<0.05 with genes and their putative gene function
Trait/traitset	Abbreviation	Wood type	Contig	SNP position*	Gene model	Method	P-value	FDR adjusted P-value	Putative function	Distance (basepair) to candidate gene
Transition wood density	TWD	JW	MA_10277463	MA_10277463_4132	MA_10277463g0010	BLINK	9.66e-08	0.0127	3-phosphoinositide-dependent kinase-1	Inside
Latewood density	LWD	JW	MA_11005	MA_11005_24095	MA_11005g0010	BLINK	2.61e-07	0.0171	Kinase superfamily	Inside
Latewood density	LWD	JW	MA_118436	MA_118436_1478	MA_118436g0010	BLINK	1.72e-06	0.045	Pre-mRNA-splicing factor ISY1 homolog	Inside
Latewood density	LWD	JW	MA_14038	MA_14038_26748	MA_14038g0010	BLINK	5.37e-07	0.0176	GATA transcription factor 12-like	Inside
Annual ring wood microfibrial angle	MFA	JW	MA_140464	MA_140464_12338	MA_140464g0010	BLINK	1.1e-07	0.0144	Unknown	Inside
Latewood density	LWD	JW	MA_183273	MA_183273_8768	MA_183273g0020	BLINK	1.25e-07	0.0164	Guanine nucleotide-binding subunit gamma 2-like	Inside
Earlywood tangential tracheid width	ETTW	JW	MA_228591	MA_228591_5756	MA_228591g0010	BLINK	2.05e-07	0.0269	---NA---	Inside
Latewood coarseness	LC	JW	MA_426944	MA_426944_681	MA_426944g0010	UV-GEMMA	1.3e-06	0.0426	uncharacterized protein LOC18431142	Inside
Latewood coarseness, Latewood wall thickness	LC, LWT	JW	MA_482092	MA_482092_7571	MA_482092g0010	UV-GEMMA	4.18e-08	0.00549	---NA---	Inside
Latewood coarseness	LC	JW	MA_66354	MA_66354_1729	MA_66354g0010	UV-GEMMA	6.47e-07	0.0287	Hypothetical protein AXG93_3960s1300	Inside
Latewood density	LWD	JW	MA_69436	MA_69436_29092	MA_69436g0010	BLINK	5.2e-07	0.0176	pentatricopeptide repeat-containing At5g61400	Inside
Annual ring wood(Number of cells, ring width, radial tracheid width)	ARW(NC_RW_RTW)	JW	MA_77420	MA_77420_25321	MA_77420g0010	MV-GEMMA	1.39e-07	0.0183	Ethylene-responsive transcription factor ESR2-like	Inside
Wood density (Annual ring wood, earlywood, transition wood, latewood)	WD(ARW_EW_TW_LW)	JW	MA_879701	MA_879701_2856	MA_879701g0010	MV-GEMMA	6.4541e-07	0.0423	Unknown	Inside
Annual ring wood(Modulus of elasticity, wood density, mirofibril angle), Earlywood density, earlywood(Ring width, wood density, coarseness, number of cells), earlywood (wood density, radial tracheid width, tangential tracheid width, coarseness), earlywood (number of cells, ring width, radial tracheid width), Wood denisty (Annual ring wood, earlywood, transtionwood, latewood), Annual ring wood(woo…	ARW(WD_MFA_MOE), EWD, EW(RW_WD_C_NC), EW(WD_RTW_TTW_C), EW(NC_RW_RTW), WD(Mean_EW_TW_LW), ARW(WD_RTW_TTW_C), ETTW, RW, TRW, NC(ARW_EW_TW_LW), TTW(ARW_EW_TW_LW), WT(ARW_EW_TW_LW), TW(RW_WD_C_NC), TW(NC_RW_RTW)	JW, MW, WCW	MA_12842	MA_12842_2490	MA_12842g0010	BLINK, UV_GEMMA, MV-GEMMA	<2.27E-06	<0.05	Mitogen-activated kinase kinase kinase A-like	-2316
Annual ring wood(Modulus of elasticity, wood density, mirofibril angle), Earlywood density, earlywood(Ring width, wood density, coarseness, number of cells), earlywood (wood density, radial tracheid width, tangential tracheid width, coarseness), earlywood (number of cells, ring width, radial tracheid width), Wood denisty (Annual ring wood, earlywood, transtionwood, latewood), Annual ring wood(woo…	ARW(WD_MFA_MOE), EWD, EW(RW_WD_C_NC), EW(WD_RTW_TTW_C), EW(NC_RW_RTW), WD(Mean_EW_TW_LW), ARW(WD_RTW_TTW_C), ETTW, RW, TRW, NC(ARW_EW_TW_LW), TTW(ARW_EW_TW_LW), WT(ARW_EW_TW_LW), TW(RW_WD_C_NC), TW(NC_RW_RTW)	JW, MW, WCW	MA_12842	MA_12842_2490	MA_12842g0020	BLINK, UV_GEMMA, MV-GEMMA	<2.27E-06	<0.05	Mitogen-activated kinase kinase kinase A-like	inside
Annual ring wood(Modulus of elasticity, wood density, mirofibril angle), Earlywood density, earlywood(Ring width, wood density, coarseness, number of cells), earlywood (wood density, radial tracheid width, tangential tracheid width, coarseness), earlywood (number of cells, ring width, radial tracheid width), Wood denisty (Annual ring wood, earlywood, transtionwood, latewood), Annual ring wood(woo…	ARW(WD_MFA_MOE), EWD, EW(RW_WD_C_NC), EW(WD_RTW_TTW_C), EW(NC_RW_RTW), WD(Mean_EW_TW_LW), ARW(WD_RTW_TTW_C), ETTW, RW, TRW, NC(ARW_EW_TW_LW), TTW(ARW_EW_TW_LW), WT(ARW_EW_TW_LW), TW(RW_WD_C_NC), TW(NC_RW_RTW)	JW, MW, WCW	MA_12842	MA_12842_2490	MA_12842g0030	BLINK, UV_GEMMA, MV-GEMMA	<2.27E-06	<0.05	Mitogen-activated kinase kinase kinase NPK1-like	+19429
Earlywood density	EWD	MW	MA_10428113	MA_10428113_5084	MA_10428113g0010	BLINK	5.97e-07	0.0157	Cysteine synthase-like	Inside
Latewood ring width, latewood number of cells	LRW, LNC	MW	MA_10431885	MA_10431885_2231	MA_10431885g0010	UV-GEMMA	6.36e-08	0.00834	uncharacterized protein LOC107492792	Inside
Transtion wood wall thickness	TWT	MW	MA_10432069	MA_10432069_9424	MA_10432069g0010	BLINK	1.23e-07	0.0161	4-coumarate-- ligase-like 5	-7382
Transtion wood wall thickness	TWT	MW	MA_10432069	MA_10432069_9424	MA_10432069g0020	BLINK	1.23e-07	0.0161	4-coumarate-- ligase-like 5	inside
Latewood ring width	LRW	MW	MA_10432667	MA_10432667_767	MA_10432667g0010	BLINK	4.8e-07	0.0315	Cullin-3A-like isoform X1/ATCUL3A	inside
Latewood ring width	LRW	MW	MA_10432667	MA_10432667_767	MA_10432667g0020	BLINK	4.8e-07	0.0315	Cullin-3A-like isoform X1/ATCUL3A	+3859
Latewood ring width	LRW	MW	MA_10432667	MA_10432667_767	MA_10432667g0030	BLINK	4.8e-07	0.0315	Cullin-3A-like isoform X1/ATCUL3A	+8338
Latewood ring width	LRW	MW	MA_108175	MA_108175_933	MA_108175g0010	UV-GEMMA	2.23e-06	0.0488	D -box splicing factor binding site-domain-containing/MOS2	Inside
Latewood ring width	LRW	MW	MA_108928	MA_108928_3179	MA_108928g0010	UV-GEMMA	6.7e-07	0.022	Elicitor-responsive 3	Inside
Earlywood density	EWD	MW	MA_113808	MA_113808_27662	MA_113808g0020	BLINK	1.33e-06	0.029	Unknown	Inside
Earlywood density	EWD	MW	MA_113962	MA_113962_5891	MA_113962g0010	BLINK	2.99e-08	0.00131	2-isopropylmalate synthase B	Inside
Earlywood (Wood density, radial tracheid width, tangential tracheid width, coarseness)	EW(WD_RTW_TTW_C)	MW	MA_114314	MA_114314_7847	MA_114314g0010	MV-GEMMA	1.86e-06	0.0488	C2 calcium-dependent membrane targeting	Inside
Earlywood ring width, earlywood number of cells	ERW, ENC	MW	MA_125978	MA_125978_3122	MA_125978g0010	UV-GEMMA	1.94e-07	0.0255	Deucine-rich repeat receptor-like tyrosine- kinase PXC3	inside
Earlywood ring width, earlywood number of cells	ERW, ENC	MW	MA_125978	MA_125978_3122	MA_125978g0020	UV-GEMMA	1.94e-07	0.0255	Dihydroflavonol 4-reductase	3146
Latewood ring width	LRW	MW	MA_139242	MA_139242_9326	MA_139242g0010	BLINK	1.09e-08	0.00143	Hypothetical protein, partial	Inside
Earlywood (Wood density, radial tracheid width, tangential tracheid width, coarseness)	EW(WD_RTW_TTW_C)	MW	MA_15237	MA_15237_12985	MA_15237g0010	MV-GEMMA	2.98e-07	0.00976	Probable E3 ubiquitin ligase SUD1 isoform X1	Inside
Earlywood density	EWD	MW	MA_17597	MA_17597_20684	MA_17597g0010	BLINK	1.6e-07	0.00524	Late embryo abundance	Inside
Latewood ring width, latewood number of cells	LRW, LNC	MW	MA_184308	MA_184308_3458	MA_184308g0010	UV-GEMMA	4.7e-07	0.0205	Orbitol dehydrogenase	Inside
Earlywood density, Annual ring wood wood density	EWD, WD	MW	MA_25654	MA_25654_27839	MA_25654g0010	BLINK	1.28e-08	0.000837	3-oxoacyl-[acyl-carrier- ] reductase 4-like	Inside
Latewood ring width	LRW	MW	MA_330891	MA_330891_664	MA_330891g0010	UV-GEMMA	1.74e-06	0.0456	D-alanine--D-alanine ligase family isoform 4	Inside
Latewood density	LWD	MW	MA_360415	MA_360415_6124	MA_360415g0010	BLINK	1.86e-07	0.0244	Ribosomal L7 L12 domain-containing	Inside
Latewood ring width, latewood number of cells	LRW, LNC	MW	MA_6124	MA_6124_7682	MA_6124g0010	UV-GEMMA	2.39e-07	0.0157	Polyphenol oxidase	inside
Latewood ring width, latewood number of cells	LRW, LNC	MW	MA_6124	MA_6124_7682	MA_6124g0020	UV-GEMMA	2.39e-07	0.0157	Polyphenol oxidase	+6548
Earlywood wall thickness	EWT	MW	MA_7188813	MA_7188813_854	MA_7188813g0010	BLINK	4.51e-07	0.0296	---NA---	Inside
Earlywood tangential tracheid width	ETTW	MW	MA_7439660	MA_7439660_2518	MA_7439660g0010	BLINK	2.19e-07	0.0143	IQ domain-containing IQM3-like	Inside
Transtion wood (Ring width, wood density, coarseness, number of cells)	TW(RW_WD_C_NC)	MW	MA_8367646	MA_8367646_2532	MA_8367646g0010	MV-GEMMA	2e-07	0.0262	Probable xyloglucan endotransglucosylase hydrolase 23/XTH15	Inside
Annual ring wood wall thickness	WT	MW	MA_8861445	MA_8861445_762	MA_8861445g0010	UV-GEMMA	2.95e-07	0.0387	GPI inositol-deacylase-like	Inside
Latewood coarseness	LC	MW	MA_8964699	MA_8964699_5244	MA_8964699g0010	BLINK	6.07e-09	0.000796	MOTHER of FT and TFL1-like isoform X2	Inside
Annual ring wood(Coarseness, density, radial tracheid width, tangential tracheid width)	ARW(C_WD_RTW_TTW)	MW	MA_912814	MA_912814_5780	MA_912814g0010	MV-GEMMA	2.28e-07	0.0226	---NA---	Inside
Transition wood density	TWD	MW	MA_9146503	MA_9146503_3946	MA_9146503g0010	BLINK	2.91e-07	0.0382	FACT complex subunit SSRP1-like	Inside
Earlywood wall thickness	EWT	MW	MA_9448764	MA_9448764_2532	MA_9448764g0010	BLINK	2.29e-07	0.0296	Purple acid phosphatase 3-like	Inside
Latewood coarseness	LC	MW	MA_95898	MA_95898_47466	MA_95898g0010#	BLINK	9.81e-08	0.00643	No apical meristem	Inside
Earlywood percentage	EP	WCW	MA_100689	MA_100689_23097	MA_100689g0010	BLINK	1.96e-07	0.0128	---NA---	Inside
Earlywood density	EWD	WCW	MA_10117117	MA_10117117_4107	MA_10117117g0010	UV-GEMMA	3.77e-07	0.00561	Mitogen-activated kinase kinase kinase NPK1-like	Inside
Annual ring wood number of cells	NC	WCW	MA_10425958	MA_10425958_1555	MA_10425958g0010	BLINK	1.07e-07	0.00468	Kinesin KIN- mitochondrial isoform X1	Inside
Latewood number of cells	LNC	WCW	MA_10426292	MA_10426292_14560	MA_10426292g0020	BLINK	2.55e-07	0.0335	---NA---	Inside
Earlywood wall thickness	EWT	WCW	MA_10427326	MA_10427326_2713	MA_10427326g0010	BLINK	6.16e-08	0.00808	Ras-related RABB1c	Inside
Transition number of cells	TNC	WCW	MA_10428274	MA_10428274_929	MA_10428274g0010	BLINK	1.38e-07	0.0181	Centromere S	inside
Transition number of cells	TNC	WCW	MA_10428274	MA_10428274_929	MA_10428274g0020	BLINK	1.38e-07	0.0181	Centromere S	+15608
Earlywood percentage	EP	WCW	MA_10428431	MA_10428431_1990	MA_10428431g0010	UV-GEMMA	7.15e-07	0.0469	Anaphase-promoting complex subunit 1	Inside
Number of cells (Annual ring wood, earlywood, transtion wood, latewood)	NC(ARW_EW_TW_LW)	WCW	MA_10428864	MA_10428864_2972	MA_10428864g0010	MV-GEMMA	2.21e-06	0.0425	Anaphase-promoting complex subunit 1	Inside
Transition wood coarseness	TC	WCW	MA_10433057	MA_10433057_20501	MA_10433057g0020	BLINK	1.44e-06	0.0473	---NA---	Inside
Annual ring wood number of cells	NC	WCW	MA_10434168	MA_10434168_1291	MA_10434168g0010	BLINK	2.05e-06	0.0383	Rhomboid mitochondrial	inside
Annual ring wood number of cells	NC	WCW	MA_10434168	MA_10434168_1291	MA_10434168g0020	BLINK	2.05e-06	0.0383	Rhomboid mitochondrial	+14406
Transition wood coarseness	TC	WCW	MA_10436600	MA_10436600_2140	MA_10436600g0010	BLINK	1.06e-08	0.0014	N-acylphosphatidylethanolamine synthase	Inside
Earlywood density, wood density(Annual ring wood, earlywood, transition wood, latewood)	EWD, WD(ARW_EW_TW_LW)	WCW	MA_106297	MA_106297_6413	MA_106297g0010	UV-GEMMA	3.85e-07	0.00561	Mitogen-activated kinase kinase kinase NPK1-like	Inside
Annual ring wood number of cells	NC	WCW	MA_128658	MA_128658_8024	MA_128658g0010#	BLINK	3.23e-08	0.00212	B-box zinc finger 22-like	Inside
Annual ring wood number of cells	NC	WCW	MA_141147	MA_141147_11247	MA_141147g0010	BLINK	6.26e-07	0.0164	DEHYDRATION-INDUCED 19 isoform X2	Inside
Annual ring wood number of cells	NC	WCW	MA_15508	MA_15508_8004	MA_15508g0010	BLINK	1.54e-06	0.0336	Glutamine synthetase	Inside
Transtion wood (Ring width, wood density, coarseness, number of cells)	TW(RW_WD_C_NC)	WCW	MA_183130	MA_183130_3773	MA_183130g0010	MV-GEMMA	5.21e-07	0.0333	Cellulose synthase family proteim/ AtCesA7	inside
Transtion wood (Ring width, wood density, coarseness, number of cells)	TW(RW_WD_C_NC)	WCW	MA_183130	MA_183130_3773	MA_183130g0020	MV-GEMMA	5.21e-07	0.0333	Cellulose synthase A4/ AtCesA4	+7938
Transition wood coarseness, Annual ring wood coarseness	TC, C	WCW	MA_200163	MA_200163_3461	MA_200163g0010	BLINK, UV_GEMMA	8.58e-07	0.0375	AUGMIN subunit 2	Inside
Annual ring wood number of cells, Annual ring wood ring width	NC, RW	WCW	MA_20483	MA_20483_16380	MA_20483g0010	BLINK	1.2e-09	0.000157	Pentatricopeptide repeat-containing At5g01110	Inside
Transition wood coarseness, Annual ring wood coarseness, Annual ring wood wall thickness	TC, C, WT	WCW	MA_27406	MA_27406_11793	MA_27406g0010	BLINK, UV_GEMMA	3.59e-07	0.0236	NDR1 HIN1 12	Inside
Earlywood percentage	EP	WCW	MA_289646	MA_289646_3528	MA_289646g0010	BLINK	5.52e-07	0.0241	E3 ubiquitin- ligase ATL23	Inside
Earlywood density, Earlywood (wood density, radial tracheid width, tangential tracheid width, coarseness), wood density (Annual ring wood, earlywood, transtion wood, latewood), wall thickness (mean, earlywood, transition wood, latewood)	EWD, EW(WD_RTW_TTW_C), WD(ARW_EW_TW_LW), WT(ARW_EW_TW_LW)	WCW	MA_29357	MA_29357_4423	MA_29357g0010	UV-GEMMA, MV-GEMMA	9.95e-08	0.00313	Mitogen-activated kinase kinase kinase NPK1-like	Inside
Annual ring wood number of cells	NC	WCW	MA_34433	MA_34433_11887	MA_34433g0010	BLINK	3.24e-07	0.0106	V-type proton ATPase subunit e1-like	Inside
Transtion wood ring width	TRW	WCW	MA_42658	MA_42658_7332	MA_42658g0010	BLINK	1.45e-07	0.0191	DETOXIFICATION 33	-644
Transtion wood ring width	TRW	WCW	MA_42658	MA_42658_7332	MA_42658g0020	BLINK	1.45e-07	0.0191	DETOXIFICATION 29-like	inside
Latewood (coarseness, density, radial tracheid width, tangential tracheid width)	LW(C_WD_RTW_TTW)	WCW	MA_436199	MA_436199_1316	MA_436199g0010	MV-GEMMA	2.01535e-08	0.00264273	Chloroplast beta-amylase (AtBAM3)	Inside
Annual ring wood ring with	RW	WCW	MA_464588	MA_464588_5453	MA_464588g0010	BLINK	5.77e-08	0.00378	BIG GRAIN 1-like A	Inside
Number of cells (Annual ring wood, earlywood, transtion wood, latewood)	NC(ARW_EW_TW_LW)	WCW	MA_47138	MA_47138_9803	MA_47138g0010	MV-GEMMA	2.7e-07	0.0118	---NA---	Inside
Earlywood percentage, tangential tracheid width (Annual ring wood, earlywood, transition wood, latewood)	EP, TTW(ARW_EW_TW_LW)	WCW	MA_5468	MA_5468_9193	MA_5468g0010	BLINK, UV_GEMMA, MV-GEMMA	1.41e-10	1.85e-05	Nascent polypeptide-associated complex subunit alpha 1	Inside
Earlywood density, wood density (Annual ring wood, earlywood, transition wood, latewood)	EWD, WD(ARW_EW_TW_LW)	WCW	MA_63888	MA_63888_14494	MA_63888g0010	UV-GEMMA, MV-GEMMA	1.19e-07	0.00313	---NA---	Inside
Annual ring wood ring with	RW	WCW	MA_64117	MA_64117_9434	MA_64117g0010	BLINK	3.42e-07	0.0112	Leucine-rich repeat receptor-like serine threonine- kinase BAM1	Inside
Wood density (Annual ring wood, earlywood, transition wood, latewood)	WD(ARW_EW_TW_LW)	WCW	MA_876922	MA_876922_3616	MA_876922g0010	MV-GEMMA	3.41e-06	0.0497	Mitogen-activated kinase kinase kinase NPK1-like	Inside
Annual ring wood ring with	RW	WCW	MA_9035900	MA_9035900_2277	MA_9035900g0010	BLINK	1.44e-07	0.0063	Heat shock 22 kDa mitochondrial isoform X2	Inside
Annual ring wood modulus of elasticity	MOE	WCW	MA_9349488	MA_9349488_789	MA_9349488g0010	BLINK	1.54e-08	0.00202	Transmembrane (DUF1068)	Inside
Number of cells (Annual ring wood, earlywood, transtion wood, latewood)	NC(ARW_EW_TW_LW)	WCW	MA_9831023	MA_9831023_767	MA_9831023g0010	MV-GEMMA	2.05e-06	0.0425	Transcription factor jumonji domain	Inside
* represents that there could be has several associated positions within a contig, but here we only randomly selected one of them. If there is other associated SNPs in the same contig, they could be found in Table S2.
The cell filled in red represents that the contig harbours more than one were detected as candidate genes.
# presents that the genes are annotated as transcription factor

## Sheet: Table S5 PEV
Table S5 Number of SNPs associated with traits and proportion of phenotypic variance explained (PVE) by associated SNPs
Woodtype	Trait	Number of SNPs	PVE*
JW	EW density	5	2.16188
JW	EW tangential tracheid width	4	1.65092
JW	LW coarseness	4	5.64635
JW	LW density	7	6.08904
JW	LW wall thickness	1	1.77109
JW	Annual ring wood wood density	5	1.51237
JW	Annual ring wood radial tracheid width	1	0.306311
JW	Annual ring wood MFA	4	2.30123
JW	Annual ring wood MOE	3	0.0717608
JW	Annual ring wood number of cells	1	0
JW	TW density	3	1.80359
JW	Annual ring wood ring width	1	0
MW	EW coarseness	5	0.0121622
MW	EW density	10	6.62191
MW	EW radial tracheid width	6	5.27539
MW	EW tangential tracheid width	5	1.29051
MW	EW wall thickness	2	2.71382
MW	EW ring width	4	1.0621
MW	LW coarseness	2	2.39165
MW	LW density	4	1.68245
MW	LW ring width	8	2.26132
MW	Annual ring wood coarseness	3	0.592969
MW	Annual ring wood wood density	5	3.25811
MW	Annual ring wood tangential tracheid width	3	1.87374
MW	Annual ring wood tangential tracheid width	3	0.998569
MW	Annual ring wood wall thickness	1	0
MW	EW number of cells	4	0.916815
MW	LW number of cells	3	0.101902
MW	TW number of cells	1	0.309976
MW	TW coarseness	1	0.372666
MW	TW density	5	2.72286
MW	TW wall thickness	1	1.48459
MW	TW ring width	1	0.474641
WCW	EW number of cells	7	1.90761
WCW	EW coarseness	3	0
WCW	EW density	10	4.96831
WCW	EW radial tracheid width	3	1.4713
WCW	EW tangential tracheid width	4	3.39493
WCW	EW wall thickness	4	3.04685
WCW	LW number of cells	8	3.8085
WCW	LW coarseness	1	0
WCW	LW density	10	0
WCW	LW radial tracheid width	1	0.228201
WCW	LW tangential tracheid width	4	0.380157
WCW	LW wall thickness	3	0
WCW	Annual ring wood number of cells	14	9.82114
WCW	Annual ring wood coarseness	7	3.17468
WCW	Annual ring wood density	9	1.53572
WCW	Annual ring wood radial tracheid width	3	1.29225
WCW	Annual ring wood tangential tracheid width	4	1.69952
WCW	Annual ring wood MOE	1	1.54476
WCW	Annual ring wood wall thickness	6	1.64281
WCW	EW percentage	4	5.78102
WCW	TW percentage	1	1.9451
WCW	TW number of cells	9	2.87122
WCW	TW coarseness	8	6.95929
WCW	TW density	10	0.91408
WCW	TW radial tracheid width	3	1.39197
WCW	TW tangential trachied width	3	0.586522
WCW	TW wall thickness	3	0
WCW	Annual ring wood ring width	5	7.66565
WCW	EW ring width	3	1.00785
WCW	TW ring width	5	3.77025
If the value of PVE is zero which presents that the genomic best linear unbiased prediction model (GBLUP) including their associated SNPs as fixed effects will not improve the prediction.

## Sheet: Table S6 Validation GWAS
Table S6 Significant SNPs under p value <0.05 in the validation population
Table S6a The details of Significant SNPs under p value <0.05 in validation population (parental population with 476 individuals)
order	Trait	Abbreviation	Wood type	Model type	Method	SNP	contig	Alleles	Traits_UV/MV	p-value*	MAF*
29	Wood density (Annual ring wood, earlywood, transition wood, latewood)	WD(ARW_EW_TW_LW)	JW	Multivariate	MV_GEMMA	MA_879701_2856	MA_879701	A/C	ARW density	0.0376085	0.15
11	Transition wood density	TWD	JW	Univariate	BLINK	MA_10277463_4132	MA_10277463	A/G	TW density	0.0468699	0.05
89	Earlywood (Ring width, wood density, coarseness, number of cells)	EW(RW_WD_C_NC)	MW	Multivariate	MV_GEMMA	MA_12842_2476	MA_12842	C/G	EW ring width	0.044944	0.13
51	Latewood coarseness	LC	MW	Univariate	BLINK	MA_8964699_5244	MA_8964699	C/T	LW coarseness	0.0378255	0.47
257	Earlywood (Ring width, wood density, coarseness, number of cells)	EW(RW_WD_C_NC)	WCW	Multivariate	MV_GEMMA	MA_12842_2476	MA_12842	C/G	EW ring width	0.00971746	0.13
264	Transition wood (Number of cells, ring width, radial tracheid width)	TW(NC_RW_RTW)	WCW	Multivariate	MV_GEMMA	MA_12842_2389	MA_12842	T/A	TW ring width	0.0200143	0.09
326	Transition wood (Ring width, wood density, coarseness, number of cells)	TW(RW_WD_C_NC)	WCW	Multivariate	MV_GEMMA	MA_12842_2389	MA_12842	T/A	TW ring width	0.0200143	0.09
267	Transition wood (Number of cells, ring width, radial tracheid width)	TW(NC_RW_RTW)	WCW	Multivariate	MV_GEMMA	MA_12842_2476	MA_12842	C/G	TW ring width	0.0200907	0.13
330	Transition wood (Ring width, wood density, coarseness, number of cells)	TW(RW_WD_C_NC)	WCW	Multivariate	MV_GEMMA	MA_12842_2476	MA_12842	C/G	TW ring width	0.0200907	0.13
302	Latewood (Coarseness, wood density, radial tracheid width, tangential tracheid width)	LW(C_WD_RTW_TTW)	WCW	Multivariate	MV_GEMMA	MA_436199_1316	MA_436199	G/A	LW tangential tracheid width	0.0239763	0.03
306	Number of cells (Annual ring wood, earlywood, transition wood, latewood)	NC(ARW_EW_TW_LW)	WCW	Multivariate	MV_GEMMA	MA_10428864_2972	MA_10428864	T/C	TW number of cells	0.0334143	0.17
280	Wood density (Annual ring wood, earlywood, transition wood, latewood)	WD(ARW_EW_TW_LW)	WCW	Multivariate	MV_GEMMA	MA_106297_6469	MA_106297	T/C	EW density	0.0356028	0.34
195	Earlywood (Coarseness, wood density, radial tracheid width, tangential tracheid width)	EW(C_WD_RTW_TTW)	WCW	Multivariate	MV_GEMMA	MA_12842_2490	MA_12842	C/G	EW density	0.0387903	0.09
219	Wood density (Annual ring wood, earlywood, transition wood, latewood)	WD(ARW_EW_TW_LW)	WCW	Multivariate	MV_GEMMA	MA_12842_2490	MA_12842	C/G	EW density	0.0387903	0.09
259	Earlywood (Ring width, wood density, coarseness, number of cells)	EW(RW_WD_C_NC)	WCW	Multivariate	MV_GEMMA	MA_12842_2490	MA_12842	C/G	EW density	0.0387903	0.09
191	Earlywood (Coarseness, wood density, radial tracheid width, tangential tracheid width)	EW(C_WD_RTW_TTW)	WCW	Multivariate	MV_GEMMA	MA_12842_2476	MA_12842	C/G	EW density	0.044231	0.13
215	Wood density (Annual ring wood, earlywood, transition wood, latewood)	WD(ARW_EW_TW_LW)	WCW	Multivariate	MV_GEMMA	MA_12842_2476	MA_12842	C/G	EW density	0.044231	0.13
255	Earlywood (Ring width, wood density, coarseness, number of cells)	EW(RW_WD_C_NC)	WCW	Multivariate	MV_GEMMA	MA_12842_2476	MA_12842	C/G	EW density	0.044231	0.13
162	Annual ring wood ring width	RW	WCW	Univariate	BLINK	MA_464588_5453	MA_464588	G/T	ARW ring width	0.0149344	0.08
141	Transition wood ring width	TRW	WCW	Univariate	BLINK	MA_12842_2476	MA_12842	C/G	TW ring width	0.0200907	0.13
181	Earlywood density	EWD	WCW	Univariate	UV_GEMMA	MA_106297_6469	MA_106297	T/C	EW density	0.0356028	0.34
168	Earlywood density	EWD	WCW	Univariate	UV_GEMMA	MA_12842_2490	MA_12842	C/G	EW density	0.0387903	0.09
144	Annual ring wood number of cells	NC	WCW	Univariate	BLINK	MA_10425958_1555	MA_10425958	A/T	ARW number of cells	0.0416321	0.1
167	Earlywood density	EWD	WCW	Univariate	UV_GEMMA	MA_12842_2476	MA_12842	C/G	EW density	0.044231	0.13
MAF* presents the minor allele frequency in validation population (476 mother trees). Otherwise, the meaning of variables are the same as Table S6.
	Table S6b Number of independent SNPs in validation population.
	Order of independent SNP	SNP
	1	MA_10277463_4132
	2	MA_10425958_1555
	3	MA_10428864_2972
	4	MA_106297_6469
	5	MA_12842_2389
	5	MA_12842_2476
	5	MA_12842_2490
	6	MA_436199_1316
	7	MA_464588_5453
	8	MA_879701_2856
	9	MA_8964699_5244

## Sheet: Table S7 GWAS GO annotation
Table S7 GWAS candidate gene further annotation. Genome-wide associated genes, GO annotation, and their best blast homologs in populus, Arabidopsis, and conifer. The blast information could be extracted from https://congenie.org/.
Gene	Description	Contig	PFAM-Description	GO-Description	Best BLAST Populus spp	Best BLAST Arabidopsis	Best BLAST Conifer spp
MA_100689g0010	---NA---	MA_100689
MA_10117117g0010	mitogen-activated kinase kinase kinase NPK1-like	MA_10117117	PF00069-Protein kinase domain,		Potri.002G228200.1	AT5G55090.1	PITA_000066509
			PF07714-Protein tyrosine kinase
MA_10277463g0010	3-phosphoinositide-dependent kinase-1	MA_10277463			Potri.006G078700.1	AT3G10572.1	PITA_000055369
MA_10425958g0010	kinesin KIN- mitochondrial isoform X1	MA_10425958	PF12872-OST-HTH/LOTUS domain		Potri.002G081300.1	AT4G39050.1	PITA_000000148
MA_10426292g0020	---NA---	MA_10426292					PITA_000045994
MA_10427326g0010	ras-related RABB1c	MA_10427326	PF00009-Elongation factor Tu GTP binding domain,		Potri.006G001500.1	AT4G17170.1	PITA_000035363
			PF00025-ADP-ribosylation factor family,
			PF00071-Ras family,
			PF01926-50S ribosome-binding GTPase,
			PF04670-Gtr1/RagA G protein conserved region,
			PF08477-Miro-like protein,
			PF13401-AAA domain
MA_10428113g0010	cysteine synthase-like	MA_10428113	PF00291-Pyridoxal-phosphate dependent enzyme	GO:0004124-cysteine synthase activity,	Potri.013G127800.1	AT2G43750.2	PITA_000061918
				GO:0006520-cellular amino acid metabolic process
MA_10428274g0010	Centromere S	MA_10428274	PF01346-Domain amino terminal to FKBP-type peptidyl-prolyl isomerase,		Potri.015G105900.3	AT5G50930.1
			PF04641-Replication termination factor 2,
			PF08175-Small acid-soluble spore protein O family
MA_10428274g0020	centromere S	MA_10428274	PF02291-Transcription initiation factor IID, 31kD subunit		Potri.015G105900.3	AT5G50930.1
MA_10428431g0010	anaphase-promoting complex subunit 1	MA_10428431		GO:0000151-ubiquitin ligase complex,	Potri.008G070300.3	AT5G05560.1
				GO:0006302-double-strand break repair,
				GO:0006312-mitotic recombination,
				GO:0007062-sister chromatid cohesion,
				GO:0007129-synapsis,
				GO:0007131-reciprocal meiotic recombination,
				GO:0007276-gamete generation,
				GO:0032875-regulation of DNA endoreduplication,
				GO:0042138-meiotic DNA double-strand break formation,
				GO:0043161-proteasomal ubiquitin-dependent protein catabolic process,
				GO:0043248-proteasome assembly,
				GO:0045132-meiotic chromosome segregation,
				GO:0051302-regulation of cell division,
				GO:0051510-regulation of unidimensional cell growth,
				GO:0051788-response to misfolded protein
MA_10428864g0010	Anaphase-promoting complex subunit 1	MA_10428864	PF01851-Proteasome/cyclosome repeat		Potri.008G070300.3	AT5G05560.1
MA_10431885g0010	uncharacterized protein LOC107492792	MA_10431885			Potri.006G054100.2	AT3G57570.2
MA_10432069g0010	4-coumarate-- ligase-like 5	MA_10432069	PF00501-AMP-binding enzyme		Potri.017G033600.1	AT1G20510.1	PITA_000026705
MA_10432069g0020	4-coumarate-- ligase-like 5	MA_10432069	PF00501-AMP-binding enzyme,	GO:0004321-fatty-acyl-CoA synthase activity,	Potri.002G012800.1	AT1G20510.1	PITA_000007261
			PF13193-Domain of unknown function (DUF4009)	GO:0005777-peroxisome,
				GO:0009611-response to wounding,
				GO:0009695-jasmonic acid biosynthetic process,
				GO:0009851-auxin biosynthetic process,
				GO:0010033-response to organic substance
MA_10432667g0010	cullin-3A-like isoform X1	MA_10432667	PF00888-Cullin family		Potri.010G093200.1	AT1G69670.1	PITA_000003714
MA_10432667g0020	cullin-3A-like isoform X1	MA_10432667	PF00888-Cullin family,	GO:0000911-cytokinesis by cell plate formation,	Potri.008G148300.1	AT1G26830.1	PITA_000003714
			PF01978-Sugar-specific transcriptional regulator TrmB,	GO:0004842-ubiquitin-protein ligase activity,
			PF03965-Penicillinase repressor,	GO:0005829-cytosol,
			PF09339-IclR helix-turn-helix domain,	GO:0006511-ubiquitin-dependent protein catabolic process,
			PF10557-Cullin protein neddylation domain	GO:0007062-sister chromatid cohesion,
				GO:0007155-cell adhesion,
				GO:0008284-positive regulation of cell proliferation,
				GO:0009630-gravitropism,
				GO:0009639-response to red or far red light,
				GO:0009880-embryonic pattern specification,
				GO:0009911-positive regulation of flower development,
				GO:0009960-endosperm development,
				GO:0010072-primary shoot apical meristem specification,
				GO:0010090-trichome morphogenesis,
				GO:0010228-vegetative to reproductive phase transition of meristem,
				GO:0010413-glucuronoxylan metabolic process,
				GO:0010431-seed maturation,
				GO:0019005-SCF ubiquitin ligase complex,
				GO:0031625-ubiquitin protein ligase binding,
				GO:0045010-actin nucleation,
				GO:0045492-xylan biosynthetic process,
				GO:0045595-regulation of cell differentiation,
				GO:0048765-root hair cell differentiation,
				-undefined
MA_10432667g0030	cullin-3A-like isoform X1	MA_10432667			Potri.010G093200.1	AT1G69670.1	PITA_000003714
MA_10433057g0020	---NA---	MA_10433057					PITA_000076916
MA_10434168g0010	rhomboid mitochondrial	MA_10434168	PF01694-Rhomboid family	GO:0005886-plasma membrane	Potri.010G004600.1	AT3G17611.2	PITA_000093354
MA_10434168g0020	rhomboid mitochondrial	MA_10434168			Potri.010G004600.1	AT3G17611.1	PITA_000093354
MA_10436600g0010	N-acylphosphatidylethanolamine synthase	MA_10436600	PF01553-Acyltransferase		Potri.011G146800.3	AT1G78690.1	PITA_000020196
MA_106297g0010	mitogen-activated kinase kinase kinase NPK1-like	MA_106297	PF00069-Protein kinase domain,	GO:0004672-protein kinase activity,	Potri.014G155000.1	AT5G55090.1	PITA_000073917
			PF07714-Protein tyrosine kinase	GO:0016310-phosphorylation
MA_108175g0010	D -box splicing factor binding site-domain-containing	MA_108175	PF01585-G-patch domain,		Potri.003G104200.1	AT1G33520.1	PITA_000048451
			PF12656-DExH-box splicing factor binding site
MA_108928g0010	elicitor-responsive 3	MA_108928	PF00168-C2 domain,		Potri.002G155600.2	AT1G63220.1	PITA_000002195
			PF01060-Transthyretin-like family
MA_11005g0010	kinase superfamily	MA_11005	PF00069-Protein kinase domain,	GO:0000166-nucleotide binding,	Potri.001G349300.1	AT1G79640.1	PITA_000079399
			PF10224-Predicted coiled-coil protein (DUF2205)	GO:0004672-protein kinase activity,
				GO:0005886-plasma membrane,
				GO:0006468-protein phosphorylation
MA_113808g0020	unknown	MA_113808
MA_113962g0010	2-isopropylmalate synthase B	MA_113962	PF08502-LeuA allosteric (dimerisation) domain	GO:0003852-2-isopropylmalate synthase activity,	Potri.005G083100.2	AT1G74040.1	PITA_000019788
				GO:0009098-leucine biosynthetic process,
				GO:0009941-chloroplast envelope
MA_114314g0010	C2 calcium-dependent membrane targeting	MA_114314	PF00168-C2 domain		Potri.010G024200.1	AT3G16510.1	PITA_000042745
MA_118436g0010	pre-mRNA-splicing factor ISY1 homolog	MA_118436	PF06246-Isy1-like splicing family		Potri.017G060200.1	AT3G18790.1	PITA_000012291
MA_125978g0010	leucine-rich repeat receptor-like tyrosine- kinase PXC3	MA_125978	PF00560-Leucine Rich Repeat,		Potri.019G084800.1	AT3G24240.1	PITA_000000930
			PF12799-Leucine Rich repeats (2 copies),
			PF13504-Leucine rich repeat,
			PF13516-Leucine Rich repeat,
			PF13855-Leucine rich repeat
MA_125978g0020	dihydroflavonol 4-reductase	MA_125978			Potri.002G033600.3	AT5G42800.1	PITA_000087769
MA_12842g0010	---NA---	MA_12842	PF00069-Protein kinase domain				PITA_000037372
MA_12842g0020	mitogen-activated kinase kinase kinase A-like	MA_12842	PF00069-Protein kinase domain,		Potri.014G155000.1	AT5G55090.1	PITA_000066323
			PF07714-Protein tyrosine kinase
MA_12842g0030	mitogen-activated kinase kinase kinase NPK1-like	MA_12842	PF00069-Protein kinase domain,	GO:0004672-protein kinase activity,	Potri.003G130000.1	AT5G55090.1	PITA_000023623
			PF07714-Protein tyrosine kinase	GO:0016310-phosphorylation
MA_128658g0010	B-box zinc finger 22-like	MA_128658	PF00643-B-box zinc finger,		Potri.011G105400.1	AT1G78600.1	PITA_000077091
			PF10080-Predicted membrane protein (DUF2318)
MA_139242g0010	hypothetical protein, partial	MA_139242
MA_14038g0010	GATA transcription factor 12-like	MA_14038			Potri.014G058600.1		PITA_000023628
MA_140464g0010	unknown	MA_140464		GO:0005739-mitochondrion,	Potri.016G084000.4	AT3G53470.1
				GO:0009535-chloroplast thylakoid membrane
MA_141147g0010	DEHYDRATION-INDUCED 19 isoform X2	MA_141147	PF05605-Drought induced 19 protein (Di19)	GO:0009987-cellular process,	Potri.005G020900.4	AT1G56280.2	PITA_000017968
				GO:0050896-response to stimulus
MA_15237g0010	probable E3 ubiquitin ligase SUD1 isoform X1	MA_15237		GO:0008270-zinc ion binding,	Potri.009G099400.1	AT4G34100.2	PITA_000013758
				GO:0010025-wax biosynthetic process
MA_15508g0010	glutamine synthetase	MA_15508	PF00120-Glutamine synthetase, catalytic domain,	GO:0004356-glutamate-ammonia ligase activity,	Potri.017G131100.1	AT5G37600.1	PITA_000017720
			PF03951-Glutamine synthetase, beta-Grasp domain	GO:0005524-ATP binding,
				GO:0005737-cytoplasm,
				GO:0006542-glutamine biosynthetic process,
				GO:0006807-nitrogen compound metabolic process
MA_17597g0010	late embryo abundance	MA_17597	PF01442-Apolipoprotein A1/A4/E domain,			AT4G21020.1	PITA_000052351
			PF02181-Formin Homology 2 Domain,
			PF02601-Exonuclease VII, large subunit,
			PF02987-Late embryogenesis abundant protein,
			PF05478-Prominin,
			PF05957-Bacterial protein of unknown function (DUF883),
			PF07464-Apolipophorin-III precursor (apoLp-III),
			PF09718-Lambda phage tail tape-measure protein (Tape_meas_lam_C),
			PF12732-YtxH-like protein
MA_183130g0010	family 2 glycosyltransferase	MA_183130	PF03552-Cellulose synthase,	GO:0016020-membrane,	Potri.006G181900.2	AT5G17420.1	PITA_000012981
			PF05290-Baculovirus immediate-early protein (IE-0),	GO:0016043-cellular component organization,
			PF14446-Prokaryotic RING finger family 1	GO:0016757-transferase activity, transferring glycosyl groups,
				GO:0046872-metal ion binding,
				GO:0070882-cell wall organization or biogenesis
MA_183130g0020	cellulose synthase A4	MA_183130	PF03552-Cellulose synthase,		Potri.002G257900.1	AT5G44030.1	PITA_000012981
			PF06570-Protein of unknown function (DUF1129)
MA_183273g0020	guanine nucleotide-binding subunit gamma 2-like	MA_183273	PF00631-GGL domain		Potri.015G142500.3	AT3G63420.2	PITA_000028209
MA_184308g0010	sorbitol dehydrogenase	MA_184308	PF00107-Zinc-binding dehydrogenase,		Potri.012G135000.2	AT5G51970.2	PITA_000095859
			PF01262-Alanine dehydrogenase/PNT, C-terminal domain,
			PF02254-TrkA-N domain,
			PF02826-D-isomer specific 2-hydroxyacid dehydrogenase, NAD binding domain,
			PF03721-UDP-glucose/GDP-mannose dehydrogenase family, NAD binding domain,
			PF05175-Methyltransferase small domain,
			PF10294-Putative methyltransferase,
			PF12847-Methyltransferase domain
MA_200163g0010	AUGMIN subunit 2	MA_200163			Potri.002G225100.1	AT2G32980.1	PITA_000020089
MA_20483g0010	pentatricopeptide repeat-containing At5g01110	MA_20483	PF00515-Tetratricopeptide repeat,		Potri.016G025600.1	AT5G39710.1	PITA_000004037
			PF00637-Region in Clathrin and VPS,
			PF01535-PPR repeat,
			PF01799-[2Fe-2S] binding domain,
			PF06239-Evolutionarily conserved signalling intermediate in Toll pathway,
			PF07719-Tetratricopeptide repeat,
			PF09105-Elongation factor SelB, winged helix ,
			PF10602-26S proteasome subunit RPN7,
			PF12854-PPR repeat,
			PF12895-Anaphase-promoting complex, cyclosome, subunit 3,
			PF13041-PPR repeat family ,
			PF13174-Tetratricopeptide repeat,
			PF13176-Tetratricopeptide repeat,
			PF13293-Domain of unknown function (DUF4074),
			PF13424-Tetratricopeptide repeat,
			PF13428-Tetratricopeptide repeat,
			PF13432-Tetratricopeptide repeat,
			PF13812-Pentatricopeptide repeat domain
MA_228591g0010	---NA---	MA_228591
MA_25654g0010	3-oxoacyl-[acyl-carrier- ] reductase 4-like	MA_25654	PF00106-short chain dehydrogenase,		Potri.010G056100.1	AT1G24360.1	PITA_000014213
			PF08659-KR domain,
			PF13561-Enoyl-(Acyl carrier protein) reductase
MA_27406g0010	NDR1 HIN1 12	MA_27406	PF03168-Late embryogenesis abundant protein		Potri.009G019600.1	AT5G22870.1	PITA_000016220
MA_289646g0010	E3 ubiquitin- ligase ATL23	MA_289646	PF00097-Zinc finger, C3HC4 type (RING finger),		Potri.005G244500.1	AT5G42200.1	PITA_000011872
			PF08746-RING-like domain,
			PF12678-RING-H2 zinc finger,
			PF12861-Anaphase-promoting complex subunit 11 RING-H2 finger,
			PF13639-Ring finger domain,
			PF13920-Zinc finger, C3HC4 type (RING finger),
			PF13923-Zinc finger, C3HC4 type (RING finger)
MA_29357g0010	mitogen-activated kinase kinase kinase NPK1-like	MA_29357	PF00069-Protein kinase domain,		Potri.003G130000.1	AT5G55090.1	PITA_000063716
			PF01163-RIO1 family,
			PF01636-Phosphotransferase enzyme family,
			PF05410-Porcine arterivirus-type cysteine proteinase alpha,
			PF07714-Protein tyrosine kinase
MA_330891g0010	D-alanine--D-alanine ligase family isoform 4	MA_330891	PF01820-D-ala D-ala ligase N-terminus		Potri.006G106000.1	AT3G08840.2
MA_34433g0010	V-type proton ATPase subunit e1-like	MA_34433
MA_360415g0010	ribosomal L7 L12 domain-containing	MA_360415			Potri.003G074800.1	AT1G70190.2	PITA_000047491
MA_42658g0010	DETOXIFICATION 33	MA_42658	PF01554-MatE,	GO:0005774-vacuolar membrane,	Potri.019G063500.1	AT1G47530.1	PITA_000053276
			PF13613-DDE superfamily endonuclease	GO:0009860-pollen tube growth,
				GO:0022857-transmembrane transporter activity,
				GO:0030048-actin filament-based movement
MA_42658g0020	DETOXIFICATION 29-like	MA_42658	PF01554-MatE,		Potri.008G187100.1	AT1G47530.1	PITA_000006596
			PF13197-Protein of unknown function (DUF4013)
MA_426944g0010	uncharacterized protein LOC18431142	MA_426944	PF05181-XPA protein C-terminus
MA_436199g0010	beta-	MA_436199	PF01373-Glycosyl hydrolase family 14		Potri.001G148900.2	AT4G17090.1	PITA_000047084
MA_464588g0010	BIG GRAIN 1-like A	MA_464588		GO:0009855-determination of bilateral symmetry,	Potri.001G170500.1	AT3G13980.1	PITA_000044771
				GO:0009944-polarity specification of adaxial/abaxial axis,
				GO:0010014-meristem initiation,
				GO:0010075-regulation of meristem growth
MA_47138g0010	---NA---	MA_47138					PITA_000002174
MA_482092g0010	---NA---	MA_482092
MA_5468g0010	nascent polypeptide-associated complex subunit alpha 1	MA_5468	PF00627-UBA/TS-N domain,	GO:0005794-Golgi apparatus,	Potri.001G034400.1	AT3G12390.1	PITA_000007277
			PF01849-NAC domain	GO:0006606-protein import into nucleus,
				GO:0009506-plasmodesma,
				GO:0009651-response to salt stress,
				GO:0022626-cytosolic ribosome
MA_6124g0010	polyphenol oxidase	MA_6124	PF12143-Protein of unknown function (DUF_B2219)		Potri.001G388900.1
MA_6124g0020	polyphenol oxidase	MA_6124	PF12143-Protein of unknown function (DUF_B2219)
MA_63888g0010	---NA---	MA_63888					PITA_000039153
MA_64117g0010	leucine-rich repeat receptor-like serine threonine- kinase BAM1	MA_64117	PF00069-Protein kinase domain,	GO:0000023-maltose metabolic process,	Potri.007G009200.1	AT5G65700.2	PITA_000021388
			PF00560-Leucine Rich Repeat,	GO:0004674-protein serine/threonine kinase activity,
			PF01636-Phosphotransferase enzyme family,	GO:0005524-ATP binding,
			PF07714-Protein tyrosine kinase,	GO:0005634-nucleus,
			PF08263-Leucine rich repeat N-terminal domain,	GO:0005829-cytosol,
			PF12799-Leucine Rich repeats (2 copies),	GO:0005886-plasma membrane,
			PF13504-Leucine rich repeat,	GO:0005983-starch catabolic process,
			PF13516-Leucine Rich repeat,	GO:0006468-protein phosphorylation,
			PF13855-Leucine rich repeat	GO:0007020-microtubule nucleation,
				GO:0007169-transmembrane receptor protein tyrosine kinase signaling pathway,
				GO:0007389-pattern specification process,
				GO:0008361-regulation of cell size,
				GO:0009414-response to water deprivation,
				GO:0009570-chloroplast stroma,
				GO:0009664-plant-type cell wall organization,
				GO:0009740-gibberellic acid mediated signaling pathway,
				GO:0009825-multidimensional cell growth,
				GO:0009832-plant-type cell wall biogenesis,
				GO:0009926-auxin polar transport,
				GO:0009932-cell tip growth,
				GO:0009934-regulation of meristem structural organization,
				GO:0010075-regulation of meristem growth,
				GO:0010162-seed dormancy process,
				-undefined
MA_66354g0010	hypothetical protein AXG93_3960s1300	MA_66354			Potri.013G127100.1	AT3G50040.1	PITA_000044879
MA_69436g0010	pentatricopeptide repeat-containing At5g61400	MA_69436	PF00566-Rab-GTPase-TBC domain,		Potri.015G105400.1	AT5G61400.1	PITA_000005844
			PF01535-PPR repeat,
			PF08542-Replication factor C C-terminal domain,
			PF08579-Mitochondrial ribonuclease P subunit (RPM2),
			PF09178-Domain of unknown function (DUF1945),
			PF10037-Mitochondrial 28S ribosomal protein S27,
			PF12554-Mitotic-spindle organizing gamma-tubulin ring associated,
			PF12854-PPR repeat,
			PF13041-PPR repeat family ,
			PF13176-Tetratricopeptide repeat,
			PF13428-Tetratricopeptide repeat,
			PF13812-Pentatricopeptide repeat domain
MA_7188813g0010	---NA---	MA_7188813	PF01138-3' exoribonuclease family, domain 1		Potri.016G055600.4
MA_7439660g0010	IQ domain-containing IQM3-like	MA_7439660			Potri.006G114700.1	AT3G52870.1	PITA_000014757
MA_77420g0010	ethylene-responsive transcription factor ESR2-like	MA_77420	PF00847-AP2 domain		Potri.003G161000.1	AT1G24590.1	PITA_000011105
MA_8367646g0010	probable xyloglucan endotransglucosylase hydrolase 23	MA_8367646	PF00722-Glycosyl hydrolases family 16,	GO:0005975-carbohydrate metabolic process,	Potri.013G005700.1	AT4G14130.1	PITA_000065708
			PF06955-Xyloglucan endo-transglycosylase (XET) C-terminus	GO:0016757-transferase activity, transferring glycosyl groups,
				GO:0016787-hydrolase activity
MA_876922g0010	mitogen-activated kinase kinase kinase NPK1-like	MA_876922	PF00069-Protein kinase domain,		Potri.014G155000.1	AT5G55090.1	PITA_000063716
			PF07714-Protein tyrosine kinase
MA_879701g0010	unknown	MA_879701	PF04654-Protein of unknown function, DUF599		Potri.001G372900.1	AT3G18215.1	PITA_000078166
MA_8861445g0010	GPI inositol-deacylase-like	MA_8861445	PF07819-PGAP1-like protein	GO:0005774-vacuolar membrane,	Potri.001G338000.1	AT3G27325.2	PITA_000018787
				GO:0005886-plasma membrane,
				GO:0006505-GPI anchor metabolic process,
				GO:0006886-intracellular protein transport,
				GO:0016021-integral to membrane,
				GO:0016023-cytoplasmic membrane-bounded vesicle,
				GO:0016788-hydrolase activity, acting on ester bonds,
				GO:0031227-intrinsic to endoplasmic reticulum membrane,
				GO:0051205-protein insertion into membrane
MA_8964699g0010	MOTHER of FT and TFL1-like isoform X2	MA_8964699			Potri.004G203900.1	AT4G20370.1	PITA_000082170
MA_9035900g0010	heat shock 22 kDa mitochondrial isoform X2	MA_9035900	PF00011-Hsp20/alpha crystallin family		Potri.003G076000.1	AT5G51440.1
MA_912814g0010	---NA---	MA_912814
MA_9146503g0010	FACT complex subunit SSRP1-like	MA_9146503	PF03531-Structure-specific recognition protein (SSRP1)		Potri.017G078500.1	AT3G28730.1	PITA_000008281
MA_9349488g0010	transmembrane (DUF1068)	MA_9349488	PF06364-Protein of unknown function (DUF1068)		Potri.004G006500.1	AT1G05070.1	PITA_000014422
MA_9448764g0010	purple acid phosphatase 3-like	MA_9448764	PF00149-Calcineurin-like phosphoesterase		Potri.015G031300.1	AT1G25230.1	PITA_000032433
MA_95898g0010	no apical meristem	MA_95898	PF02365-No apical meristem (NAM) protein,	GO:0003677-DNA binding,	Potri.018G068700.1	AT4G29230.1	PITA_000000938
			PF03119-NAD-dependent DNA ligase C4 zinc finger domain	GO:0003700-sequence-specific DNA binding transcription factor activity,
				GO:0006355-regulation of transcription, DNA-dependent,
				GO:0007275-multicellular organismal development
MA_9831023g0010	transcription factor jumonji ( ) domain	MA_9831023	PF02373-JmjC domain, hydroxylase		Potri.003G126600.1	AT1G63490.1	PITA_000013516
